# Supplementary material for: Interrogating the Plasmodium Sporozoite Surface: Identification of Surface-Exposed Proteins and Demonstration of Glycosylation on CSP and TRAP by Mass Spectrometry-Based Proteomics
Source: PLoS Pathog. 2016 Apr 29;12(4):e1005606. doi: 10.1371/journal.ppat.1005606 (PMC4851412; doi:10.1371/journal.ppat.1005606)
Supplement: S1 Table — (XLSX) [file ppat.1005606.s003.xlsx]

## Sheet: S1_Table
S1 Table. Sample Details of Biological Replicates. (a) CIDR = Center for Infectious Disease Research (formerly Seattle Biomedical Research Institute); JHU = Johns Hopkins University. (b) The number of P. falciparum or An. gambiae proteins identifed fro each sample with a ProteinProphet probability corresponding to a false discovery rate less than 1%. (c) Peptide spectrum matches were counted as t…
Experimental Conditions							Proteins ID'db		Percent of all peptide spectrum matchesc
Biological Replicate		Laboratory that produced sporozoitesa	# of Purified Sporozoites	Bead Wash Protocol	# of SDS-PAGE fractions	Liquid Chromatography Gradient Length (min)	P. falciparum	Mosquito	P. falciparum	Mosquito	BSA	Streptavidin	Trypsin	Keratin, lab contaminants, etc.
Group #1	Untreated #1	CIDR	7500000	1	8	60	27	278	2.16	17.4	16.3	40.6	11.5	12.1
	Untreated #2	CIDR	8250000	1	9	60	48	423	3.13	22.8	14.9	38.9	11.5	8.82
	Untreated #3	CIDR	6880000	1	9	60	27	233	1.93	14.1	18.2	43.3	12.5	10
Group #2	Untreated #4	JHU	15000000	2	9	60	313	411	11.4	17.4	36.7	6.18	13.1	15.3
	Untreated #5	JHU	4000000	3	9	60	205	140	12.4	7.63	20.8	4.54	15	39.7
	Untreated #6	JHU	20000000	3	9	60	148	108	7.14	4.23	34.8	10.8	11.6	31.5
No Label #1		JHU	12600000	3	9	60	12	57	0.185	4.15	30.6	6.41	16.1	42.6
No Label #2		JHU	28000000	3	9	60	32	210	1.19	20.7	27.8	12.7	6.09	31.5
No Label #3		JHU	10300000	3	9	60	27	35	1.41	3.04	29.1	16	19.8	30.8
BSA #1		CIDR	6250000	1	4	90	78	450	4.24	40.8	12.1	18.5	8.93	15.9
BSA #2		CIDR	7500000	1	7	60	154	495	8.64	31	16.5	3.32	17.9	22.6
BSA #3		CIDR	6700000	1	7	60	165	600	8.39	46.3	12.5	2.53	14.8	15.5
Heparin #1		CIDR	8600000	1	7	60	60	442	4.35	42.4	15.9	2.9	17.1	17.3
Heparin #2		CIDR	6500000	1	7	60	36	237	3.93	20.6	24.6	5.27	20.9	24.8
Heparin #3		CIDR	11600000	1	7	60	27	267	3.54	33.2	23.4	4.46	19.6	15.7
Untreated for Fig. 5d		JHU	29000000	1	9	60	-	-	-	-	-	-	-	-
Bead Wash Protocol 1
1) 0.1% w/v SDS in distilled water, 400 mM urea, 150 mM NaCl, 50 mM Tris-HCl pH 8.0
2) 0.1% w/v SDS in distilled water, 500 mM NaCl, 50 mM Tris-HCl pH 8.0
3) 0.1% w/v SDS in distilled water, 50 mM Tris-HCl pH 8.0
Bead Wash Protocol 2
1) 2% w/v SDS in distilled water
2) 1% v/v Triton X-100, 500 mM NaCl, 1 mM EDTA and 50 mM Hepes pH 7.5
3) 50 mM Tris pH 7.4 and 50 mM NaCl
Bead Wash protocol 3
1) 2 % w/v SDS in distilled water
2) 6M Urea, 2% SDS, 1M NaCl, 50 mM Tris pH 7.4
3) 0.2% SDS, 4M Urea, 200 mM NaCl, 1 mM EDTA and 50 mM Tris pH 7.4
4) 0.2% SDS, 50 mM NaCl and 50 mM Tris pH 7.4
