# Supplementary material for: Interrogating the Plasmodium Sporozoite Surface: Identification of Surface-Exposed Proteins and Demonstration of Glycosylation on CSP and TRAP by Mass Spectrometry-Based Proteomics
Source: PLoS Pathog. 2016 Apr 29;12(4):e1005606. doi: 10.1371/journal.ppat.1005606 (PMC4851412; doi:10.1371/journal.ppat.1005606)
Supplement: S6 Table — (XLSX) [file ppat.1005606.s008.xlsx]

## Sheet: S6_Table
S6 Table. P. falciparum proteins with spectral evidence for incorporation of biotin tag. For each biological replicate, the number of high-quality mass peptide spectrum matches (PSMs) showing evidence of labeling of lysine with the biotin tag is given. PSMs are only listed if the protein was confidently identified in the given replicate. A PSM was considered high-quality if it was identified with…
Protein	Description	Untreated #1	Untreated #2	Untreated #3	Untreated #4	Untreated #5	Untreated #6	BSA #1	BSA #2	BSA #3	Heparin #1	Heparin #2	Heparin #3	No Label #1	No Label #2	No Label #3
PF3D7_0304600	circumsporozoite (CS) protein (CSP)	95	175	87	174	164	117	155	391	643	143	40	116	-	-	-
PF3D7_0104000	thrombospondin-related sporozoite protein (TRSP)	-	2	-	7	7	9	10	26	68	16	2	10	-	-	-
PF3D7_0818600	conserved Plasmodium protein, unknown function	2	3	2	3	1	1	7	11	28	1	-	-	-	-	-
PF3D7_1446900	glutaminyl-peptide cyclotransferase, putative	-	-	-	-	-	-	4	12	26	3	-	1	-	-	-
PF3D7_0919500	sugar transporter, putative	-	-	-	1	-	-	1	16	20	-	-	-	-	-	-
PF3D7_0704600	ubiquitin transferase, putative	-	-	-	-	-	-	-	-	-	6	-	-	-	-	-
PF3D7_1246200	actin I (ACT1)	-	-	-	-	2	2	3	5	3	-	-	-	-	-	-
PF3D7_1133400	apical membrane antigen 1 (AMA1)	-	-	-	-	-	-	-	3	11	-	-	-	-	-	-
PF3D7_1243900	double C2-like domain-containing protein (DOC2)	-	-	-	-	-	-	2	-	-	1	-	7	-	-	-
PF3D7_1137800	conserved Plasmodium protein, unknown function	-	-	-	-	1	1	-	2	5	-	-	-	-	-	-
PF3D7_1342600	myosin A (MyoA)	1	3	1	-	-	-	3	-	1	-	-	-	-	-	-
PF3D7_1449000	gamete egress and sporozoite traversal protein, putative (GEST)	-	-	-	-	-	-	1	-	4	-	-	-	-	-	-
PF3D7_0508000	6-cysteine protein (P38)	-	-	-	-	-	-	-	1	3	-	-	-	-	-	-
PF3D7_0612800	6-cysteine protein (P12p)	-	-	-	-	-	-	-	2	2	-	-	-	-	-	-
PF3D7_0812300	conserved Plasmodium protein, unknown function	-	-	-	-	-	-	-	2	2	-	-	-	-	-	-
PF3D7_1335900	sporozoite surface protein 2 (TRAP)	-	4	-	-	-	-	-	-	-	-	-	-	-	-	-
PF3D7_0322000	peptidyl-prolyl cis-trans isomerase (CYP19A)	-	-	-	-	2	1	-	-	-	-	-	-	-	-	-
PF3D7_0408600	sporozoite invasion-associated protein 1 (SIAP-1)	-	-	-	-	-	-	-	-	2	1	-	-	-	-	-
PF3D7_0610400	histone H3 (H3)	-	-	-	-	-	-	-	-	3	-	-	-	-	-	-
PF3D7_0818200	14-3-3 protein (14-3-3I)	-	-	-	-	2	1	-	-	-	-	-	-	-	-	-
PF3D7_1446500	conserved Plasmodium protein, unknown function	-	-	-	-	-	-	-	-	-	-	-	-	-	-	-
PF3D7_0104100	conserved Plasmodium membrane protein, unknown function	-	-	-	-	-	-	-	-	2	-	-	-	-	-	-
PF3D7_0617900	histone H3 variant, putative (H3.3)	-	-	-	-	-	-	-	1	1	-	-	-	-	-	-
PF3D7_0511400	conserved Plasmodium protein, unknown function	-	-	-	-	-	1	-	-	-	-	-	-	-	-	-
PF3D7_0801900	conserved Plasmodium protein, unknown function	-	-	-	-	-	-	-	1	-	-	-	-	-	-	-
PF3D7_0816500	small heat shock protein HSP20, putative (HSP20)	-	-	-	-	-	-	-	1	-	-	-	-	-	-	-
PF3D7_0819600	conserved Plasmodium protein, unknown function	-	-	-	-	-	-	-	-	1	-	-	-	-	-	-
PF3D7_0919300	thioredoxin, putative	-	-	-	-	1	-	-	-	-	-	-	-	-	-	-
PF3D7_1105100	histone H2B (H2B)	-	-	-	-	-	-	-	-	1	-	-	-	-	-	-
PF3D7_1222300	endoplasmin, putative (GRP94)	-	-	-	-	-	1	-	-	-	-	-	-	-	-	-
