# Supplementary material for: Interrogating the Plasmodium Sporozoite Surface: Identification of Surface-Exposed Proteins and Demonstration of Glycosylation on CSP and TRAP by Mass Spectrometry-Based Proteomics
Source: PLoS Pathog. 2016 Apr 29;12(4):e1005606. doi: 10.1371/journal.ppat.1005606 (PMC4851412; doi:10.1371/journal.ppat.1005606)
Supplement: S7 Table — (XLSX) [file ppat.1005606.s009.xlsx]

## Sheet: S7_Table
S7 Table. Compiled spectral abundance of all P. falciparum proteins identified from salivary gland sporozoites. The spectral counts (SpC, shaded blue) are given for each protein identified in the experiments described here as well as in our previous analysis of the P. falciparum salivary gland sporozoite surface proteome and whole proteome (Lindner and Swearingen et al. Molecular & Cellular Prote…
Protein	Description	Protein Length	Observed in Untreated (n=6)	Observed in BSA-treated (n=3)	Observed in heparin-treated (n=3)	Observed in unlabeled (n=3)	Whole Proteome (MCP 2013)	Surface Proteome (MCP 2013)	Untreated Replicate #1	Untreated Replicate #2	Untreated Replicate #3	Untreated Replicate #4	Untreated Replicate #5	Untreated Replicate #6	BSA-treated Replicate #1	BSA-treated Replicate #2	BSA-treated Replicate #3	Heparin-treated Replicate #1	Heparin-treated Replicate #2	Heparin-treated Replicate #3	Unlabeled Control Replicate #1	Unlabeled Control Replicate #2	Unlabeled Control Replicate #3	Whole Proteome (MCP 2013)	Surface Proteome (MCP 2013)	Untreated Replicate #1	Untreated Replicate #2	Untreated Replicate #3	Untreated Replicate #4	Untreated Replicate #5	Untreated Replicate #6	BSA-treated Replicate #1	BSA-treated Replicate #2	BSA-treated Replicate #3	Heparin-treated Replicate #1	Heparin-treated Replicate #2	Heparin-treated Replicate #3	Unlabeled Control Replicate #1	Unlabeled Control Replicate #2	Unlabeled Control Replicate #3
PF3D7_1008700	tubulin beta chain	445	6	3	3	3	1865		4	8	8	91	94	55	16	33	32	3	9	4	4	3	10	1.43294		-4.71178	-4.01863	-4.01863	-1.58721	-1.55478	-2.09074	-3.32549	-2.60157	-2.63234	-4.99946	-3.90085	-4.71178	-4.71178	-4.99946	-3.79549
PF3D7_1137800	conserved Plasmodium protein, unknown function	151	6	3	3	3	519	6	9	15	13	125	39	46	8	28	43	14	15	12	2	5	4	1.23462	-3.22552	-2.82006	-2.30923	-2.45233	-0.188966	-1.35372	-1.18864	-2.93784	-1.68508	-1.25608	-2.37822	-2.30923	-2.53237	-4.32413	-3.40784	-3.63099
PF3D7_1335900	thrombospondin-related anonymous protein (TRAP)	574	6	3	3	2	2431	1	35	59	30	106	68	35	13	33	33	17	19	8	3	16		1.44343	-6.35263	-2.79728	-2.27509	-2.95143	-1.68919	-2.13312	-2.79728	-3.78768	-2.85612	-2.85612	-3.51942	-3.40819	-4.27319	-5.25402	-3.58004
PF3D7_1342600	myosin A (MyoA)	818	6	3	3	2	1890		26	51	12	246	61	66	69	112	146	17	6	6	4	23		0.83747		-3.44877	-2.77504	-4.22196	-1.20153	-2.59599	-2.51721	-2.47276	-1.98836	-1.72326	-3.87365	-4.9151	-4.9151	-5.32057	-3.57137
PF3D7_1246200	actin I (ACT1)	376	6	3	3	2	913	3	16	33	18	72	94	63	23	58	32	9	10	7		3	5	0.887147	-4.83098	-3.157	-2.43308	-3.03922	-1.65292	-1.38629	-1.78645	-2.79409	-1.86915	-2.46385	-3.73236	-3.627	-3.98368		-4.83098	-4.32015
PF3D7_0304600	circumsporozoite (CS) protein (CSP)	397	6	3	3	1	1484	164	619	855	543	1677	1314	1095	425	1172	1548	523	466	503			5	1.31856	-0.88407	0.444169	0.767165	0.313173	1.44083	1.19689	1.01457	0.0681529	1.08253	1.36078	0.275645	0.160249	0.236654			-4.3745
PF3D7_1222300	endoplasmin, putative (GRP94)	821	6	3	3	1	1159		3	5	6	51	24	16	7	25	28	10	2	6		7		0.34479		-5.61191	-5.10109	-4.91876	-2.7787	-3.53247	-3.93793	-4.76461	-3.49165	-3.37832	-4.40794	-6.01738	-4.91876		-4.76461
PF3D7_0919500	sugar transporter, putative	476	6	3	3	1	238	3	25	21	9	63	36	29	40	114	117	16	34	20			6	-0.693147	-5.06681	-2.94654	-3.1209	-3.96819	-2.02228	-2.5819	-2.79812	-2.47654	-1.42922	-1.40324	-3.39283	-2.63906	-3.16969			-4.37366
PF3D7_1133400	apical membrane antigen 1 (AMA1)	622	6	3	3	0	1270	5	6	21	9	21	32	23	17	58	139	7	3	6				0.713832	-4.8235	-4.64118	-3.38842	-4.23572	-3.38842	-2.9672	-3.29745	-3.59973	-2.3725	-1.49847	-4.48703	-5.33433	-4.64118
PF3D7_1235700	ATP synthase subunit beta, mitochondrial	535	6	3	3	0	1112	91	106	115	103	183	37	45	103	68	86	39	43	36				0.731649	-1.77141	-1.61883	-1.53733	-1.64754	-1.07278	-2.67135	-2.4756	-1.64754	-2.06276	-1.82792	-2.61871	-2.52107	-2.69875
PF3D7_0818600	BEM46-like protein, putative (PBLP)	302	6	3	3	0	413		10	23	11	38	18	17	54	49	96	5	16	5				0.313021		-3.40784	-2.57493	-3.31253	-2.07284	-2.82006	-2.87721	-1.72144	-1.81861	-1.14608	-4.10099	-2.93784	-4.10099
PF3D7_1446900	glutaminyl-peptide cyclotransferase, putative	383	6	3	3	0	298		9	9	5	8	7	5	12	33	61	32	24	38				-0.250942		-3.75081	-3.75081	-4.3386	-3.86859	-4.00212	-4.3386	-3.46313	-2.45153	-1.83716	-2.4823	-2.76998	-2.31045
PF3D7_0812300	sporozoite surface protein 3, putative (SSP3)	461	6	3	3	0	207	1	4	4	1	18	15	14	9	33	45	8	13	5				-0.800679	-6.1334	-4.7471	-4.7471	-6.1334	-3.24303	-3.42535	-3.49434	-3.93617	-2.63689	-2.32674	-4.05396	-3.56845	-4.52396
PF3D7_0104000	thrombospondin-related sporozoite protein (TRSP)	163	6	3	3	0	153	8	12	14	3	86	44	40	18	82	141	45	34	50				-0.0633123	-3.01431	-2.60884	-2.45469	-3.99514	-0.639403	-1.30956	-1.40487	-2.20338	-0.687031	-0.14499	-1.28709	-1.56739	-1.18173
PF3D7_0304000	inner membrane complex protein 1a, putative (IMC1a)	861	6	3	2	3	1174		2	10	4	137	39	37	20	40	49	9	9		12	23	3	0.310077		-6.06495	-4.45551	-5.3718	-1.83811	-3.09453	-3.14718	-3.76236	-3.06922	-2.86627	-4.56087	-4.56087		-4.27319	-3.6226	-5.65948
PF3D7_0204700	hexose transporter (HT)	504	6	3	2	1	207	5	3	4	4	31	24	23	31	65	41	5	14				4	-0.889857	-4.61314	-5.12396	-4.83628	-4.83628	-2.78859	-3.04452	-3.08708	-2.78859	-2.04819	-2.509	-4.61314	-3.58352				-4.83628
PF3D7_0819600	conserved Plasmodium protein, unknown function	277	6	3	2	0	384		4	3	4	41	31	24	3	12	23	5	6					0.326625		-4.23772	-4.52541	-4.23772	-1.91045	-2.19003	-2.44596	-4.52541	-3.13911	-2.48852	-4.01458	-3.83226
PF3D7_0903700	alpha tubulin 1	453	6	3	1	2	1018		2	4	3	30	31	13	11	18	31	3				1	8	0.809703		-5.42274	-4.7296	-5.01728	-2.71469	-2.6819	-3.55094	-3.718	-3.22552	-2.6819	-5.01728				-6.11589	-4.03645
PF3D7_1462800	glyceraldehyde-3-phosphate dehydrogenase (GAPDH)	337	6	3	1	1	994	14	3	6	4	71	40	25	7	6	14	8				4		1.08165	-3.18103	-4.72147	-4.02832	-4.43379	-1.5574	-2.1312	-2.60121	-3.87417	-4.02832	-3.18103	-3.74064				-4.43379
PF3D7_0818200	14-3-3 protein (14-3-3I)	262	6	3	1	0	523		4	12	2	24	32	27	2	6	13	14						0.691237		-4.18205	-3.08344	-4.8752	-2.39029	-2.10261	-2.27251	-4.8752	-3.77659	-3.0034	-2.92929
PF3D7_0929600	G2 protein, putative	272	6	3	1	0	426		2	11	7	13	20	14	7	3	6	4						0.448637		-4.91265	-3.20791	-3.65989	-3.04085	-2.61007	-2.96674	-3.65989	-4.50719	-3.81404	-4.21951
PF3D7_1324900	L-lactate dehydrogenase (LDH)	316	6	3	0	0	666		6	4	3	44	23	20	9	8	9							0.745547		-3.96398	-4.36945	-4.65713	-1.97155	-2.62025	-2.76001	-3.55852	-3.6763	-3.55852
PF3D7_0508000	6-cysteine protein (P38)	349	5	3	3	0	274		1	4	1	8	10		3	15	40	3	12	4				-0.241944		-5.85507	-4.46878	-5.85507	-3.77563	-3.55249		-4.75646	-3.14702	-2.16619	-4.75646	-3.37017	-4.46878
PF3D7_0919300	thioredoxin-like protein 1, putative (TrxL1)	207	5	3	2	2	494			4	2	94	78	49	23	23	8	5		2	4		10	0.869817			-3.94642	-4.63957	-0.789424	-0.97601	-1.4409	-2.19722	-2.19722	-3.25328	-3.72328		-4.63957	-3.94642		-3.03013
PF3D7_0408600	sporozoite invasion-associated protein 1 (SIAP1)	984	5	3	2	1	1891			7	7	73	35	22	11	24	20	6		5		11		0.653235			-4.94572	-4.94572	-2.60117	-3.33628	-3.80058	-4.49373	-3.71357	-3.89589	-5.09987		-5.28219		-4.49373
PF3D7_0816500	small heat shock protein HSP20, putative (HSP20)	172	5	3	1	1	560	2		3	2	90	28	25	7	16	6		2				12	1.18044	-4.45435		-4.04888	-4.45435	-0.647685	-1.81529	-1.92862	-3.20158	-2.37491	-3.35574		-4.45435				-2.66259
PF3D7_1221400	inner membrane complex protein 1h, putative (IMC1h)	524	5	3	0	1	615		1	3		20	19	5	8	10	19						1	0.160131		-6.26149	-5.16288		-3.26576	-3.31705	-4.65205	-4.18205	-3.95891	-3.31705						-6.26149
PF3D7_1230300	subpellicular microtubule protein 2, putative (SPM2)	258	5	1	0	0	155		4	5		19	6	8			8							-0.509534		-4.16667	-3.94352		-2.60852	-3.7612	-3.47352			-3.47352
PF3D7_1407700	conserved Plasmodium protein, unknown function	406	4	3	3	1	1152	1		2		90	56	35	7	33	23	4	6	1		4		1.0429	-6.00635		-5.31321		-1.50654	-1.981	-2.45101	-4.06044	-2.50985	-2.87086	-4.62006	-4.21459	-6.00635		-4.62006
PF3D7_0620000	conserved Plasmodium protein, unknown function	505	4	3	3	0	39		4			3	3	3	2	2	8	5	1	5				-2.561		-4.83826			-5.12595	-5.12595	-5.12595	-5.53141	-5.53141	-4.14512	-4.61512	-6.22456	-4.61512
PF3D7_1357000,PF3D7_1357100	elongation factor 1-alpha;elongation factor 1-alpha	443	4	3	2	3	1374		6			49	38	33	7	18	26	1	12		1	8	7	1.13191		-4.30181			-2.20175	-2.45598	-2.59706	-4.14766	-3.2032	-2.83547	-6.09357	-3.60866		-6.09357	-4.01413	-4.14766
PF3D7_0818900	heat shock protein 70 (HSP70)	677	4	3	2	2	827	4		11		124	102	52	20	46	44	11	5		6	2		0.200133	-5.13138		-4.11978		-1.69739	-1.8927	-2.56643	-3.52194	-2.68903	-2.73348	-4.11978	-4.90823		-4.72591	-5.82452
PF3D7_1406800	glideosome associated protein with multiple membrane spans 3 (GAPM3)	284	4	3	1	1	360			5		87	38	33	7	21	41	15					5	0.23713			-4.03954		-1.18307	-2.01139	-2.15247	-3.70306	-2.60445	-1.9354	-2.94092					-4.03954
PF3D7_0723300	conserved Plasmodium protein, unknown function	880	4	3	1	1	330	2		3		38	21	25	12	18	19		3			8		-0.980829	-6.08677		-5.68131		-3.14234	-3.7354	-3.56105	-4.29502	-3.88955	-3.83548		-5.68131			-4.70048
PF3D7_1444800	fructose-bisphosphate aldolase (FBPA)	369	4	3	1	0	608			3		61	67	32	6	18	13	3						0.499378			-4.81218		-1.79992	-1.7061	-2.44506	-4.11904	-3.02042	-3.34585	-4.81218
PF3D7_1361800	conserved Plasmodium protein, unknown function	2605	4	3	0	1	1922				2	98	8	16	21	35	18					2		-0.304066				-7.17204	-3.28022	-5.78575	-5.0926	-4.82067	-4.30984	-4.97482					-7.17204
PF3D7_0917900	heat shock protein 70 (HSP70-2)	652	4	3	0	0	823	4		3		29	10	6	3	8	13							0.232912	-5.09375		-5.38143		-3.11275	-4.17746	-4.68829	-5.38143	-4.4006	-3.9151
PF3D7_0422300	alpha tubulin 2	450	4	3	0	0	772			1		4	1	1	1	9	6							0.539737			-6.10925		-4.72295	-6.10925	-6.10925	-6.10925	-3.91202	-4.31749
PF3D7_0918000	glideosome-associated protein 50 (GAP50)	396	4	3	0	0	673			5		11	7	8	2	12	8							0.530331			-4.37198		-3.58352	-4.0355	-3.90197	-5.28827	-3.49651	-3.90197
PF3D7_1207400	conserved Plasmodium protein, unknown function	395	4	3	0	0	529			2		12	5	1	4	3	7							0.292103			-5.28574		-3.49398	-4.36945	-5.97889	-4.59259	-4.88027	-4.03298
PF3D7_0304100	inner membrane complex protein 1e, putative (IMC1e)	525	4	3	0	0	495			4		17	6	8	3	10	15							-0.0588405			-4.8771		-3.43018	-4.47164	-4.18396	-5.16479	-3.96081	-3.55535
PF3D7_1465900	40S ribosomal protein S3	221	4	3	0	0	180			2		8	4	4	2	6	4							-0.205206			-4.70502		-3.31872	-4.01187	-4.01187	-4.70502	-3.6064	-4.01187
PF3D7_1211800,PF3D7_1365900	polyubiquitin (PfpUB);60S ribosomal protein L40/UBI, putative	381	4	3	0	0				38		8	11	12	36	55	9										-2.30521		-3.86336	-3.5449	-3.45789	-2.35928	-1.93547	-3.74557
PF3D7_1213400	conserved Plasmodium protein, unknown function	576	4	2	0	0	753	4		2		17	19	6		5	11							0.267958	-4.96981		-5.66296		-3.52289	-3.41167	-4.56435		-4.74667	-3.95821
PF3D7_0511400	conserved Plasmodium protein, unknown function	381	4	1	0	0	235			3		10	7	8			3							-0.483214			-4.84419		-3.64021	-3.99689	-3.86336			-4.84419
PF3D7_1226300	haloacid dehalogenase-like hydrolase, putative (HAD2)	295	4	0	0	0	239			2		6	6	5										-0.210512			-4.99383		-3.89522	-3.89522	-4.07754
PF3D7_0423500	glideosome associated protein with multiple membrane spans 2 (GAPM2)	372	3	3	3	2	448	13				103	71	64	7	16	32	18	12	9		5	32	0.185899	-3.35394				-1.28416	-1.65621	-1.76001	-3.97298	-3.14631	-2.45316	-3.02852	-3.43399	-3.72167		-4.30946	-2.45316
PF3D7_1011500	conserved Plasmodium membrane protein, unknown function	175	3	3	3	1	204	6				79	50	49	17	63	70	10	9	10	6			0.153334	-3.37303				-0.795338	-1.25276	-1.27297	-2.33157	-1.02165	-0.916291	-2.8622	-2.96756	-2.8622	-3.37303
PF3D7_0525800	inner membrane complex protein 1g, putative (IMC1g)	300	3	3	3	0	378	2		2		21	10		3	12	16	3	6	5				0.231112	-5.01064		-5.01064		-2.65926	-3.4012		-4.60517	-3.21888	-2.93119	-4.60517	-3.91202	-4.09434
PF3D7_0617900	histone H3 variant, putative (H3.3)	136	3	3	2	0	60			4			10	16	1	9	4	9	4					-0.81831			-3.52636			-2.61007	-2.14007	-4.91265	-2.71543	-3.52636	-2.71543	-3.52636
PF3D7_1006000	conserved Plasmodium protein, unknown function	426	3	3	1	2	289					25	9	16	5	3	6	2			4	2		-0.388013					-2.83556	-3.85721	-3.28185	-4.445	-4.95583	-4.26268	-5.36129			-4.66814	-5.36129
PF3D7_0515700	glideosome-associated protein 40, putative (GAP40)	456	3	3	1	1	345					56	17	19	8	7	3	2				4		-0.278948					-2.09714	-3.28928	-3.17805	-4.04305	-4.17658	-5.02388	-5.42935				-4.7362
PF3D7_1246400	myosin A tail domain interacting protein (MTIP)	204	3	3	1	1	180					24	19	16	2	3	3	1				2		-0.125163					-2.14007	-2.37368	-2.54553	-4.62497	-4.21951	-4.21951	-5.31812				-4.62497
PF3D7_1438900	thioredoxin peroxidase 1 (Trx-Px1)	195	3	3	1	0	419					34	10	5	4	24	16	7						0.764871					-1.74664	-2.97041	-3.66356	-3.88671	-2.09495	-2.50041	-3.32709
PF3D7_0621400	Pf77 protein (ALV7)	664	3	3	1	0	414					7	8	5	1	5	2	1						-0.472416					-4.55237	-4.41884	-4.88884	-6.49828	-4.88884	-5.80513	-6.49828
PF3D7_0506900	rhomboid protease ROM4 (ROM4)	759	3	3	1	0	405					9	3	3	11	59	42		9					-0.628115					-4.43478	-5.53339	-5.53339	-4.23411	-2.55446	-2.89433		-4.43478
PF3D7_1341800	inner membrane complex protein 1k, putative (IMC1k)	462	3	3	1	0	283					9	11	3	1	2	11		2					-0.490118					-3.93834	-3.73767	-5.03695	-6.13556	-5.44242	-3.73767		-5.44242
PF3D7_1449000	gamete egress and sporozoite traversal protein, putative (GEST)	248	3	3	0	2	743					11	9	24	3	10	33				12		7	1.09727					-3.11553	-3.3162	-2.33537	-4.41482	-3.21084	-2.01692				-3.02852		-3.56752
PF3D7_1451100	elongation factor 2 (eEF2)	832	3	3	0	1	622					54	39	24	10	10	5					2		-0.290892					-2.73485	-3.06027	-3.54578	-4.42125	-4.42125	-5.11439					-6.03069
PF3D7_1452000	rhoptry neck protein 2 (RON2)	2189	3	3	0	1	534					16	6	3	7	14	37					8		-1.4108					-4.91861	-5.89944	-6.59259	-5.74529	-5.05214	-4.08028					-5.61176
PF3D7_1015900	enolase (ENO)	446	3	3	0	0	428					30	5	4	4	29	9							-0.0411958					-2.69912	-4.49088	-4.71402	-4.71402	-2.73302	-3.90309
PF3D7_1224300	polyadenylate-binding protein, putative (PABP)	875	3	3	0	0	416					18	11	4	4	3	4							-0.743539					-3.88385	-4.37633	-5.38793	-5.38793	-5.67561	-5.38793
PF3D7_1466300	26S proteasome regulatory subunit RPN2, putative (RPN2)	1172	3	3	0	0	338					1	4	2	2	3	2							-1.24342					-7.06647	-5.68017	-6.37332	-6.37332	-5.96785	-6.37332
PF3D7_0317600	40S ribosomal protein S11, putative (RPS11)	161	3	2	2	1	121					11	4	4		5	6	7		3			1	-0.285614					-2.68351	-3.69511	-3.69511		-3.47197	-3.28964	-3.13549		-3.98279			-5.0814
PF3D7_0109000	photosensitized INA-labeled protein PHIL1, putative (PHIL1)	224	3	2	1	1	185					47	14	20		2	2	2					8	-0.19129					-1.5615	-2.77259	-2.41591		-4.7185	-4.7185	-4.7185					-3.3322
PF3D7_1237700	conserved protein, unknown function	210	3	2	1	1	139	3				18	9	8		4	1	3					2	-0.412634	-4.2485				-2.45674	-3.14988	-3.26767		-3.96081	-5.34711	-4.2485					-4.65396
PF3D7_1105100	histone H2B (H2B)	117	3	2	0	2	459					25	10	8		4	11					1	3	1.36688					-1.5433	-2.45959	-2.68273		-3.37588	-2.36428					-4.76217	-3.66356
PF3D7_0408700	sporozoite micronemal protein essential for cell traversal (PLP1)	842	3	2	0	1	1106					32	16	8		4	5					1		0.272725					-3.27004	-3.96319	-4.65634		-5.34949	-5.12634					-6.73578
PF3D7_1310700	RNA-binding protein, putative	143	3	2	0	1	178					22	5	14		9	4						3	0.218939					-1.8718	-3.35341	-2.32379		-2.76562	-3.57655						-3.86423
PF3D7_1311800	M1-family alanyl aminopeptidase (M1AAP)	1085	3	2	0	0	1014					53	15	9		4	4							-0.0676771					-3.01904	-4.28129	-4.79211		-5.60304	-5.60304
PF3D7_0814600	conserved Plasmodium protein, unknown function	393	3	2	0	0	711					37	20	7		3	1							0.592863					-2.36289	-2.97808	-4.0279		-4.8752	-5.97381
PF3D7_0627500	protein DJ-1 (DJ1)	189	3	2	0	0	255					15	15	9		3	2							0.299517					-2.5337	-2.5337	-3.04452		-4.14313	-4.5486
PF3D7_1460600	inner membrane complex sub-compartment protein 3 (ISP3)	148	3	2	0	0	234					25	11	14		2	1							0.458109					-1.77834	-2.59932	-2.35815		-4.30407	-4.99721
PF3D7_1028900	inner membrane complex protein 1m, putative (IMC1m)	369	3	2	0	0	198					15	12	8		5	6							-0.62253					-3.20275	-3.42589	-3.83136		-4.30136	-4.11904
PF3D7_1219700	raf kinase inhibitor (RKIP)	190	3	2	0	0	167					23	3	3		3	1							-0.12903					-2.11153	-4.14841	-4.14841		-4.14841	-5.24702
PF3D7_0721600	40S ribosomal protein S5, putative	195	3	1	1	0	108					23	8	4		4		5						-0.590868					-2.13751	-3.19356	-3.88671		-3.88671		-3.66356
PF3D7_0503400	actin-depolymerizing factor 1 (ADF1)	122	3	1	0	2	529					72	7	7	3							2	9	1.46697					-0.527355	-2.85811	-2.85811	-3.70541							-4.11087	-2.6068
PF3D7_1204300	eukaryotic translation initiation factor 5A (EIF5A)	161	3	1	0	1	110					25	6	9		2							7	-0.380924					-1.86253	-3.28964	-2.88418		-4.38826							-3.13549
PF3D7_1142500	60S ribosomal protein L28 (RPL28)	127	3	1	0	1	87					6	6	8			2						2	-0.378279					-3.05243	-3.05243	-2.76475			-4.15104						-4.15104
PF3D7_0922500	phosphoglycerate kinase (PGK)	416	3	1	0	0	535					14	14	6			2							0.251581					-3.39163	-3.39163	-4.23893			-5.33754
PF3D7_0708400	heat shock protein 90 (HSP90)	745	3	1	0	0	494					12	7	5		2								-0.410849					-4.12848	-4.66747	-5.00395		-5.92024
PF3D7_0209500	conserved Plasmodium protein, unknown function	504	3	1	0	0	443					18	3	2			1							-0.129006					-3.3322	-5.12396	-5.52943			-6.22258
PF3D7_0513300	purine nucleoside phosphorylase (PNP)	245	3	1	0	0	368					2	12	5		4								0.406825					-4.80811	-3.01635	-3.89182		-4.11496
PF3D7_1037300	ADP/ATP transporter on adenylate translocase (ADT)	301	3	1	0	0	339					14	8	7			2							0.11889					-3.06805	-3.62767	-3.7612			-5.01396
PF3D7_1347500	DNA/RNA-binding protein Alba 4 (ALBA4)	372	3	1	0	0	330					18	17	7			1							-0.119801					-3.02852	-3.08568	-3.97298			-5.91889
PF3D7_1117700	GTP-binding nuclear protein ran/tc4 (RAN)	214	3	1	0	0	252					21	21	14			2							0.163453					-2.32145	-2.32145	-2.72692			-4.67283
PF3D7_0714000	histone H2B variant (H2B.Z)	123	3	1	0	0	191					1	2	2			3							0.440089					-4.81218	-4.11904	-4.11904			-3.71357
PF3D7_0512600	ras-related protein Rab-1B (RAB1b)	200	3	1	0	0	80					8	2	2		2								-0.916291					-3.21888	-4.60517	-4.60517		-4.60517
PF3D7_1238000	COPI associated protein, putative	148	3	1	0	0	41					13	4	5			2							-1.28364					-2.43226	-3.61092	-3.38777			-4.30407
PF3D7_0422400	40S ribosomal protein S19 (RPS19)	170	3	0	1	0	98					8	8	7				1						-0.550831					-3.05636	-3.05636	-3.18989				-5.1358
PF3D7_1222700	glideosome-associated protein 45 (GAP45)	204	3	0	0	2	260					29	6	13								1	3	0.242562					-1.95082	-3.52636	-2.75317								-5.31812	-4.21951
PF3D7_0405900	apical sushi protein (ASP)	731	3	0	0	2	241					1	5	9							2	3		-1.10962					-6.59441	-4.98498	-4.39719							-5.90127	-5.4958
PF3D7_1323700	glideosome associated protein with multiple membrane spans 1 (GAPM1)	303	3	0	0	1	416					43	6	1								1		0.316952					-1.95253	-3.92197	-5.71373								-5.71373
PF3D7_0322000	peptidyl-prolyl cis-trans isomerase (CYP19A)	171	3	0	0	1	220					58	30	23									7	0.251964					-1.08122	-1.74047	-2.00617									-3.19575
PF3D7_1409400	conserved Plasmodium membrane protein, unknown function	262	3	0	0	1	114					37	15	13									5	-0.832146					-1.95743	-2.86029	-3.0034									-3.95891
PF3D7_0828800	GPI-anchored micronemal antigen (GAMA)	738	3	0	0	0	650					17	19	14										-0.126971					-3.77073	-3.6595	-3.96489
PF3D7_0827900	protein disulfide isomerase (PDI8)	483	3	0	0	0	494					6	8	2										0.0225189					-4.38826	-4.10058	-5.48687
PF3D7_0618500	malate dehydrogenase (MDH)	313	3	0	0	0	461					17	17	17										0.387195					-2.91299	-2.91299	-2.91299
PF3D7_1468700	eukaryotic initiation factor 4A (eIF4A)	398	3	0	0	0	435					3	2	2										0.088894					-4.88784	-5.2933	-5.2933
PF3D7_1120100	phosphoglycerate mutase, putative (PGM1)	250	3	0	0	0	417					13	23	17										0.511625					-2.95651	-2.38597	-2.68825
PF3D7_1343000	phosphoethanolamine N-methyltransferase (PMT)	266	3	0	0	0	326					3	23	10										0.203401					-4.48488	-2.448	-3.28091
PF3D7_1003600	inner membrane complex protein 1c, putative (IMC1c)	281	3	0	0	0	326					2	4	1										0.148543					-4.94521	-4.25206	-5.63835
PF3D7_1244600	ADP-ribosylation factor GTPase-activating protein, putative (ARFGAP)	332	3	0	0	0	282					3	22	4										-0.163228					-4.70652	-2.71409	-4.41884
PF3D7_1017500	conserved Plasmodium protein, unknown function	134	3	0	0	0	271					11	5	3										0.704279					-2.49994	-3.2884	-3.79923
PF3D7_0919000	nucleosome assembly protein (NAPS)	269	3	0	0	0	255					2	1	2										-0.0534478					-4.90156	-5.59471	-4.90156
PF3D7_0803800	proteasome subunit beta type-4	265	3	0	0	0	232					12	5	8										-0.132992					-3.09482	-3.97029	-3.50029
PF3D7_1235600	serine hydroxymethyltransferase (SHMT)	442	3	0	0	0	215					5	1	5										-0.720672					-4.48187	-6.09131	-4.48187
PF3D7_1011000	inner membrane complex sub-compartment protein 1 (ISP1)	144	3	0	0	0	199					40	10	8										0.323492					-1.28093	-2.66723	-2.89037
PF3D7_0518900	conserved Plasmodium protein, unknown function	194	3	0	0	0	198					15	18	11										0.0204089					-2.55981	-2.37749	-2.86996
PF3D7_1412300	nuclear transport factor 2, putative (NTF2)	125	3	0	0	0	178					18	7	3										0.35347					-1.93794	-2.8824	-3.7297
PF3D7_1236600	p25-alpha family protein, putative	152	3	0	0	0	178					11	12	9										0.157903					-2.62599	-2.53897	-2.82666
PF3D7_1366500	nucleoside diphosphate kinase (NDK)	149	3	0	0	0	177					7	6	3										0.172203					-3.05804	-3.21219	-3.90533
PF3D7_1129000	spermidine synthase (SpdSyn)	321	3	0	0	0	170					5	2	4										-0.635643					-4.162	-5.07829	-4.38515
PF3D7_1457200	thioredoxin 1 (TRX1)	104	3	0	0	0	169					7	1	1										0.485508					-2.69848	-4.64439	-4.64439
PF3D7_1430700	NADP-specific glutamate dehydrogenase (GDH2)	510	3	0	0	0	143					5	3	2										-1.27157					-4.62497	-5.1358	-5.54126
PF3D7_0913200	elongation factor 1-beta (EF-1beta)	276	3	0	0	0	120					9	2	2										-0.832909					-3.42318	-4.92725	-4.92725
PF3D7_1439800	vesicle-associated membrane protein, putative	241	3	0	0	0	110					14	6	8										-0.784317					-2.84574	-3.69304	-3.40536
PF3D7_1421200	40S ribosomal protein S25 (RPS25)	105	3	0	0	0	106					5	3	2										0.00947874					-3.04452	-3.55535	-3.96081
PF3D7_0307200	60S ribosomal protein L7, putative	257	3	0	0	0	96					14	2	3										-0.984728					-2.91002	-4.85593	-4.45046
PF3D7_1140400	conserved Plasmodium protein, unknown function	167	3	0	0	0	79					25	17	14										-0.748546					-1.89912	-2.28478	-2.47894
PF3D7_1361100	protein transport protein Sec24A (SEC24A)	940	3	0	0	0	76					7	4	2										-2.51515					-4.89997	-5.45959	-6.15273
PF3D7_0517000	60S ribosomal protein L12, putative	165	3	0	0	0	73					9	4	2										-0.815486					-2.90872	-3.71965	-4.4128
PF3D7_0305700	ubiquitin-conjugating enzyme E2, putative	142	3	0	0	0	59					15	16	2										-0.87829					-2.24778	-2.18324	-4.26268
PF3D7_0806500	DnaJ protein, putative	675	3	0	0	0	57					6	6	2										-2.47166					-4.72295	-4.72295	-5.82157
PF3D7_1019400	60S ribosomal protein L30e, putative	108	3	0	0	0	53					8	2	4										-0.711839					-2.60269	-3.98898	-3.29584
PF3D7_0816200	vacuolar protein sorting-associated protein 2, putative (VPS2)	209	3	0	0	0	48					4	5	2										-1.47113					-3.95604	-3.7329	-4.64919
PF3D7_0316700	HVA22/TB2/DP1 family protein, putative	221	3	0	0	0	48					7	1	2										-1.52696					-3.45225	-5.39816	-4.70502
PF3D7_1028600	conserved Plasmodium protein, unknown function	171	3	0	0	0	37					6	5	6										-1.53075					-3.3499	-3.53223	-3.3499
PF3D7_1211400	heat shock protein DNAJ homologue Pfj4 (PfJ4)	244	3	0	0	0	36					3	5	1										-1.91365					-4.39856	-3.88773	-5.49717
PF3D7_0821400	conserved Plasmodium protein, unknown function	124	3	0	0	0	18					6	6	7										-1.92991					-3.02852	-3.02852	-2.87437
PF3D7_1411100.1,PF3D7_1411100.2	conserved Plasmodium membrane protein, unknown function	373	3	0	0	0	18					5	6	5										-3.03121					-4.31214	-4.12982	-4.31214
PF3D7_1230100	thioredoxin-like associated protein 1, putative (TLAP1)	524	2	3	1	0	257					3	10		1	2	2	1						-0.712416					-5.16288	-3.95891		-6.26149	-5.56834	-5.56834	-6.26149
PF3D7_1252100	rhoptry neck protein 3 (RON3)	2215	2	3	0	1	867					11		4	2	3	28					1		-0.937969					-5.30511		-6.31671	-7.00986	-6.6044	-4.3708					-7.70301
PF3D7_0524000	karyopherin beta (KASbeta)	1123	2	3	0	0	407					12	3		2	12	4							-1.01495					-4.53885	-5.92515		-6.33061	-4.53885	-5.63746
PF3D7_0703500	erythrocyte membrane-associated antigen	2299	2	3	0	0	290					11	1		3	6	2							-2.07035					-5.34233	-7.74023		-6.64162	-5.94847	-7.04708
PF3D7_0214100	protein transport protein sec31 (SEC31)	1471	2	3	0	0	231					12		6	2	3	11							-1.85128					-4.80879		-5.50194	-6.60055	-6.19509	-4.8958
PF3D7_0617800	histone H2A (H2A)	132	2	3	0	0	121			2				8	1	2	2							-0.0870114			-4.18965				-2.80336	-4.8828	-4.18965	-4.18965
PF3D7_1466100	protein phosphatase containing kelch-like domains (PPKL)	889	2	2	0	0	286					2	4			2	6							-1.13411					-6.09695	-5.4038			-6.09695	-4.99834
PF3D7_0820700	2-oxoglutarate dehydrogenase E1 component (KDH)	1038	2	2	0	0	249					7		2		6	3							-1.4276					-4.99914		-6.2519		-5.15329	-5.84644
PF3D7_0209800	ATP-dependent RNA helicase UAP56 (UAP56)	457	2	2	0	0	243					6	3			1	4							-0.631622					-4.33292	-5.02607			-6.12468	-4.73839
PF3D7_1116900	conserved Plasmodium protein, unknown function	212	2	2	0	0	203					16	3			4	2							-0.0433803					-2.584	-4.25797			-3.97029	-4.66344
PF3D7_1012400	hypoxanthine-guanine phosphoribosyltransferase (HGPRT)	231	2	2	0	0	203					22	3			6	4							-0.129212					-2.35138	-4.34381			-3.65066	-4.05612
PF3D7_1338300	elongation factor 1-gamma, putative	411	2	2	0	0	198					13	7			3	4							-0.730326					-3.45364	-4.07268			-4.91998	-4.6323
PF3D7_1409800	CUGBP Elav-like family member 2, putative (CELF2)	514	2	2	0	0	186					5	5			4	2							-1.01648					-4.63279	-4.63279			-4.85593	-5.54908
PF3D7_1215000	thioredoxin peroxidase 2 (Trx-Px2)	216	2	2	0	0	102					11	3			4	1							-0.750306					-2.97738	-4.27667			-3.98898	-5.37528
PF3D7_1023000	conserved Plasmodium membrane protein, unknown function	413	2	2	0	0	77					15	1			7	4							-1.67964					-3.3154	-6.02345			-4.07754	-4.63715
PF3D7_0316600	formate-nitrite transporter (FNT)	309	2	2	0	0	58					6	4			15	7							-1.6729					-3.94158	-4.34705			-3.02529	-3.78743
PF3D7_0605900	long chain polyunsaturated fatty acid elongation enzyme, putative	293	2	2	0	0	48					14		1		2	6							-1.80897					-3.04112		-5.68017		-4.98703	-3.88841
PF3D7_1360800	falcilysin (FLN)	1193	2	1	0	0	1007					13	7			2								-0.169496					-4.51928	-5.13832			-6.39108
PF3D7_0619400	cell division cycle protein 48 homologue, putative	828	2	1	0	0	809					31	15				2							-0.0232142					-3.28503	-4.01096				-6.02587
PF3D7_0207300	serine repeat antigen 8 (SERA8)	679	2	1	0	0	796					12	4				1							0.158978					-4.03571	-5.13433				-6.52062
PF3D7_1342800	phosphoenolpyruvate carboxykinase (PEPCK)	583	2	1	0	0	300					3	1			2								-0.664405					-5.26957	-6.36819			-5.67504
PF3D7_1134100	protein disulfide isomerase (PDI-11)	423	2	1	0	0	292					1	4			3								-0.370618					-6.04737	-4.66108			-4.94876
PF3D7_1229500	T-complex protein 1 subunit gamma (CCT3)	542	2	1	0	0	285					2	3			3								-0.642777					-5.60212	-5.19665			-5.19665
PF3D7_0922200	S-adenosylmethionine synthetase (SAMS)	402	2	1	0	0	273					9	11			2								-0.38698					-3.79923	-3.59856			-5.3033
PF3D7_1454700	6-phosphogluconate dehydrogenase, decarboxylating, putative	468	2	1	0	0	155					3		4	2									-1.10504					-5.04986		-4.76217	-5.45532
PF3D7_1302800	40S ribosomal protein S7, putative	194	2	1	0	0	89					2	6			1								-0.779222					-4.57471	-3.4761			-5.26786
PF3D7_1132800	aquaglyceroporin (AQP)	258	2	1	0	0	74					5		2		2								-1.24889					-3.94352		-4.85981		-4.85981
PF3D7_0930300	merozoite surface protein 1 (MSP1)	1720	2	1	0	0	10					3		1			2							-5.14749					-6.35147		-7.45008			-6.75693
PF3D7_1460700	60S ribosomal protein L27 (RPL27)	146	2	0	1	0	81					3		2				2						-0.589157					-3.88499		-4.29046				-4.29046
PF3D7_1004000	60S ribosomal protein L13, putative	202	2	0	1	0	35					4		3				4						-1.75292					-3.92197		-4.20966				-3.92197
PF3D7_0206200	pantothenate transporter (PAT)	565	2	0	0	1	130					2	2									2		-1.46929					-5.64368	-5.64368									-5.64368
PF3D7_0626800	pyruvate kinase (PyrK)	511	2	0	0	0	442					4	14											-0.14506					-4.85008	-3.59731
PF3D7_1223100	cAMP-dependent protein kinase regulatory subunit (PKAr)	441	2	0	0	0	349					3	2											-0.233973					-4.99043	-5.3959
PF3D7_0520900	S-adenosyl-L-homocysteine hydrolase (SAHH)	479	2	0	0	0	319					4	2											-0.406509					-4.78541	-5.47855
PF3D7_0909500	subpellicular microtubule protein 1, putative (SPM1)	489	2	0	0	0	264	1				5	1											-0.616413	-6.19236				-4.58292	-6.19236
PF3D7_1136500.1,PF3D7_1136500.2	casein kinase 1	323	2	0	0	0	240					2	3											-0.297013					-5.08451	-4.67904
PF3D7_1446200	M17 leucyl aminopeptidase (LAP)	605	2	0	0	0	221					3	1											-1.00707					-5.30662	-6.40523
PF3D7_1431600	ATP-specific succinyl-CoA synthetase beta subunit, putative	462	2	0	0	0	214					1	1											-0.769589					-6.13556	-6.13556
PF3D7_0320300	T-complex protein 1 subunit epsilon (CCT5)	535	2	0	0	0	210					1	7											-0.935159					-6.28227	-4.33636
PF3D7_1463500	fam-a protein	258	2	0	0	0	201					12	9											-0.249655					-3.06805	-3.35574
PF3D7_1242800	rab specific GDP dissociation inhibitor (rabGDI)	459	2	0	0	0	193					3	3											-0.86636					-5.03044	-5.03044
PF3D7_1457000	signal peptide peptidase (SPP)	412	2	0	0	0	149					8		3										-1.01708					-3.94158		-4.92241
PF3D7_0826700	receptor for activated c kinase (RACK)	323	2	0	0	0	134					2	2											-0.879813					-5.08451	-5.08451
PF3D7_1325100	phosphoribosylpyrophosphate synthetase	437	2	0	0	0	127					1	4											-1.23575					-6.07993	-4.69364
PF3D7_1026800	40S ribosomal protein S2 (RPS2)	263	2	0	0	0	111					4		1										-0.862624					-4.18586		-5.57215
PF3D7_0931800	proteasome subunit beta type-6, putative	282	2	0	0	0	106					9	1											-0.978468					-3.44468	-5.64191
PF3D7_1146300	conserved Plasmodium protein, unknown function	244	2	0	0	0	101						2	7										-0.882048						-4.80402	-3.55126
PF3D7_0922900	3-oxoacyl-[acyl-carrier-protein] reductase (FabG)	301	2	0	0	0	100					5	1											-1.10194					-4.09767	-5.70711
PF3D7_1020900	ADP-ribosylation factor (ARF1)	181	2	0	0	0	80					7	9											-0.81647					-3.25259	-3.00127
PF3D7_1006800	RNA-binding protein, putative	246	2	0	0	0	70					4	2											-1.25684					-4.11904	-4.81218
PF3D7_0508200	longevity-assurance (LAG1) protein, putative	355	2	0	0	0	59					6		5										-1.79458					-4.08036		-4.26268
PF3D7_0106800	ras-related protein Rab-5C (RAB5c)	214	2	0	0	0	56					7	2											-1.34062					-3.42007	-4.67283
PF3D7_1230400	ATP-dependent protease subunit ClpQ (ClpQ)	207	2	0	0	0	48					2	3											-1.46152					-4.63957	-4.23411
PF3D7_1135900	3-oxo-5-alpha-steroid 4-dehydrogenase, putative	296	2	0	0	0	48					4	1											-1.81916					-4.30407	-5.69036
PF3D7_1351400	60S ribosomal protein L17, putative	203	2	0	0	0	45					6		7										-1.50654					-3.52145		-3.3673
PF3D7_0308500	activator of Hsp90 ATPase, putative	140	2	0	0	0	38					2	2											-1.30406					-4.2485	-4.2485
PF3D7_1229400	macrophage migration inhibitory factor (MIF)	116	2	0	0	0	35					6	4											-1.19824					-2.96183	-3.3673
PF3D7_1111500	acylphosphatase, putative	129	2	0	0	0	32					2	1											-1.39408					-4.16667	-4.85981
PF3D7_1326000	conserved Plasmodium protein, unknown function	163	2	0	0	0	31					2		5										-1.65976					-4.4006		-3.48431
PF3D7_1003500	40S ribosomal protein S20e, putative	118	2	0	0	0	30					10	3											-1.36949					-2.4681	-3.67207
PF3D7_1331300	signal peptidase 21 kDa subunit (SP21)	184	2	0	0	0	15					5	1											-2.50689					-3.6055	-5.21494
PF3D7_0308200	T-complex protein 1 subunit eta (CCT7)	539	1	3	1	0	214					1			2	1	3		1					-0.92374					-6.28972			-5.59657	-6.28972	-5.1911		-6.28972
PF3D7_0708800	heat shock protein 110 (HSP110c)	873	1	3	0	0	550					18			2	5	9							-0.462017					-3.88156			-6.07879	-5.1625	-4.57471
PF3D7_0622800	leucine--tRNA ligase, putative	1447	1	3	0	0	447					16			4	1	4							-1.17469					-4.50466			-5.89095	-7.27725	-5.89095
PF3D7_1329100	myosin C (MyoC)	2160	1	3	0	0	388					10			4	2	14							-1.71686					-5.37528			-6.29157	-6.98472	-5.03881
PF3D7_0810600	RNA helicase, putative	941	1	3	0	0	370					7			2	10	19							-0.93344					-4.90103			-6.1538	-4.54436	-3.9025
PF3D7_1431900	inner membrane complex suture component, putative (ISC3)	732	1	3	0	0	147						2		3	4	1							-1.60535						-5.90263		-5.49717	-5.20949	-6.59578
PF3D7_1455300	conserved Plasmodium protein, unknown function	610	1	2	2	0	114			2						23	66	22	6					-1.67726			-5.72031						-3.27796	-2.2238	-3.32242	-4.6217
PF3D7_0108300	conserved Plasmodium protein, unknown function	2221	1	2	1	0	311					5				5	13	1						-1.96592					-6.09627				-6.09627	-5.14076	-7.70571
PF3D7_0612800	6-cysteine protein (P12p)	371	1	2	1	0	44						2			9	8	2						-2.13201						-5.22305			-3.71898	-3.83676	-5.22305
PF3D7_0806800	vacuolar proton translocating ATPase subunit A, putative	1053	1	2	0	1	380					3				3	4					2		-1.01923					-5.86079				-5.86079	-5.5731					-6.26625
PF3D7_0729900	dynein heavy chain, putative	5065	1	2	0	0	1073					53				17	6							-1.5519					-4.55982				-5.6969	-6.73835
PF3D7_1327300	conserved Plasmodium protein, unknown function	1795	1	2	0	0	725	5						4		4	55							-0.906589	-5.88332						-6.10647		-6.10647	-3.48543
PF3D7_1211000	kinesin-7, putative	1844	1	2	0	0	645					19				2	19							-1.05044					-4.57525				-6.82655	-4.57525
PF3D7_1349200	glutamate--tRNA ligase, putative	863	1	2	0	0	337					6			3		1							-0.940332					-4.96866			-5.6618		-6.76041
PF3D7_0910000	SET domain protein, putative (SET4)	1114	1	2	0	0	198					8				6	3							-1.72745					-4.93627				-5.22395	-5.9171
PF3D7_1107800	transcription factor with AP2 domain(s) (ApiAP2)	1828	1	2	0	0	194					3				9	17							-2.24312					-6.41237				-5.31375	-4.67776
PF3D7_1321600	phosphodiesterase gamma, putative (PDEgamma)	769	1	2	0	0	144					1				3	2							-1.67528					-6.64509				-5.54648	-5.95194
PF3D7_1442300	tRNA binding protein, putative	402	1	2	0	0	138					3				4	2							-1.0692					-4.89784				-4.61016	-5.3033
PF3D7_0903200	ras-related protein RAB7 (RAB7)	206	1	2	0	0	106					6				2	3							-0.664437					-3.53612				-4.63473	-4.22926
PF3D7_1332900	isoleucine--tRNA ligase, putative	1272	1	1	0	0	448					2				1								-1.04355					-6.4552				-7.14835
PF3D7_0302900	exportin-1, putative	1254	1	1	0	0	351					4				3								-1.27331					-5.7478				-6.03548
PF3D7_0613300	rhoptry protein ROP14 (ROP14)	1422	1	1	0	0	296					2					1							-1.56946					-6.56667					-7.25982
PF3D7_1110700	actin-like protein, putative (ALP1)	378	1	1	0	0	284					12				1								-0.28592					-3.44999				-5.93489
PF3D7_1318300	conserved Plasmodium protein, unknown function	1840	1	1	0	0	227					1					4							-2.09257					-7.51752					-6.13123
PF3D7_0217100	ATP synthase F1, alpha subunit	551	1	1	0	0	224						3				1							-0.900089						-5.21312				-6.31173
PF3D7_0932800	conserved Plasmodium protein, unknown function	1342	1	1	0	0	207					2				2								-1.8692					-6.50877				-6.50877
PF3D7_0717500	calcium-dependent protein kinase 4 (CDPK4)	528	1	1	0	0	201						1			3								-0.965791						-6.2691			-5.17048
PF3D7_1131500	conserved Plasmodium protein, unknown function	256	1	1	0	0	200					2					3							-0.24686					-4.85203					-4.44657
PF3D7_0624600	SNF2 helicase, putative (ISWI)	2719	1	1	0	0	196					2					2							-2.6299					-7.21487					-7.21487
PF3D7_0416800	small GTP-binding protein sar1 (SAR1)	192	1	1	0	0	159					9				2								-0.188591					-3.06027				-4.56435
PF3D7_0410500	conserved Plasmodium protein, unknown function	213	1	1	0	0	139					14					3							-0.426818					-2.72223					-4.26268
PF3D7_1105800	conserved Plasmodium protein, unknown function	266	1	1	0	0	125					5			2									-0.755183					-3.97406			-4.89035
PF3D7_0519200	V-type proton ATPase 16 kDa proteolipid subunit	165	1	1	0	0	104					12					2							-0.461555					-2.62104					-4.4128
PF3D7_0518300	proteasome subunit beta type-1, putative	240	1	1	0	0	104	1				2				2								-0.836248	-5.48064				-4.78749				-4.78749
PF3D7_0828900	conserved Plasmodium protein, unknown function	185	1	1	0	0	85						5			2								-0.777705						-3.61092			-4.52721
PF3D7_0108000	proteasome subunit beta type-3, putative	218	1	1	0	0	73					3					1							-1.09404					-4.28588					-5.3845
PF3D7_1330400.1	ER lumen protein retaining receptor 1, putative	284	1	1	0	0	22					3				2								-2.55793					-4.55036				-4.95583
PF3D7_0628300	choline/ethanolaminephosphotransferase, putative (CEPT)	391	1	1	0	0	19					2					1							-3.02427					-5.27556					-5.96871
PF3D7_1341200	60S ribosomal protein L18, putative	184	1	0	1	0	82					1						1						-0.808217					-5.21494						-5.21494
PF3D7_1105000	histone H4 (H4)	103	1	0	0	0	641	5					6											1.8283	-3.02529					-2.84297
PF3D7_1113000	conserved Plasmodium protein, unknown function	5922	1	0	0	0	626					4												-2.24708					-7.30014
PF3D7_1219100	clathrin heavy chain, putative	1997	1	0	0	0	432					3												-1.53098					-6.50079
PF3D7_0610800	transketolase (TK)	672	1	0	0	0	409					2												-0.496543					-5.81711
PF3D7_1435300	NAD(P)H-dependent glutamate synthase, putative	3106	1	0	0	0	399					12												-2.05213					-5.55618
PF3D7_0511800	inositol-3-phosphate synthase (INO1)	604	1	0	0	0	364					2												-0.50642					-5.71043
PF3D7_0915400	6-phosphofructokinase (PFK9)	1418	1	0	0	0	345					15												-1.41346					-4.54895
PF3D7_1116700	dipeptidyl aminopeptidase 1 (DPAP1)	700	1	0	0	0	321					10												-0.779639					-4.2485
PF3D7_1342500	sporozoite protein essential for cell traversal (SPECT1)	245	1	0	0	0	293						3											0.178914						-4.40265
PF3D7_1011800	PRE-binding protein (PREBP)	1139	1	0	0	0	277							2										-1.41389							-6.34476
PF3D7_0306800	T-complex protein 1 subunit beta (CCT2)	533	1	0	0	0	275					3												-0.66175					-5.17991
PF3D7_1357800	T-complex protein 1 subunit delta (CCT4)	529	1	0	0	0	266						2											-0.687492						-5.57784
PF3D7_0826100	E3 ubiquitin-protein ligase, putative	8591	1	0	0	0	260					2												-3.49779					-8.36532
PF3D7_0214000	T-complex protein 1 subunit theta (CCT8)	542	1	0	0	0	246					3												-0.789934					-5.19665
PF3D7_1361900	proliferating cell nuclear antigen 1 (PCNA1)	274	1	0	0	0	232					4												-0.166391					-4.22683
PF3D7_1029600	adenosine deaminase (ADA)	367	1	0	0	0	228					3												-0.476016					-4.80675
PF3D7_1132200	T-complex protein 1 subunit alpha (TCP1)	544	1	0	0	0	227					4												-0.873999					-4.91265
PF3D7_0106300	calcium-transporting ATPase (ATP6)	1228	1	0	0	0	225					6												-1.69704					-5.32138
PF3D7_1251200	coronin	602	1	0	0	0	220					2												-1.00663					-5.70711
PF3D7_1342100	aconitate hydratase (IRP)	909	1	0	0	0	213					1												-1.45105					-6.81235
PF3D7_1352500	thioredoxin-related protein, putative	208	1	0	0	0	210					16												0.00956945					-2.56495
PF3D7_1213800	proline--tRNA ligase (PRS)	746	1	0	0	0	182					6												-1.41072					-4.82297
PF3D7_1464700	ATP synthase (C/AC39) subunit, putative	382	1	0	0	0	180					7												-0.752464					-3.99951
PF3D7_0517300	serine/arginine-rich splicing factor 1 (SR1)	298	1	0	0	0	179					1												-0.509708					-5.69709
PF3D7_1111600	endonuclease/exonuclease/phosphatase family protein, putative	744	1	0	0	0	179						1											-1.42466						-6.61204
PF3D7_0624000	hexokinase (HK)	493	1	0	0	0	173						5											-1.04722						-4.59107
PF3D7_0717700	serine--tRNA ligase, putative	539	1	0	0	0	164						1											-1.18985						-6.28972
PF3D7_1248900	26S protease regulatory subunit 8, putative (RPT6)	435	1	0	0	0	155					3												-1.03192					-4.97673
PF3D7_0817900	high mobility group protein B2 (HMGB2)	99	1	0	0	0	149	1				1												0.408826	-4.59512				-4.59512
PF3D7_1124600	ethanolamine kinase (EK)	423	1	0	0	0	146						4											-1.06377						-4.66108
PF3D7_1311900	V-type proton ATPase catalytic subunit A (vapA)	611	1	0	0	0	144						1											-1.44528						-6.4151
PF3D7_1461900	valine--tRNA ligase, putative	1090	1	0	0	0	144					1												-2.02412					-6.99393
PF3D7_0413600	26S protease regulatory subunit 6B, putative (RPT3)	392	1	0	0	0	142					4												-1.01543					-4.58497
PF3D7_0720400	ferrodoxin reductase-like protein	642	1	0	0	0	140						2											-1.52295						-5.77144
PF3D7_0722400	GTP-binding protein, putative	393	1	0	0	0	137						2											-1.05383						-5.28066
PF3D7_1130200	60S ribosomal protein P0 (PfP0)	316	1	0	0	0	134						6											-0.857902						-3.96398
PF3D7_0931300	asparagine-rich antigen, putative	305	1	0	0	0	132							2										-0.83751							-5.02716
PF3D7_0406100	V-type proton ATPase subunit B	494	1	0	0	0	124						3											-1.38225						-5.10392
PF3D7_1430300	acid phosphatase, putative	2657	1	0	0	0	113					1												-3.15757					-7.88495
PF3D7_1367700	alanine--tRNA ligase (AlaRS)	1408	1	0	0	0	108					2												-2.56779					-6.55678
PF3D7_1229300	conserved Plasmodium protein, unknown function	990	1	0	0	0	102					9												-2.27273					-4.70048
PF3D7_1447500	inner membrane complex protein, putative (IMC20)	144	1	0	0	0	100					2												-0.364643					-4.27667
PF3D7_0109400	tubulin-specific chaperone a, putative	166	1	0	0	0	99						2											-0.516868						-4.41884
PF3D7_0727400	proteasome subunit alpha type-5, putative	256	1	0	0	0	96					3												-0.980829					-4.44657
PF3D7_0621800	nascent polypeptide associated complex alpha chain, putative	184	1	0	0	0	93					11												-0.682336					-2.81704
PF3D7_0615100	enoyl-acyl carrier reductase (ENR)	432	1	0	0	0	90					2												-1.56862					-5.37528
PF3D7_1304500	small heat shock protein, putative	211	1	0	0	0	87						2											-0.88595						-4.65871
PF3D7_0212300	peptide chain release factor subunit 1, putative	427	1	0	0	0	87					1												-1.59088					-6.05678
PF3D7_1312800	conserved Plasmodium protein, unknown function	2361	1	0	0	0	87			2														-3.30093			-7.07369
PF3D7_0709700	lysophospholipase, putative	368	1	0	0	0	86					47												-1.45374					-2.05794
PF3D7_0307100	40S ribosomal protein S12, putative	141	1	0	0	0	83					5												-0.529919					-3.33932
PF3D7_1410700	conserved Plasmodium protein, unknown function	334	1	0	0	0	78					2												-1.45443					-5.11799
PF3D7_1127600	CRAL/TRIO domain-containing protein, putative	297	1	0	0	0	77						2											-1.34993						-5.00058
PF3D7_1365500	glycine cleavage system T protein, putative (GCVT)	406	1	0	0	0	73						1											-1.71589						-6.00635
PF3D7_1317800	40S ribosomal protein S19 (RPS19)	145	1	0	0	0	72					2												-0.700068					-4.28359
PF3D7_1474800	proteasome subunit alpha type-1, putative	254	1	0	0	0	72						4											-1.26067						-4.15104
PF3D7_0911900	falstatin (ICP)	413	1	0	0	0	72					2												-1.74678					-5.3303
PF3D7_0605100	RNA-binding protein, putative	755	1	0	0	0	72					1												-2.35005					-6.62672
PF3D7_1333400	conserved protein, unknown function	238	1	0	0	0	71						2											-1.20959						-4.77912
PF3D7_0422000	steroid dehydrogenase, putative	321	1	0	0	0	70					5												-1.52295					-4.162
PF3D7_1462700	cytochrome c1 precursor, putative	394	1	0	0	0	69					1												-1.74224					-5.97635
PF3D7_1444300	1-acyl-sn-glycerol-3-phosphate acyltransferase, putative (LPAAT)	292	1	0	0	0	68						1											-1.45725						-5.67675
PF3D7_0419600	ran binding protein 1, putative	280	1	0	0	0	67					5												-1.4301					-4.02535
PF3D7_1474900	trailer hitch homolog, putative (CITH)	328	1	0	0	0	66					2												-1.60336					-5.09987
PF3D7_0812400	karyopherin alpha (KARalpha)	545	1	0	0	0	66						1											-2.11113						-6.30079
PF3D7_0306300	glutaredoxin 1 (GRX1)	111	1	0	0	0	63					7												-0.566395					-2.76362
PF3D7_1438100	secretory complex protein 62 (SEC62)	377	1	0	0	0	62					2												-1.80511					-5.2391
PF3D7_0309600	60S acidic ribosomal protein P2 (PfP2)	112	1	0	0	0	61					2												-0.607625					-4.02535
PF3D7_1331800	60S ribosomal protein L23, putative	139	1	0	0	0	60					1												-0.840129					-4.93447
PF3D7_1020800	dihydrolipoamide acyltransferase component E2 (DLAT)	640	1	0	0	0	59					2												-2.38393					-5.76832
PF3D7_0817500	protein kinase c inhibitor-like protein, putative	185	1	0	0	0	56					2												-1.195					-4.52721
PF3D7_1011400	proteasome subunit beta type-5	271	1	0	0	0	55					3												-1.59479					-4.50351
PF3D7_0218500	small nuclear ribonucleoprotein Sm D2, putative (SNRPD2)	101	1	0	0	0	53					4												-0.644829					-3.22883
PF3D7_1346100	protein transport protein SEC61 subunit alpha (SEC61)	472	1	0	0	0	53					1												-2.18669					-6.15698
PF3D7_1426100	basic transcription factor 3b, putative	171	1	0	0	0	52					2												-1.19042					-4.44852
PF3D7_1354400	V-type proton ATPase 21 kDa proteolipid subunit, putative	181	1	0	0	0	52					3												-1.24725					-4.09988
PF3D7_1414300	60S ribosomal protein L10, putative	219	1	0	0	0	50					3												-1.47705					-4.29046
PF3D7_1439400	ubiquinol-cytochrome c reductase iron-sulfur subunit, putative	355	1	0	0	0	49					5												-1.9803					-4.26268
PF3D7_0920500	ADP-ribosylation factor, putative	191	1	0	0	0	48					8												-1.38107					-3.17283
PF3D7_0719600	60S ribosomal protein L11a, putative	173	1	0	0	0	46					2												-1.32465					-4.46014
PF3D7_1021400	endomembrane protein 70, putative	619	1	0	0	0	46					1												-2.59946					-6.42811
PF3D7_0422600	conserved Plasmodium protein, unknown function	140	1	0	0	0	45					3												-1.13498					-3.84303
PF3D7_1132300	nucleic acid binding protein, putative	273	1	0	0	0	44						1											-1.82528						-5.60947
PF3D7_1439700	leucine carboxyl methyltransferase, putative	327	1	0	0	0	42					3												-2.05229					-4.69135
PF3D7_1358700	HVA22-like protein, putative	153	1	0	0	0	41					4												-1.31687					-3.64414
PF3D7_0413700	lysine decarboxylase-like protein, putative	338	1	0	0	0	40					2												-2.13417					-5.1299
PF3D7_1002900	conserved Plasmodium protein, unknown function	127	1	0	0	0	36					5												-1.26067					-3.23475
PF3D7_0414600	conserved protein, unknown function	235	1	0	0	0	36					2												-1.87607					-4.76644
PF3D7_0813300	conserved Plasmodium protein, unknown function	315	1	0	0	0	36					2												-2.16905					-5.05943
PF3D7_0708700	Cg8 protein	228	1	0	0	0	35					8												-1.874					-3.3499
PF3D7_1246800	signal recognition particle receptor, beta subunit (SRPR-beta)	261	1	0	0	0	34					6												-2.03816					-3.77276
PF3D7_0617300	conserved Plasmodium protein, unknown function	139	1	0	0	0	33					5												-1.43797					-3.32504
PF3D7_0721400	conserved Plasmodium protein, unknown function	214	1	0	0	0	33						3											-1.86947						-4.26736
PF3D7_1121000	palmitoyltransferase, putative (DHHC3)	293	1	0	0	0	30					4												-2.27898					-4.29388
PF3D7_1323100	60S ribosomal protein L6, putative	190	1	0	0	0	28					3												-1.91482					-4.14841
PF3D7_1127200	conserved Plasmodium protein, unknown function	68	1	0	0	0	27					2												-0.923671					-3.52636
PF3D7_0529500	cell cycle regulator protein, putative	179	1	0	0	0	27					2												-1.89155					-4.49424
PF3D7_1360900	polyadenylate-binding protein, putative	389	1	0	0	0	26						3											-2.70548						-4.86497
PF3D7_0513800	ras-related protein Rab-1A (RAB1a)	207	1	0	0	0	24					6												-2.15466					-3.54096
PF3D7_1341900	V-type proton ATPase subunit D, putative	247	1	0	0	0	23					1												-2.37389					-5.50939
PF3D7_1310500	conserved protein, unknown function	205	1	0	0	0	22					1												-2.23197					-5.32301
PF3D7_1330000.1	thioredoxin, putative	206	1	0	0	0	22					3												-2.23683					-4.22926
PF3D7_1315600	CDP-diacylglycerol--inositol 3-phosphatidyltransferase (PIS)	209	1	0	0	0	22					1												-2.25129					-5.34233
PF3D7_0409500	conserved Plasmodium protein, unknown function	398	1	0	0	0	22					2												-2.89541					-5.2933
PF3D7_0320000	protein phosphatase inhibitor 2 (I2)	144	1	0	0	0	20					1												-1.97408					-4.96981
PF3D7_1353600	ER lumen protein retaining receptor (ERD2)	221	1	0	0	0	19					4												-2.45372					-4.01187
PF3D7_0526900	transmembrane emp24 domain-containing protein, putative	214	1	0	0	0	18					2												-2.4756					-4.67283
PF3D7_0520400	conserved Plasmodium protein, unknown function	301	1	0	0	0	18					1												-2.81674					-5.70711
PF3D7_0903100	protein RER1, putative (RER1)	201	1	0	0	0	16					3												-2.53072					-4.20469
PF3D7_1113300	UDP-galactose transporter, putative	343	1	0	0	0	15					4												-3.12968					-4.45144
PF3D7_1105900	conserved Plasmodium membrane protein, unknown function	132	1	0	0	0	14					2												-2.24374					-4.18965
PF3D7_0524700	mitochondrial import receptor subunit tom22, putative (TOM22)	105	1	0	0	0	12					2												-2.16905					-3.96081
PF3D7_1365700	SNARE associated Golgi protein, putative	408	1	0	0	0	12					1												-3.52636					-6.01127
PF3D7_1038000.1,PF3D7_1038000.2	antigen UB05	119	1	0	0	0	11					2												-2.38123					-4.08598
PF3D7_1032500	DER1-like protein, putative (Der1-2)	263	1	0	0	0	10					3												-3.26957					-4.47354
PF3D7_1135300	conserved Plasmodium membrane protein, unknown function	409	1	0	0	0	9					1												-3.81649					-6.01372
PF3D7_1416900	prefoldin subunit 2, putative	147	1	0	0	0	7					3												-3.04452					-3.89182
PF3D7_0528700	peptidyl-prolyl cis-trans isomerase (CYP23)	204	1	0	0	0	7					2												-3.37221					-4.62497
PF3D7_0713700	conserved Plasmodium protein, unknown function	209	0	2	1	0	93									7	2		1					-0.809735									-3.39642	-4.64919		-5.34233
PF3D7_0104100	conserved Plasmodium membrane protein, unknown function	791	0	2	0	0	514									16	24							-0.431075									-3.90071	-3.49524
PF3D7_1437700	succinyl-CoA ligase, putative	973	0	2	0	0	375									1	2							-0.953458									-6.88038	-6.18724
PF3D7_1407600	conserved Plasmodium protein, unknown function	2033	0	2	0	0	225									8	45							-2.20117									-5.53783	-3.81061
PF3D7_0801900	conserved Plasmodium protein, unknown function	4662	0	2	0	0	225									3	4							-3.0311									-7.34859	-7.06091
PF3D7_0812100	conserved Plasmodium protein, unknown function	2651	0	2	0	0	179									1	3							-2.69531									-7.88269	-6.78408
PF3D7_1318700	conserved Plasmodium protein, unknown function	749	0	2	0	0	169								1		6							-1.48884								-6.61874		-4.82698
PF3D7_0322900	40S ribosomal protein S3A, putative	262	0	2	0	0	154								2		2							-0.531392								-4.8752		-4.8752
PF3D7_0507100	60S ribosomal protein L4 (RPL4)	411	0	2	0	0	130									3	2							-1.15106									-4.91998	-5.32545
PF3D7_1219600	aminophospholipid-transporting P-ATPase (ATPase2)	1555	0	2	0	0	122									1	3							-2.54521									-7.34923	-6.25062
PF3D7_1320600	ras-related protein Rab-11A (RAB11a)	216	0	2	0	0	113									4	4							-0.647891									-3.98898	-3.98898
PF3D7_1016000	conserved Plasmodium protein, unknown function	453	0	2	0	0	71									2	17							-1.85321									-5.42274	-3.28268
PF3D7_0926400	monocarboxylate transporter, putative	529	0	2	0	0	59									2	4							-2.19345									-5.57784	-4.88469
PF3D7_1142600	60S ribosomal protein L35ae, putative	140	0	2	0	0	54									1	2							-0.952658									-4.94164	-4.2485
PF3D7_1007700	transcription factor with AP2 domain(s) (ApiAP2)	1597	0	2	0	0	53									3	1							-3.40559									-6.27727	-7.37588
PF3D7_0505800	small ubiquitin-related modifier (SUMO)	100	0	2	0	0	49									2	2							-0.71335									-3.91202	-3.91202
PF3D7_1323000	beta-hydroxyacyl-ACP dehydratase (FabZ)	230	0	2	0	0	6									2	7							-3.64632									-4.74493	-3.49217
PF3D7_1243900	double C2-like domain-containing protein (DOC2)	1846	0	1	3	0	6								13			17	35	32				-5.72902								-4.95583			-4.68756	-3.96543	-4.05504
PF3D7_0724700	conserved Plasmodium protein, unknown function	3489	0	1	1	0	21									14			2					-5.11285									-5.51831			-7.46422
PF3D7_0529800	conserved Plasmodium protein, unknown function	1906	0	1	1	0										22		5															-4.46172		-5.94332
PF3D7_1034900	methionine--tRNA ligase (MRScyt)	889	0	1	0	0	315										3							-1.03752										-5.69148
PF3D7_1103800	CCR4-NOT transcription complex subunit 1, putative (NOT1)	3371	0	1	0	0	272										2							-2.51716										-7.42982
PF3D7_1118300	insulinase, putative	1488	0	1	0	0	260									1								-1.74451									-7.30519
PF3D7_1145400	dynamin-like protein (DYN1)	837	0	1	0	0	253										8							-1.19643										-4.65038
PF3D7_1468100	conserved Plasmodium protein, unknown function	2558	0	1	0	0	247										7							-2.33759										-5.90107
PF3D7_1107300	polyadenylate-binding protein-interacting protein 1, putative (PAIP1)	3334	0	1	0	0	199										2							-2.81862										-7.41878
PF3D7_0405700	lysine decarboxylase, putative	2415	0	1	0	0	191										5							-2.53718										-6.18002
PF3D7_1145100	coatomer subunit gamma, putative (SEC21)	1068	0	1	0	0	168									1								-1.84958									-6.97354
PF3D7_1105400	40S ribosomal protein S4, putative	261	0	1	0	0	136									1								-0.651866									-5.56452
PF3D7_1202200	mitochondrial phosphate carrier protein (MPC)	324	0	1	0	0	125										1							-0.95243										-5.78074
PF3D7_1344800	aspartate carbamoyltransferase (atcasE)	375	0	1	0	0	120									2								-1.13943									-5.23378
PF3D7_1424400	60S ribosomal protein L7-3, putative	283	0	1	0	0	113										1							-0.918059										-5.64545
PF3D7_0706500	conserved Plasmodium protein, unknown function	1706	0	1	0	0	92										1							-2.92012										-7.44191
PF3D7_0516900	60S ribosomal protein L2 (RPL2)	260	0	1	0	0	89										1							-1.07205										-5.56068
PF3D7_1466400	transcription factor with AP2 domain(s) (ApiAP2)	813	0	1	0	0	74										5							-2.39667										-5.09129
PF3D7_1442600	TRAP-like protein (TREP)	3543	0	1	0	0	70									10								-3.92423									-5.87014
PF3D7_0813400	conserved Plasmodium protein, unknown function	659	0	1	0	0	45									2								-2.68406									-5.79758
PF3D7_1025900	conserved Plasmodium protein, unknown function	1331	0	1	0	0	35										3							-3.63834										-6.09507
PF3D7_1321700	splicing factor 1 (SF1)	864	0	1	0	0	24										2							-3.58352										-6.06843
PF3D7_1029400	conserved Plasmodium protein, unknown function	501	0	1	0	0	21										2							-3.17208										-5.52346
PF3D7_0610400	histone H3 (H3)	136	0	1	0	0	14										4							-2.2736										-3.52636
PF3D7_0606800	probable protein, unknown function	299	0	1	0	0	13										3							-3.13549										-4.60183
PF3D7_1026600	conserved Plasmodium protein, unknown function	1692	0	1	0	0	11										5							-5.03577										-5.82423
PF3D7_0308100	conserved Plasmodium protein, unknown function	1711	0	1	0	0	4									15								-6.05854									-4.73678
PF3D7_1133100	conserved membrane protein, unknown function	1057	0	1	0	0											2																	-6.27004
PF3D7_1463400	DNA-directed RNA polymerase III subunit RPC4, putative	336	0	1	0	0										1																	-5.81711
PF3D7_1437300	conserved Plasmodium protein, unknown function	212	0	1	0	0										2																	-4.66344
PF3D7_0320900	histone H2A variant, putative (H2A.Z)	158	0	0	2	0	176											1		6				0.107889											-5.0626		-3.27084
PF3D7_0704600	E3 ubiquitin-protein ligase (UT)	3893	0	0	1	0	218											9						-2.88244											-6.06971
PF3D7_1027300	peroxiredoxin (nPrx)	393	0	0	1	0	217											3						-0.593912											-4.8752
PF3D7_0814200	DNA/RNA-binding protein Alba 1 (ALBA1)	248	0	0	1	0	169											3						-0.38353											-4.41482
PF3D7_0618300	60S ribosomal protein L27a, putative	148	0	0	1	0	56											4						-0.971861											-3.61092
PF3D7_1426000	60S ribosomal protein L21 (RPL21)	161	0	0	1	0	56											1						-1.05605											-5.0814
PF3D7_0731500	erythrocyte binding antigen-175 (EBA175)	1502	0	0	1	0	7											8						-5.36864											-5.23511
PF3D7_1465800	dynein beta chain, putative	6485	0	0	1	0														2																	-8.0841
PF3D7_0600800,PF3D7_1040400	rifin, pseudogene (RIF);rifin (RIF)	355	0	0	1	0													2																	-5.17897
PF3D7_0827400	conserved Plasmodium protein, unknown function	218	0	0	1	0														16																	-2.61191
PF3D7_1469600	biotin carboxylase subunit of acetyl CoA carboxylase, putative (ACC)	3367	0	0	0	1	51																44	-4.18995																-4.33759
PF3D7_1126500	conserved Plasmodium protein, unknown function	1368	0	0	0	1	3															2		-6.12249															-6.52796
PF3D7_1336700	conserved Plasmodium protein, unknown function	158	0	0	0	1																5																	-3.45316
PF3D7_0817700	rhoptry neck protein 5 (RON5)	1156	0	0	0	0	497																	-0.844131
PF3D7_1116000	unspecified product (RON4)	1201	0	0	0	0	363																	-1.19651
PF3D7_1462300	conserved Plasmodium protein, unknown function	1357	0	0	0	0	308																	-1.48293
PF3D7_0525100	acyl-CoA synthetase (ACS10)	673	0	0	0	0	305																	-0.791434
PF3D7_1429800	coatamer beta subunit, putative	1370	0	0	0	0	304																	-1.50554
PF3D7_1108600	endoplasmic reticulum-resident calcium binding protein (ERC)	343	0	0	0	0	298																	-0.140637
PF3D7_0608700	chaperone, putative	543	0	0	0	0	289																	-0.630683
PF3D7_0205900	proteasome 26S regulatory subunit, putative	966	0	0	0	0	286																	-1.21717
PF3D7_1134000	heat shock protein 70 (Hsp70-3)	663	0	0	0	0	284																	-0.847801
PF3D7_1104400	conserved protein, unknown function	424	0	0	0	0	279																	-0.418522
PF3D7_1344200	heat shock protein 110, putative (HSP110)	932	0	0	0	0	278																	-1.20971
PF3D7_1350600	conserved Plasmodium protein, unknown function	261	0	0	0	0	271																	0.0375984
PF3D7_0317100	conserved Plasmodium protein, unknown function	969	0	0	0	0	262																	-1.30792
PF3D7_0214900	rhoptry neck protein 6 (RON6)	950	0	0	0	0	259																	-1.29963
PF3D7_1312600	branched-chain alpha keto-acid dehydrogenase, putative	429	0	0	0	0	237																	-0.593397
PF3D7_1126000	threonine--tRNA ligase (ThrRS)	1013	0	0	0	0	231																	-1.47825
PF3D7_0903400	DEAD/DEAH box helicase, putative	2536	0	0	0	0	231																	-2.39593
PF3D7_0621100	conserved Plasmodium protein, unknown function	1354	0	0	0	0	229																	-1.7771
PF3D7_0606700	coatomer alpha subunit, putative	1512	0	0	0	0	225																	-1.90509
PF3D7_1203700	nucleosome assembly protein (NAPL)	347	0	0	0	0	223																	-0.442153
PF3D7_1015600	heat shock protein 60 (HSP60)	580	0	0	0	0	220																	-0.969401
PF3D7_0802000	glutamate dehydrogenase, putative (GDH3)	1397	0	0	0	0	216																	-1.8668
PF3D7_0721700	secreted ookinete protein, putative (PSOP1)	467	0	0	0	0	210																	-0.799222
PF3D7_0910100	Ran-binding protein, putative	1198	0	0	0	0	208																	-1.75087
PF3D7_0808200	plasmepsin X	573	0	0	0	0	202																	-1.04262
PF3D7_1024100	conserved Plasmodium protein, unknown function	1104	0	0	0	0	200																	-1.70838
PF3D7_0726500	ubiquitin carboxyl-terminal hydrolase, putative	3183	0	0	0	0	200																	-2.76726
PF3D7_1351600	glycerol kinase (GK)	501	0	0	0	0	199																	-0.923301
PF3D7_0722200	rhoptry-associated leucine zipper-like protein 1 (RALP1)	749	0	0	0	0	196																	-1.34062
PF3D7_1238800	acyl-CoA synthetase (ACS11)	792	0	0	0	0	194																	-1.4067
PF3D7_1233600	asparagine and aspartate rich protein 1 (AARP1)	5439	0	0	0	0	194																	-3.33349
PF3D7_1136300	tudor staphylococcal nuclease (TSN)	1098	0	0	0	0	189																	-1.7595
PF3D7_1453800	glucose-6-phosphate dehydrogenase-6-phosphogluconolactonase (G6PDH)	910	0	0	0	0	188																	-1.577
PF3D7_1225800	ubiquitin-activating enzyme E1 (UBA1)	1140	0	0	0	0	188																	-1.80234
PF3D7_1212700	eukaryotic translation initiation factor 3 subunit 10, putative	1377	0	0	0	0	188																	-1.99122
PF3D7_1147800.1,PF3D7_1147800.2	merozoite adhesive erythrocytic binding protein (MAEBL);merozoite adhesive erythrocytic binding protein (MAEBL)	2055	0	0	0	0	185																	-2.40768
PF3D7_1235200	V-type K -independent H -translocating inorganic pyrophosphatase (VP2)	1057	0	0	0	0	184																	-1.74825
PF3D7_0927300	fumarate hydratase, putative	681	0	0	0	0	183																	-1.31408
PF3D7_0320800	ATP-dependent RNA helicase, putative (DOZI)	433	0	0	0	0	182																	-0.866731
PF3D7_0306400	FAD-dependent glycerol-3-phosphate dehydrogenase, putative	653	0	0	0	0	181																	-1.28308
PF3D7_0607000	translation initiation factor IF-2, putative	977	0	0	0	0	181																	-1.68599
PF3D7_1138500	protein phosphatase 2c	924	0	0	0	0	177																	-1.65256
PF3D7_1216600	cell traversal protein for ookinetes and sporozoites (CelTOS)	182	0	0	0	0	173																	-0.0507151
PF3D7_0517400	FACT complex subunit SPT16, putative (FACT-L)	1141	0	0	0	0	173																	-1.88637
PF3D7_0212500	conserved Plasmodium protein, unknown function	3990	0	0	0	0	173																	-3.13825
PF3D7_0413900	ubiquitin carboxyl-terminal hydrolase 13, putative (USP13)	853	0	0	0	0	172																	-1.60127
PF3D7_0806200	conserved Plasmodium membrane protein, unknown function	1018	0	0	0	0	170																	-1.7898
PF3D7_1125800	kelch protein, putative	592	0	0	0	0	169																	-1.25361
PF3D7_1428300	proliferation-associated protein 2g4, putative	377	0	0	0	0	168																	-0.808281
PF3D7_0404400	6-cysteine protein (P36)	379	0	0	0	0	164																	-0.83767
PF3D7_1305300	conserved Plasmodium protein, unknown function	3525	0	0	0	0	164																	-3.06777
PF3D7_0110600	phosphatidylinositol-4-phosphate 5-kinase (PIP5K)	1710	0	0	0	0	162																	-2.35665
PF3D7_0811200	conserved protein, unknown function	1133	0	0	0	0	161																	-1.95122
PF3D7_0619500	acyl-CoA synthetase (ACS12)	1392	0	0	0	0	160																	-2.16332
PF3D7_1232100	60 kDa chaperonin (CPN60)	718	0	0	0	0	159																	-1.50757
PF3D7_1007200	rhoGAP GTPase, putative	593	0	0	0	0	156	3																-1.33534	-5.28658
PF3D7_1110400	asparagine-rich antigen	1483	0	0	0	0	156																	-2.25197
PF3D7_0609000	conserved Plasmodium protein, unknown function	6077	0	0	0	0	156																	-3.66241
PF3D7_0405400	pre-mRNA-processing-splicing factor 8, putative (PRPF8)	3136	0	0	0	0	155																	-3.00728
PF3D7_0711500	regulator of chromosome condensation, putative	688	0	0	0	0	154																	-1.49684
PF3D7_1206200	eukaryotic translation initiation factor 3 subunit 8, putative	984	0	0	0	0	151																	-1.87435
PF3D7_0711000	AAA family ATPase, CDC48 subfamily (Cdc48)	1229	0	0	0	0	151																	-2.09668
PF3D7_0932200	profilin, putative (PFN)	171	0	0	0	0	149																	-0.137717
PF3D7_1463900	conserved Plasmodium membrane protein, unknown function	1071	0	0	0	0	149																	-1.9724
PF3D7_0906400	dynein light intermediate chain 2, cytosolic	837	0	0	0	0	148																	-1.73261
PF3D7_1408700	conserved Plasmodium protein, unknown function	7182	0	0	0	0	147																	-3.8889
PF3D7_1108400	casein kinase 2, alpha subunit (CK2alpha)	335	0	0	0	0	146																	-0.830524
PF3D7_0822600	protein transport protein Sec23 (SEC23)	759	0	0	0	0	145																	-1.65527
PF3D7_0417300	LETM1-like protein, putative	802	0	0	0	0	145																	-1.71037
PF3D7_1423300	serine/threonine protein phosphatase (PP7)	959	0	0	0	0	144																	-1.89608
PF3D7_0730400	conserved Plasmodium protein, unknown function	158	0	0	0	0	143																	-0.0997504
PF3D7_1306400	26S proteasome regulatory subunit, putative	393	0	0	0	0	143																	-1.01096
PF3D7_1104200	chromatin remodeling protein (SNF2L)	1426	0	0	0	0	143																	-2.29978
PF3D7_0807700	serine protease, putative	870	0	0	0	0	142																	-1.81267
PF3D7_1434300	Hsp70/Hsp90 organizing protein (HOP)	564	0	0	0	0	141																	-1.38629
PF3D7_0303000	N-ethylmaleimide sensitive fusion protein (NSF)	783	0	0	0	0	140																	-1.72149
PF3D7_1416500	NADP-specific glutamate dehydrogenase (GDH1)	470	0	0	0	0	139																	-1.21826
PF3D7_1348000	conserved Plasmodium protein, unknown function	1245	0	0	0	0	139																	-2.19242
PF3D7_0517700	eukaryotic translation initiation factor, putative	716	0	0	0	0	138																	-1.64643
PF3D7_1345700	isocitrate dehydrogenase (NADP), mitochondrial precursor (IDH)	468	0	0	0	0	137																	-1.22849
PF3D7_1318800	secretory complex protein 63 (SEC63)	651	0	0	0	0	136																	-1.56585
PF3D7_0823900	dicarboxylate/tricarboxylate carrier (DTC)	318	0	0	0	0	135																	-0.856777
PF3D7_1451800	sortilin, putative	895	0	0	0	0	135																	-1.89155
PF3D7_0422500	pre-mRNA-splicing helicase BRR2, putative (BRR2)	2874	0	0	0	0	135																	-3.05819
PF3D7_1108500	succinyl-CoA synthetase alpha subunit, putative	327	0	0	0	0	132																	-0.907158
PF3D7_1108700	heat shock protein DnaJ homologue Pfj2	540	0	0	0	0	132																	-1.40877
PF3D7_1424100	60S ribosomal protein L5, putative	294	0	0	0	0	131																	-0.808382
PF3D7_1350100	lysine--tRNA ligase, putative (KRS1)	583	0	0	0	0	131																	-1.49299
PF3D7_1021600	deoxyribose-phosphate aldolase, putative	263	0	0	0	0	130																	-0.70462
PF3D7_0707300	rhoptry-associated membrane antigen (RAMA)	861	0	0	0	0	130																	-1.89056
PF3D7_0604500	conserved Plasmodium protein, unknown function	2874	0	0	0	0	130																	-3.09593
PF3D7_1356100	conserved Plasmodium protein, unknown function	964	0	0	0	0	129																	-2.01128
PF3D7_0916700	RNA-binding protein musashi, putative (HoMu)	388	0	0	0	0	128																	-1.10898
PF3D7_0505700	conserved Plasmodium membrane protein, unknown function	924	0	0	0	0	128																	-1.97668
PF3D7_0905900	beta subunit of coatomer complex, putative	1010	0	0	0	0	128																	-2.06568
PF3D7_0215200	conserved Plasmodium protein, unknown function	244	0	0	0	0	127																	-0.652981
PF3D7_1232200	lipoamide dehydrogenase (mLipDH)	512	0	0	0	0	127																	-1.39414
PF3D7_1202600	conserved protein, unknown function	2180	0	0	0	0	127																	-2.84289
PF3D7_1419800.1	glutathione reductase (GR)	500	0	0	0	0	126																	-1.37833
PF3D7_1419800.2	glutathione reductase (GR)	546	0	0	0	0	126																	-1.46634
PF3D7_1012500	phosphoglucomutase, putative	593	0	0	0	0	126																	-1.54891
PF3D7_1125700	kelch protein, putative	669	0	0	0	0	126																	-1.6695
PF3D7_1015200.1,PF3D7_1015200.2,PF3D7_1015200.3	cysteine--tRNA ligase, putative;cysteine--tRNA ligase, putative;cysteine--tRNA ligase, putative	677	0	0	0	0	126																	-1.68139
PF3D7_1420400	glycine--tRNA ligase (GlyRS)	889	0	0	0	0	126																	-1.95382
PF3D7_1445100	histidine--tRNA ligase, putative	1132	0	0	0	0	126																	-2.19546
PF3D7_0516200	40S ribosomal protein S14, putative	151	0	0	0	0	125																	-0.188966
PF3D7_0720700	phosphoinositide-binding protein, putative	2166	0	0	0	0	125																	-2.85232
PF3D7_1311500	26S proteasome regulatory subunit 7, putative	420	0	0	0	0	124																	-1.21997
PF3D7_0706000	conserved Plasmodium protein, unknown function	1229	0	0	0	0	124																	-2.29367
PF3D7_1123500	conserved Plasmodium protein, unknown function	1336	0	0	0	0	124																	-2.37715
PF3D7_0814000	60S ribosomal protein L13-2, putative	215	0	0	0	0	123																	-0.558454
PF3D7_1402300	26S proteasome regulatory subunit (RPN6)	666	0	0	0	0	123																	-1.68911
PF3D7_0717800	conserved Plasmodium protein, unknown function	1530	0	0	0	0	123																	-2.52084
PF3D7_0317300	conserved Plasmodium protein, unknown function	3394	0	0	0	0	123																	-3.31758
PF3D7_1410600	eukaryotic translation initiation factor 2 gamma subunit, putative	465	0	0	0	0	122																	-1.33802
PF3D7_1247500	serine/threonine protein kinase, putative	909	0	0	0	0	122																	-2.00832
PF3D7_1023900	chromodomain-helicase-DNA-binding protein 1 homolog, putative (CHD1)	3328	0	0	0	0	122																	-3.30611
PF3D7_1346300	DNA/RNA-binding protein Alba 2 (ALBA2)	211	0	0	0	0	121																	-0.556068
PF3D7_1352400	conserved Plasmodium protein, unknown function	1594	0	0	0	0	121																	-2.57821
PF3D7_1341500	conserved Plasmodium protein, unknown function	508	0	0	0	0	120																	-1.44299
PF3D7_1003800	U5 small nuclear ribonuclear protein, putative	1235	0	0	0	0	119																	-2.3397
PF3D7_1353900	proteasome subunit, putative	241	0	0	0	0	118																	-0.714112
PF3D7_1459000	ATP-dependent RNA helicase DBP5 (DBP5)	741	0	0	0	0	118																	-1.83732
PF3D7_1464600	phosphatase, putative	1442	0	0	0	0	118																	-2.5031
PF3D7_1453700	co-chaperone p23 (P23)	275	0	0	0	0	117																	-0.854597
PF3D7_0934800	cAMP-dependent protein kinase catalytic subunit (PKAc)	342	0	0	0	0	117																	-1.07264
PF3D7_0904800	replication protein A1, small fragment	484	0	0	0	0	117																	-1.41991
PF3D7_0211800	asparagine--tRNA ligase, putative	610	0	0	0	0	117																	-1.65129
PF3D7_0926700	NAD synthase, putative	839	0	0	0	0	117																	-1.97004
PF3D7_1123100	calcium-dependent protein kinase 7 (CDPK7)	2265	0	0	0	0	117																	-2.96316
PF3D7_0807500	proteasome subunit alpha, putative	260	0	0	0	0	116																	-0.807091
PF3D7_1457300	conserved Plasmodium protein, unknown function	639	0	0	0	0	116																	-1.70631
PF3D7_0528100	beta adaptin protein, putative	929	0	0	0	0	116																	-2.08052
PF3D7_0407600	conserved Plasmodium protein, unknown function	1212	0	0	0	0	116																	-2.34644
PF3D7_0912400	conserved Plasmodium protein, unknown function	446	0	0	0	0	115																	-1.35539
PF3D7_0727800	cation transporting ATPase, putative	1918	0	0	0	0	115																	-2.81411
PF3D7_0807900	tyrosine--tRNA ligase (TyrRS)	373	0	0	0	0	114																	-1.18538
PF3D7_1346400	conserved Plasmodium protein, unknown function	5988	0	0	0	0	114																	-3.96131
PF3D7_0802800	serine/threonine protein phosphatase, putative	604	0	0	0	0	113																	-1.67619
PF3D7_1120000	conserved Plasmodium protein, unknown function	1070	0	0	0	0	113																	-2.24803
PF3D7_1417000	conserved Plasmodium protein, unknown function	382	0	0	0	0	112																	-1.22692
PF3D7_1006200	DNA/RNA-binding protein Alba 3 (ALBA3)	107	0	0	0	0	111																	0.0367014
PF3D7_1242700	40S ribosomal protein S17, putative	137	0	0	0	0	110																	-0.219501
PF3D7_1017100	conserved Plasmodium protein, unknown function	310	0	0	0	0	110																	-1.03609
PF3D7_1437900	HSP40, subfamily A, putative	424	0	0	0	0	110																	-1.34925
PF3D7_0932300	M18 aspartyl aminopeptidase (M18AAP)	570	0	0	0	0	110																	-1.64516
PF3D7_1224200	conserved Plasmodium protein, unknown function	819	0	0	0	0	110																	-2.0076
PF3D7_1110500	vacuolar sorting protein 35, putative	1050	0	0	0	0	110																	-2.25607
PF3D7_0716800	eukaryotic translation initiation factor 3 37.28 kDa subunit, putative	327	0	0	0	0	109																	-1.09861
PF3D7_1320800	dihydrolipamide succinyltransferase component of 2-oxoglutarate dehydrogenase complex	421	0	0	0	0	109																	-1.35128
PF3D7_0504600	3-methyl-2-oxobutanoate dehydrogenase (lipoamide), putative	381	0	0	0	0	108																	-1.26067
PF3D7_0404500	6-cysteine protein (P52)	478	0	0	0	0	108																	-1.48748
PF3D7_1338100	proteasome regulatory subunit, putative	503	0	0	0	0	108																	-1.53846
PF3D7_1013300	conserved Plasmodium protein, unknown function	628	0	0	0	0	107																	-1.76971
PF3D7_1331700	glutamine--tRNA ligase, putative	918	0	0	0	0	106																	-2.15876
PF3D7_1130400	26S proteasome regulatory subunit 6a, putative	439	0	0	0	0	105																	-1.43054
PF3D7_1007900	eukaryotic translation initiation factor 3 subunit 7, putative	543	0	0	0	0	105																	-1.64315
PF3D7_1352700	P-loop containing nucleoside triphosphate hydrolase, putative	2533	0	0	0	0	105																	-3.1832
PF3D7_0318500	conserved Plasmodium protein, unknown function	4981	0	0	0	0	105																	-3.85943
PF3D7_1342000	40S ribosomal protein S6, putative	306	0	0	0	0	104																	-1.07919
PF3D7_0309500	asparagine synthetase, putative	610	0	0	0	0	104																	-1.76907
PF3D7_1412500	actin II (ACT2)	376	0	0	0	0	103																	-1.29486
PF3D7_0920700	conserved Plasmodium protein, unknown function	593	0	0	0	0	103																	-1.75047
PF3D7_0816600	ClpB protein, putative (ClpB1)	1070	0	0	0	0	103																	-2.34068
PF3D7_1442900	guanine nucleotide exchange factor, putative (SEC7)	3384	0	0	0	0	103																	-3.49208
PF3D7_1408600	40S ribosomal protein S8e, putative	218	0	0	0	0	102																	-0.759522
PF3D7_0807800	proteasome subunit alpha type 5, putative	481	0	0	0	0	102																	-1.55089
PF3D7_0303200	HAD superfamily protein, putative	1162	0	0	0	0	102																	-2.43293
PF3D7_1019000	eukaryotic translation initiation factor subunit eIF2A, putative	2405	0	0	0	0	100																	-3.18013
PF3D7_1441400	FACT complex subunit SSRP1, putative (FACT-S)	506	0	0	0	0	99																	-1.63142
PF3D7_1346000	dynactin subunit 2, putative	695	0	0	0	0	99																	-1.94879
PF3D7_0922800	conserved Plasmodium protein, unknown function	4255	0	0	0	0	99																	-3.76073
PF3D7_1027800	60S ribosomal protein L3 (RPL3)	386	0	0	0	0	98																	-1.37087
PF3D7_0815200	importin beta, putative	877	0	0	0	0	98																	-2.19154
PF3D7_1470900	20S proteasome beta 4 subunit, putative	195	0	0	0	0	97																	-0.698289
PF3D7_1439900	triosephosphate isomerase (TIM)	248	0	0	0	0	97																	-0.938718
PF3D7_1008400	26S proteasome regulatory subunit 4, putative	448	0	0	0	0	97																	-1.53008
PF3D7_1436600	cGMP-dependent protein kinase (PKG)	853	0	0	0	0	97																	-2.17405
PF3D7_1365900	60S ribosomal protein L40/UBI, putative	128	0	0	0	0	96																	-0.287682
PF3D7_0419700	apical merozoite protein (Pf34)	325	0	0	0	0	96																	-1.21948
PF3D7_1426200	arginine methyltransferase 1 (PRMT1)	401	0	0	0	0	96																	-1.42961
PF3D7_1017900	26s proteasome regulatory subunit p55, putative	467	0	0	0	0	96																	-1.58198
PF3D7_1445900	DEAD/DEAH box ATP-dependent RNA helicase, putative	527	0	0	0	0	96																	-1.70285
PF3D7_1436000	glucose-6-phosphate isomerase (GPI)	579	0	0	0	0	95																	-1.80743
PF3D7_0516700	ubiquitin carboxyl-terminal hydrolase 2, putative	1332	0	0	0	0	95																	-2.64056
PF3D7_0616500	TRAP-like protein (TLP)	1371	0	0	0	0	95																	-2.66942
PF3D7_1427900	conserved protein, unknown function	281	0	0	0	0	94																	-1.09506
PF3D7_0933600	mitochondrial-processing peptidase subunit beta, putative (MAS1)	484	0	0	0	0	94																	-1.63879
PF3D7_0812500	RNA binding protein, putative	958	0	0	0	0	94																	-2.32155
PF3D7_1454400	aminopeptidase P (APP)	777	0	0	0	0	93																	-2.12284
PF3D7_1129900	transporter, putative	609	0	0	0	0	92																	-1.89003
PF3D7_0802200	1-cys peroxiredoxin (1-CysPxn)	220	0	0	0	0	91																	-0.882768
PF3D7_1022700	phospholipid scramblase 1, putative	275	0	0	0	0	90																	-1.11696
PF3D7_0311800	conserved protein, unknown function	609	0	0	0	0	90																	-1.91201
PF3D7_1351700	alveolin, putative (ALV6)	1318	0	0	0	0	90																	-2.68406
PF3D7_1434800	mitochondrial acidic protein MAM33, putative	252	0	0	0	0	89																	-1.04079
PF3D7_1447000	40S ribosomal protein S2, putative	272	0	0	0	0	89																	-1.11717
PF3D7_1030500	26S proteasome regulatory subunit, putative	393	0	0	0	0	89																	-1.48517
PF3D7_1416100	root hair defective 3 GTP-binding protein (RHD3) homolog, putative	937	0	0	0	0	89																	-2.35405
PF3D7_1458300	conserved Plasmodium protein, unknown function	1528	0	0	0	0	89																	-2.84308
PF3D7_1438000	eukaryotic translation initiation factor eIF2A, putative	661	0	0	0	0	88																	-2.01642
PF3D7_1008900	adenylate kinase (AK1)	242	0	0	0	0	87																	-1.02303
PF3D7_0510300	conserved Plasmodium protein, unknown function	246	0	0	0	0	86																	-1.05098
PF3D7_0611300	conserved Plasmodium protein, unknown function	280	0	0	0	0	86																	-1.18044
PF3D7_1461400	conserved Plasmodium protein, unknown function	322	0	0	0	0	86																	-1.3202
PF3D7_1455500	gamma-adaptin, putative	1081	0	0	0	0	86																	-2.53129
PF3D7_0905100	nucleoporin NUP100/NSP100, putative (NUP100)	2112	0	0	0	0	86																	-3.20104
PF3D7_0318200	DNA-directed RNA polymerase II, putative	2457	0	0	0	0	86																	-3.35235
PF3D7_0523100	mitochondrial processing peptidase alpha subunit, putative	534	0	0	0	0	85																	-1.83774
PF3D7_0417200	bifunctional dihydrofolate reductase-thymidylate synthase (DHFR-TS)	608	0	0	0	0	85																	-1.96752
PF3D7_1206800	conserved Plasmodium protein, unknown function	727	0	0	0	0	85																	-2.14628
PF3D7_0627800	acetyl-CoA synthetase, putative	997	0	0	0	0	85																	-2.4621
PF3D7_0316800	40S ribosomal protein S15A, putative	130	0	0	0	0	84																	-0.436718
PF3D7_0814900	Fe-superoxide dismutase (FeSOD)	198	0	0	0	0	84																	-0.85745
PF3D7_0612100	eukaryotic translation initiation factor 3 subunit L, putative	656	0	0	0	0	84																	-2.05534
PF3D7_1354200	inositol-polyphosphate 5-phosphatase, putative	803	0	0	0	0	84																	-2.25754
PF3D7_0814700	conserved Plasmodium protein, unknown function	306	0	0	0	0	83																	-1.30474
PF3D7_0103900	parasite-infected erythrocyte surface protein (PIEPS15)	575	0	0	0	0	83																	-1.93553
PF3D7_1020300	cytoplasmic dynein intermediate chain, putative	769	0	0	0	0	83																	-2.22625
PF3D7_1218500	conserved Plasmodium protein, unknown function	1061	0	0	0	0	83																	-2.54813
PF3D7_1315900	exportin 1-like protein, putative	1232	0	0	0	0	83																	-2.69755
PF3D7_0212400	conserved Plasmodium membrane protein, unknown function	4091	0	0	0	0	83																	-3.8977
PF3D7_1446600	centrin-2 (CEN2)	168	0	0	0	0	82																	-0.717245
PF3D7_1324800	dihydrofolate synthase/folylpolyglutamate synthase (DHFS-FPGS)	522	0	0	0	0	82																	-1.85095
PF3D7_1018600	conserved Plasmodium protein, unknown function	1904	0	0	0	0	82																	-3.14499
PF3D7_0728000	eukaryotic translation initiation factor 2 alpha subunit, putative	329	0	0	0	0	81																	-1.40161
PF3D7_1126200	40S ribosomal protein S18, putative	156	0	0	0	0	80																	-0.667829
PF3D7_1115600	peptidyl-prolyl cis-trans isomerase (CYP19B)	195	0	0	0	0	80																	-0.890973
PF3D7_1222100	conserved Plasmodium protein, unknown function	518	0	0	0	0	80																	-1.86795
PF3D7_0823800	DnaJ protein, putative	655	0	0	0	0	80																	-2.10261
PF3D7_1434200	calmodulin (CAM)	149	0	0	0	0	79																	-0.634498
PF3D7_1106000	RuvB DNA helicase, putative (RUVB2)	475	0	0	0	0	79																	-1.79387
PF3D7_0505200	actin-like protein, putative (ALP2b)	565	0	0	0	0	79																	-1.96738
PF3D7_1121100	conserved Plasmodium protein, unknown function	1544	0	0	0	0	79																	-2.97268
PF3D7_1410300	conserved Plasmodium protein, unknown function	4405	0	0	0	0	79																	-4.02105
PF3D7_1103100	60S acidic ribosomal protein P1, putative	118	0	0	0	0	78																	-0.413976
PF3D7_0518200	SWIB/MDM2 domain-containing protein, putative	131	0	0	0	0	78																	-0.518488
PF3D7_1129200	26S proteasome regulatory subunit, putative	393	0	0	0	0	78																	-1.6171
PF3D7_0310300	phosphoglycerate mutase, putative	1165	0	0	0	0	78																	-2.70377
PF3D7_0719700	40S ribosomal protein S10, putative	137	0	0	0	0	77																	-0.576176
PF3D7_0715000	4-nitrophenylphosphatase (PNPase)	322	0	0	0	0	77																	-1.43075
PF3D7_1330600	elongation factor Tu, putative	505	0	0	0	0	77																	-1.88075
PF3D7_1022500	citrate synthase, mitochondrial precursor, putative	563	0	0	0	0	77																	-1.98947
PF3D7_1140000	carbonic anhydrase (CA)	600	0	0	0	0	77																	-2.05312
PF3D7_0608800	ornithine aminotransferase (OAT)	414	0	0	0	0	76																	-1.69513
PF3D7_0527200	ubiquitin carboxyl-terminal hydrolase, putative	605	0	0	0	0	76																	-2.0745
PF3D7_1431700	60S ribosomal protein L14, putative	165	0	0	0	0	75																	-0.788457
PF3D7_1368100	proteasome regulatory subunit, putative	311	0	0	0	0	75																	-1.4223
PF3D7_1113400	ubiquitin domain containing protein	388	0	0	0	0	75																	-1.64352
PF3D7_1208900	conserved Plasmodium protein, unknown function	1442	0	0	0	0	74																	-2.96972
PF3D7_1144900	Rab GTPase 6 (RAB6)	207	0	0	0	0	73																	-1.04226
PF3D7_0907600	translation initiation factor SUI1, putative	818	0	0	0	0	73																	-2.4164
PF3D7_1117100	deubiquinating/deneddylating enzyme (UCH54)	465	0	0	0	0	72																	-1.86537
PF3D7_1033700	bromodomain protein, putative	488	0	0	0	0	72																	-1.91365
PF3D7_1423700	conserved Plasmodium protein, unknown function	1558	0	0	0	0	72																	-3.07449
PF3D7_1147000	sporozoite asparagine-rich protein (SLARP)	2940	0	0	0	0	72																	-3.7095
PF3D7_0608500	proteasome subunit alpha type 2, putative	235	0	0	0	0	71																	-1.19691
PF3D7_1128100	cochaperone prefoldin complex subunit, putative	248	0	0	0	0	71																	-1.25075
PF3D7_0527100	ubiquitin-conjugating enzyme E2 N, putative (UBC13)	152	0	0	0	0	70																	-0.775385
PF3D7_1451700	protein phosphatase 2b regulatory subunit, putative	177	0	0	0	0	70																	-0.927654
PF3D7_1340700	Rab GTPase 11b (RAB11b)	229	0	0	0	0	70																	-1.18523
PF3D7_0823200	RNA binding protein, putative	286	0	0	0	0	70																	-1.4075
PF3D7_0626700	conserved protein, unknown function	372	0	0	0	0	70																	-1.6704
PF3D7_1034400	flavoprotein subunit of succinate dehydrogenase (SDHA)	631	0	0	0	0	70																	-2.19881
PF3D7_1230700	protein transport protein Sec13, putative	822	0	0	0	0	70																	-2.46325
PF3D7_1123900	splicing factor, putative	145	0	0	0	0	69																	-0.742627
PF3D7_0418200	golgi organization and biogenesis factor, putative	429	0	0	0	0	69																	-1.82735
PF3D7_1116400	ER membrane protein Sec12 (SEC12)	485	0	0	0	0	69																	-1.95004
PF3D7_1209400	conserved Plasmodium protein, unknown function	792	0	0	0	0	69																	-2.44045
PF3D7_1369500	conserved Plasmodium protein, unknown function	1106	0	0	0	0	69																	-2.7744
PF3D7_1211900	non-SERCA-type Ca2 -transporting P-ATPase (ATP4)	1264	0	0	0	0	69																	-2.90793
PF3D7_0520000	40S ribosomal protein S9, putative	189	0	0	0	0	68																	-1.02224
PF3D7_0923900	RNA binding protein, putative	202	0	0	0	0	68																	-1.08876
PF3D7_0217900	conserved Plasmodium protein, unknown function	519	0	0	0	0	68																	-2.0324
PF3D7_1118500	box C/D snoRNP rRNA 2O-methylation factor, putative	594	0	0	0	0	68																	-2.16737
PF3D7_0628100	HECT-domain (ubiquitin-transferase), putative	10287	0	0	0	0	68																	-5.01913
PF3D7_1358800	40S ribosomal protein S15 (RPS15)	151	0	0	0	0	67																	-0.812587
PF3D7_0507700	nuclear protein localization protein 4, putative (NPL4)	531	0	0	0	0	67																	-2.07007
PF3D7_1023800	conserved Plasmodium protein, unknown function	757	0	0	0	0	67																	-2.42467
PF3D7_0903500	conserved Plasmodium protein, unknown function	1384	0	0	0	0	67																	-3.02804
PF3D7_1142100	conserved Plasmodium protein, unknown function	2738	0	0	0	0	67																	-3.71029
PF3D7_1328100	proteasome subunit beta type 7 precursor, putative	270	0	0	0	0	66																	-1.40877
PF3D7_0621200	pyridoxine biosynthesis protein PDX1 (PDX1)	301	0	0	0	0	66																	-1.51746
PF3D7_0629200	DnaJ protein, putative	380	0	0	0	0	66																	-1.75052
PF3D7_1249100	conserved Plasmodium protein, unknown function	392	0	0	0	0	65																	-1.79687
PF3D7_0617200	conserved Plasmodium protein, unknown function	446	0	0	0	0	65																	-1.92593
PF3D7_0616800	malate:quinone oxidoreductase, putative	521	0	0	0	0	65																	-2.08136
PF3D7_1029700	conserved Plasmodium protein, unknown function	776	0	0	0	0	65																	-2.47977
PF3D7_1308200	carbamoyl phosphate synthetase (cpsSII)	2375	0	0	0	0	65																	-3.59837
PF3D7_1446500	conserved Plasmodium protein, unknown function	3001	0	0	0	0	65																	-3.83231
PF3D7_1338200	60S ribosomal protein L6-2, putative	221	0	0	0	0	64																	-1.23928
PF3D7_0315100	translation initiation factor 4E (eIF4E)	227	0	0	0	0	64																	-1.26607
PF3D7_1432100	conserved protein, unknown function	289	0	0	0	0	64																	-1.50754
PF3D7_1419200	thioredoxin-like protein, putative	671	0	0	0	0	64																	-2.34989
PF3D7_1320000	rhoptry protein 2, putative (PRP2)	1258	0	0	0	0	64																	-2.9784
PF3D7_1443000	serine/threonine protein kinase (SRPK2)	1268	0	0	0	0	64																	-2.98631
PF3D7_0826500	ubiquitin conjugation factor E4 B, putative (UBE4B)	1326	0	0	0	0	64																	-3.03104
PF3D7_1353800	proteasome subunit, putative	246	0	0	0	0	63																	-1.3622
PF3D7_0212600	secreted protein altered thrombospondin repeat protein (SPATR)	250	0	0	0	0	63																	-1.37833
PF3D7_1002700	conserved Plasmodium protein, unknown function	944	0	0	0	0	63																	-2.70699
PF3D7_1222500	ATP-binding protein, putative	247	0	0	0	0	62																	-1.38225
PF3D7_1363400	polyubiquitin binding protein, putative (DOA1)	905	0	0	0	0	62																	-2.6808
PF3D7_1004300	zinc finger, C3HC4 type, putative	1130	0	0	0	0	62																	-2.90284
PF3D7_1426700	phosphoenolpyruvate carboxylase, putative (PEPC)	1148	0	0	0	0	62																	-2.91864
PF3D7_1433500	DNA topoisomerase II, putative	1472	0	0	0	0	62																	-3.16724
PF3D7_1231100	Rab GTPase 2 (RAB2)	213	0	0	0	0	61																	-1.25042
PF3D7_0512700	orotate phosphoribosyltransferase (OPRT)	281	0	0	0	0	61																	-1.52748
PF3D7_1404700	conserved Plasmodium protein, unknown function	290	0	0	0	0	61																	-1.55901
PF3D7_1362200	RuvB-like helicase (RUVB3)	483	0	0	0	0	61																	-2.06914
PF3D7_1010600	eukaryotic translation initiation factor 2 beta subunit, putative	222	0	0	0	0	60																	-1.30833
PF3D7_0317000	proteasome component C8, putative	252	0	0	0	0	60																	-1.43508
PF3D7_0109800	phenylalanine--tRNA ligase, putative	575	0	0	0	0	60																	-2.26003
PF3D7_1136400	conserved Plasmodium protein, unknown function	886	0	0	0	0	60																	-2.69237
PF3D7_0813900	40S ribosomal protein S16, putative	144	0	0	0	0	59																	-0.892276
PF3D7_1033400	haloacid dehalogenase-like hydrolase, putative	288	0	0	0	0	59																	-1.58542
PF3D7_1142800	conserved Plasmodium protein, unknown function	297	0	0	0	0	59																	-1.61619
PF3D7_1121700	protein GCN20 (GCN20)	815	0	0	0	0	59																	-2.62565
PF3D7_0919800	TLD domain containing protein	1078	0	0	0	0	59																	-2.90533
PF3D7_1234800	Splicing factor 3B subunit 3, putative (SF3B3)	1329	0	0	0	0	59																	-3.11464
PF3D7_0511500	RNA pseudouridylate synthase, putative	10061	0	0	0	0	59																	-5.13888
PF3D7_1436900	histidine triad protein, putative	200	0	0	0	0	58																	-1.23787
PF3D7_1414000	26S proteasome regulatory subunit RPN13, putative (RPN13)	253	0	0	0	0	58																	-1.47295
PF3D7_0312400	glycogen synthase kinase 3 (GSK3)	440	0	0	0	0	58																	-2.02633
PF3D7_1125100	vacuolar membrane protein-related, putative	496	0	0	0	0	58																	-2.14613
PF3D7_1104000	phenylalanyl-tRNA synthetase beta chain, putative	623	0	0	0	0	58																	-2.3741
PF3D7_1303700	conserved Plasmodium protein, unknown function	1045	0	0	0	0	58																	-2.89133
PF3D7_1366300	conserved Plasmodium protein, unknown function	4136	0	0	0	0	58																	-4.26704
PF3D7_0417500	memo-like protein	296	0	0	0	0	57																	-1.64731
PF3D7_1403900	phosphatase, putative	298	0	0	0	0	57																	-1.65404
PF3D7_1368200	RNAse L inhibitor protein, putative	619	0	0	0	0	57																	-2.38505
PF3D7_0903600.1	conserved Plasmodium protein, unknown function	760	0	0	0	0	57																	-2.59027
PF3D7_1025000	formin 2, putative	980	0	0	0	0	57																	-2.8445
PF3D7_1312900	eukaryotic translation initation factor 4 gamma, putative (EIF4G)	1255	0	0	0	0	57																	-3.09184
PF3D7_1021100	conserved Plasmodium protein, unknown function	1761	0	0	0	0	57																	-3.43059
PF3D7_1241200	conserved Plasmodium protein, unknown function	2309	0	0	0	0	57																	-3.70152
PF3D7_0907700	subunit of proteaseome activator complex, putative	279	0	0	0	0	56																	-1.60586
PF3D7_0912900	26S proteasome regulatory subunit, putative	338	0	0	0	0	56																	-1.79769
PF3D7_1354500	adenylosuccinate synthetase (adsS)	442	0	0	0	0	56																	-2.06596
PF3D7_0626400	Sec14 domain containing protein	1159	0	0	0	0	56																	-3.02996
PF3D7_0807600	conserved Plasmodium protein, unknown function	1334	0	0	0	0	56																	-3.17059
PF3D7_0611800	conserved Plasmodium protein, unknown function	3248	0	0	0	0	56																	-4.06044
PF3D7_1128200	multiprotein bridging factor type 1, putative (MBF1)	136	0	0	0	0	55																	-0.905322
PF3D7_1103700	casein kinase II beta chain (CK2beta1)	245	0	0	0	0	55																	-1.49393
PF3D7_1362100	14-3-3 protein (14-3-3II)	273	0	0	0	0	55																	-1.60214
PF3D7_0103800	actin-related protein (ARP1)	380	0	0	0	0	55																	-1.93284
PF3D7_1030200	conserved Plasmodium protein, unknown function	450	0	0	0	0	55																	-2.10191
PF3D7_1359400	rRNA associated RNA binding protein, putative	509	0	0	0	0	55																	-2.22511
PF3D7_0815400	conserved Plasmodium protein, unknown function	160	0	0	0	0	54																	-1.08619
PF3D7_1014700	prohibitin, putative	304	0	0	0	0	54																	-1.72804
PF3D7_0217500	calcium-dependent protein kinase 1 (CDPK1)	524	0	0	0	0	54																	-2.27251
PF3D7_1012600	GMP synthetase (GMPS)	555	0	0	0	0	54																	-2.32998
PF3D7_0102900	aspartate--tRNA ligase	626	0	0	0	0	54																	-2.45037
PF3D7_1116800	heat shock protein 101 (HSP101)	906	0	0	0	0	54																	-2.82006
PF3D7_0311300	phosphatidylinositol 3- and 4-kinase, putative	953	0	0	0	0	54																	-2.87063
PF3D7_0627700	transportin	1147	0	0	0	0	54																	-3.05592
PF3D7_0108700	secreted ookinete protein, putative (PSOP24)	1152	0	0	0	0	54																	-3.06027
PF3D7_1455200.1	methyltransferase, putative	205	0	0	0	0	53																	-1.35272
PF3D7_1114100.1	rhomboid protease ROM1 (ROM1)	278	0	0	0	0	53																	-1.65733
PF3D7_1414400	serine/threonine protein phosphatase (PP1)	304	0	0	0	0	53																	-1.74674
PF3D7_0527500	Hsc70-interacting protein (HIP)	458	0	0	0	0	53																	-2.15658
PF3D7_0630600	conserved Plasmodium protein, unknown function	935	0	0	0	0	53																	-2.87025
PF3D7_0922100	ubiquitin-like protein, putative	1542	0	0	0	0	53																	-3.37054
PF3D7_1414500	atypical protein kinase, ABC-1 family, putative (ABCk2)	2758	0	0	0	0	53																	-3.95197
PF3D7_1404100	cytochrome c, putative	115	0	0	0	0	52																	-0.793688
PF3D7_0508800	single-stranded DNA-binding protein (SSB)	284	0	0	0	0	52																	-1.69773
PF3D7_1311300	ATP synthase subunit gamma, mitochondrial	311	0	0	0	0	52																	-1.78855
PF3D7_1218000	thrombospondin-related apical membrane protein (TRAMP)	352	0	0	0	0	52																	-1.91239
PF3D7_0919100	DnaJ protein, putative	370	0	0	0	0	52																	-1.96226
PF3D7_1366900	conserved Plasmodium protein, unknown function	685	0	0	0	0	52																	-2.57818
PF3D7_0811000	cullin-like protein, putative	829	0	0	0	0	52																	-2.76898
PF3D7_1010700	dolichyl-phosphate-mannose protein mannosyltransferase, putative	223	0	0	0	0	51																	-1.47535
PF3D7_1333800	conserved Plasmodium protein, unknown function	234	0	0	0	0	51																	-1.5235
PF3D7_1342400	casein kinase II beta chain (CK2beta2)	385	0	0	0	0	51																	-2.02142
PF3D7_0303700	dihydrolipoamide acyltransferase, putative	448	0	0	0	0	51																	-2.17297
PF3D7_1137300	conserved Plasmodium membrane protein, unknown function	689	0	0	0	0	51																	-2.60342
PF3D7_0728700	alpha/beta hydrolase, putative	720	0	0	0	0	51																	-2.64743
PF3D7_0710200	conserved Plasmodium protein, unknown function	2910	0	0	0	0	51																	-4.04408
PF3D7_0502300	conserved Plasmodium protein, unknown function	287	0	0	0	0	50																	-1.74746
PF3D7_1124700	GrpE protein homolog, mitochondrial, putative (MGE1)	301	0	0	0	0	50																	-1.79509
PF3D7_1415300	RNA-binding protein Nova-1, putative	337	0	0	0	0	50																	-1.90806
PF3D7_1110200	pre-mRNA-processing factor 6, putative (PRPF6)	1329	0	0	0	0	50																	-3.28016
PF3D7_1248700	conserved Plasmodium protein, unknown function	1989	0	0	0	0	50																	-3.68336
PF3D7_1323400	60S ribosomal protein L23 (RPL23)	190	0	0	0	0	49																	-1.3552
PF3D7_1441200	60S ribosomal protein L1, putative	217	0	0	0	0	49																	-1.48808
PF3D7_0904000	GTPase activator, putative	426	0	0	0	0	49																	-2.16262
PF3D7_1025300	conserved Plasmodium protein, unknown function	922	0	0	0	0	49																	-2.93472
PF3D7_1349100	nucleoside diphosphate hydrolase, putative	196	0	0	0	0	48																	-1.40691
PF3D7_1414800	small nuclear ribonucleoprotein-associated protein B, putative (SNRPB)	201	0	0	0	0	48																	-1.4321
PF3D7_0415900	60S ribosomal protein L15, putative	205	0	0	0	0	48																	-1.45181
PF3D7_1303200.1	SNARE protein, putative (VAMP8)	208	0	0	0	0	48																	-1.46634
PF3D7_0813200	CS domain protein, putative	313	0	0	0	0	48																	-1.875
PF3D7_0303400	palmitoyl transferase (AnkDHHC)	616	0	0	0	0	48																	-2.55205
PF3D7_0810800	dihydropteroate synthetase (DHPS)	706	0	0	0	0	48																	-2.68841
PF3D7_1037100	pyruvate kinase 2 (PyKII)	745	0	0	0	0	48																	-2.74218
PF3D7_1120500	tRNA nucleotidyltransferase, putative	791	0	0	0	0	48																	-2.8021
PF3D7_0518500	ATP-dependent RNA helicase DDX23, putative (DDX23)	1123	0	0	0	0	48																	-3.15256
PF3D7_1244100	N-alpha-acetyltransferase 15, NatA auxiliary subunit, putative	1296	0	0	0	0	48																	-3.29584
PF3D7_0726400	conserved Plasmodium membrane protein, unknown function	4944	0	0	0	0	48																	-4.63473
PF3D7_0519400	40S ribosomal protein S24, putative	133	0	0	0	0	47																	-1.0402
PF3D7_0927100	conserved Plasmodium protein, unknown function	192	0	0	0	0	47																	-1.40735
PF3D7_1434400	conserved Plasmodium membrane protein, unknown function	285	0	0	0	0	47																	-1.80234
PF3D7_0929200	RNA binding protein, putative	289	0	0	0	0	47																	-1.81628
PF3D7_1422900	14-3-3 protein, putative	425	0	0	0	0	47																	-2.20194
PF3D7_0626300	3-oxoacyl-acyl-carrier protein synthase I/II (FabB/FabF)	473	0	0	0	0	47																	-2.30895
PF3D7_0909100	conserved Plasmodium membrane protein, unknown function	742	0	0	0	0	47																	-2.7592
PF3D7_1468900	conserved Plasmodium protein, unknown function	813	0	0	0	0	47																	-2.85058
PF3D7_1132000	ubiquitin-like protein, putative	882	0	0	0	0	47																	-2.93204
PF3D7_0804500	conserved Plasmodium membrane protein, unknown function	6034	0	0	0	0	47																	-4.85502
PF3D7_0722900	conserved Plasmodium protein, unknown function	312	0	0	0	0	46																	-1.91436
PF3D7_0106100	vacuolar ATP synthase subunit c, putative	383	0	0	0	0	46																	-2.11939
PF3D7_0909200	GDP-fucose protein O-fucosyltransferase 2, putative (POFUT2)	469	0	0	0	0	46																	-2.32196
PF3D7_0621900	conserved Plasmodium protein, unknown function	776	0	0	0	0	46																	-2.82551
PF3D7_0416400	histone acetyltransferase, putative (HAT1)	1259	0	0	0	0	46																	-3.30943
PF3D7_0215700	DNA-directed RNA polymerase II second largest subunit, putative	1340	0	0	0	0	46																	-3.37178
PF3D7_0406900	conserved Plasmodium protein, unknown function	1751	0	0	0	0	46																	-3.6393
PF3D7_1026500	unspecified product	70	0	0	0	0	45																	-0.441833
PF3D7_0304200	EH (Eps15 homology) protein (PAST1)	525	0	0	0	0	45																	-2.45674
PF3D7_0727200	cysteine desulfurase, putative (NFS)	553	0	0	0	0	45																	-2.5087
PF3D7_1145000	conserved Plasmodium protein, unknown function	577	0	0	0	0	45																	-2.55118
PF3D7_0729500	mRNA (N6-adenosine)-methyltransferase, putative	760	0	0	0	0	45																	-2.82666
PF3D7_1323200	vacuolar ATP synthase subunit g, putative	123	0	0	0	0	44																	-1.02799
PF3D7_0927900	phosphatidylserine decarboxylase (PSD)	353	0	0	0	0	44																	-2.08228
PF3D7_1473200	DnaJ protein, putative	454	0	0	0	0	44																	-2.33391
PF3D7_1008100	conserved Plasmodium protein, unknown function	3853	0	0	0	0	44																	-4.47242
PF3D7_1303000	conserved Plasmodium protein, unknown function	117	0	0	0	0	43																	-1.00097
PF3D7_0319600	elongation factor 1 (EF-1), putative	156	0	0	0	0	43																	-1.28866
PF3D7_1309100	60S ribosomal protein L24, putative	162	0	0	0	0	43																	-1.3264
PF3D7_1251300	thymidylate kinase (TMK)	210	0	0	0	0	43																	-1.58591
PF3D7_0319900	conserved Plasmodium protein, unknown function	314	0	0	0	0	43																	-1.98819
PF3D7_1203500	Sua5/YciO/YrdC family protein, putative	556	0	0	0	0	43																	-2.55957
PF3D7_1329400	AMP deaminase, putative	693	0	0	0	0	43																	-2.77983
PF3D7_1459600	conserved Plasmodium protein, unknown function	801	0	0	0	0	43																	-2.92466
PF3D7_0310400	parasite-infected erythrocyte surface protein (PIESP1)	1294	0	0	0	0	43																	-3.40429
PF3D7_1466900	rhoptry protein, putative	1416	0	0	0	0	43																	-3.49439
PF3D7_0507800	conserved Plasmodium protein, unknown function	1527	0	0	0	0	43																	-3.56986
PF3D7_1432300	conserved Plasmodium protein, unknown function	1639	0	0	0	0	43																	-3.64064
PF3D7_1333000	20 kDa chaperonin (CPN20)	258	0	0	0	0	42																	-1.81529
PF3D7_1212800	iron-sulfur subunit of succinate dehydrogenase	321	0	0	0	0	42																	-2.03377
PF3D7_1217900	conserved protein, unknown function	483	0	0	0	0	42																	-2.44235
PF3D7_0305200	conserved Plasmodium protein, unknown function	1139	0	0	0	0	42																	-3.30024
PF3D7_0802600	adenylyl cyclase beta (ACbeta)	2279	0	0	0	0	42																	-3.99382
PF3D7_1249800	conserved Plasmodium protein, unknown function	2831	0	0	0	0	42																	-4.21072
PF3D7_1117300	conserved Plasmodium protein, unknown function	128	0	0	0	0	41																	-1.13846
PF3D7_0304500	1-cys-glutaredoxin-like protein-1 (GLP1)	171	0	0	0	0	41																	-1.42809
PF3D7_0410600	conserved Plasmodium protein, unknown function	326	0	0	0	0	41																	-2.07333
PF3D7_1242000	conserved Plasmodium protein, unknown function	531	0	0	0	0	41																	-2.56119
PF3D7_1355500	serine/threonine protein phosphatase (PP5)	658	0	0	0	0	41																	-2.77563
PF3D7_0613700	syntaxin binding protein, putative	703	0	0	0	0	41																	-2.84178
PF3D7_0916000	sugar transporter, putative	1379	0	0	0	0	41																	-3.51554
PF3D7_1406200	conserved Plasmodium protein, unknown function	2820	0	0	0	0	41																	-4.23092
PF3D7_0909800	small nuclear ribonucleoprotein Sm D3, putative (SNRPD3)	116	0	0	0	0	40																	-1.06471
PF3D7_1026900	biotin--acetyl-CoA-carboxylase, putative	294	0	0	0	0	40																	-1.9947
PF3D7_0617000	mitochondrial import receptor subunit tom40, putative (TOM40)	377	0	0	0	0	40																	-2.24337
PF3D7_1420900	mannose-1-phosphate guanyltransferase, putative	408	0	0	0	0	40																	-2.32239
PF3D7_1306200	conserved Plasmodium protein, unknown function	478	0	0	0	0	40																	-2.48073
PF3D7_1340600	RNA lariat debranching enzyme, putative (DBR1)	575	0	0	0	0	40																	-2.66549
PF3D7_0405200	ag-1 blood stage membrane protein homologue (PfMAg-1)	579	0	0	0	0	40																	-2.67242
PF3D7_1336900	tryptophan--tRNA ligase, putative	632	0	0	0	0	40																	-2.76001
PF3D7_1343700	kelch protein, putative	726	0	0	0	0	40																	-2.89867
PF3D7_1339900	ABC transporter (MDR family), putative (MDR5)	925	0	0	0	0	40																	-3.14091
PF3D7_0629800	cullin-like protein, putative	1129	0	0	0	0	40																	-3.34021
PF3D7_0409600	replication protein A1, large subunit (RPA1)	1145	0	0	0	0	40																	-3.35428
PF3D7_0904100	adapter-related protein, putative	1388	0	0	0	0	40																	-3.54674
PF3D7_1213600	dynein light chain 1, putative (DLC8)	93	0	0	0	0	39																	-0.869038
PF3D7_1010300	succinate dehydrogenase subunit 4, putative (SDH4)	118	0	0	0	0	39																	-1.10712
PF3D7_1407500	tRNA m2G10 methyltransferase subunit, putative	125	0	0	0	0	39																	-1.16475
PF3D7_1127100	deoxyuridine 5triphosphate nucleotidohydrolase (dUTPase)	173	0	0	0	0	39																	-1.48973
PF3D7_0815600	eukaryotic translation initiation factor, putative	268	0	0	0	0	39																	-1.92743
PF3D7_0605700	conserved Plasmodium protein, unknown function	284	0	0	0	0	39																	-1.98541
PF3D7_0306500	conserved Plasmodium protein, unknown function	299	0	0	0	0	39																	-2.03688
PF3D7_1128400	geranylgeranyl pyrophosphate synthase, putative (GGPPS)	376	0	0	0	0	39																	-2.26603
PF3D7_1123400	translation elongation factor EF-1, subunit alpha, putative	555	0	0	0	0	39																	-2.65541
PF3D7_1213500	integral membrane protein GPR180, putative	698	0	0	0	0	39																	-2.88466
PF3D7_1234600	conserved Plasmodium protein, unknown function	1130	0	0	0	0	39																	-3.36641
PF3D7_1130100	60S ribosomal protein L38e, putative	87	0	0	0	0	38																	-0.828322
PF3D7_1203900	ubiquitin conjugating enzyme E2 (UBC)	147	0	0	0	0	38																	-1.35285
PF3D7_1410000	tetratricopeptide repeat family protein, putative	292	0	0	0	0	38																	-2.03917
PF3D7_1113700	glyoxalase I (GloI)	356	0	0	0	0	38																	-2.23734
PF3D7_0209400	conserved protein, unknown function	450	0	0	0	0	38																	-2.47166
PF3D7_1013400	conserved Plasmodium protein, unknown function	797	0	0	0	0	38																	-3.04327
PF3D7_0305300	conserved Plasmodium membrane protein, unknown function	956	0	0	0	0	38																	-3.22517
PF3D7_1450400	zinc finger protein, putative	1844	0	0	0	0	38																	-3.88211
PF3D7_0210100.1	60S ribosomal protein L37ae, putative	96	0	0	0	0	37																	-0.95343
PF3D7_0625700	conserved Plasmodium protein, unknown function	98	0	0	0	0	37																	-0.97405
PF3D7_1018500	PHF5-like protein, putative	111	0	0	0	0	37																	-1.09861
PF3D7_1143400	translation initiation factor eIF-1A, putative	155	0	0	0	0	37																	-1.43251
PF3D7_1454500	nifU protein, putative	162	0	0	0	0	37																	-1.47668
PF3D7_0808400	coatomer epsilon subunit, putative	278	0	0	0	0	37																	-2.0167
PF3D7_1455000	protein phosphatase, putative	410	0	0	0	0	37																	-2.40524
PF3D7_0526200.1,PF3D7_0526200.2	ADP-ribosylation factor GTPase-activating protein, putative;ADP-ribosylation factor GTPase-activating protein, putative	506	0	0	0	0	37																	-2.61562
PF3D7_0408500	flap endonuclease 1 (FEN1)	672	0	0	0	0	37																	-2.89934
PF3D7_1245100	kinesin-13, putative (KLP8)	1326	0	0	0	0	37																	-3.579
PF3D7_0213700	conserved protein, unknown function	154	0	0	0	0	36																	-1.45343
PF3D7_1430900	cytochrome c oxidase subunit 2, putative	172	0	0	0	0	36																	-1.56398
PF3D7_0816400	conserved Plasmodium protein, unknown function	233	0	0	0	0	36																	-1.86752
PF3D7_1357900	pyrroline carboxylate reductase	262	0	0	0	0	36																	-1.98483
PF3D7_1226600	proliferating cell nuclear antigen 2 (PCNA2)	264	0	0	0	0	36																	-1.99243
PF3D7_0110700	chromatin assembly factor 1 protein WD40 domain, putative	446	0	0	0	0	36																	-2.5168
PF3D7_1134800	coatomer delta subunit, putative	487	0	0	0	0	36																	-2.60475
PF3D7_0813500	conserved Plasmodium protein, unknown function	515	0	0	0	0	36																	-2.66065
PF3D7_0404800	conserved Plasmodium protein, unknown function	567	0	0	0	0	36																	-2.75684
PF3D7_0319200	endonuclease/exonuclease/phosphatase family protein, putative	906	0	0	0	0	36																	-3.22552
PF3D7_0606600	conserved Plasmodium protein, unknown function	2414	0	0	0	0	36																	-4.20552
PF3D7_0305500	conserved Plasmodium protein, unknown function	3933	0	0	0	0	36																	-4.69364
PF3D7_1243300	conserved Plasmodium protein, unknown function	79	0	0	0	0	35																	-0.8141
PF3D7_1308300	40S ribosomal protein S27, putative	82	0	0	0	0	35																	-0.851371
PF3D7_0614500	60S ribosomal protein L19, putative	182	0	0	0	0	35																	-1.64866
PF3D7_1362000	conserved Plasmodium protein, unknown function	199	0	0	0	0	35																	-1.73796
PF3D7_1441800	vacuolar-sorting protein SNF7, putative	229	0	0	0	0	35																	-1.87837
PF3D7_1332000	syntaxin, Qa-SNARE family (SYN5)	281	0	0	0	0	35																	-2.08301
PF3D7_1407100	fibrillarin, putative (NOP1)	318	0	0	0	0	35																	-2.2067
PF3D7_1034000	Sec1 family protein, putative	663	0	0	0	0	35																	-2.94143
PF3D7_1225700	conserved Plasmodium protein, unknown function	1501	0	0	0	0	35																	-3.75854
PF3D7_1472200	histone deacetylase, putative	2251	0	0	0	0	35																	-4.16378
PF3D7_0312800	60S ribosomal protein L26, putative	126	0	0	0	0	34																	-1.30992
PF3D7_1002400.1,PF3D7_1002400.2	RNA binding protein, putative;RNA binding protein, putative	248	0	0	0	0	34																	-1.98707
PF3D7_1250300	Hbeta58/Vps26 protein homolog, putative	297	0	0	0	0	34																	-2.16737
PF3D7_0312300	26S proteasome regulatory subunit S14, putative	304	0	0	0	0	34																	-2.19067
PF3D7_0918300	eukaryotic translation initiation factor 3 subunit 5, putative	320	0	0	0	0	34																	-2.24196
PF3D7_0213100	heat shock protein 40, putative	328	0	0	0	0	34																	-2.26665
PF3D7_1345600	inner membrane complex protein	370	0	0	0	0	34																	-2.38714
PF3D7_1409300	DNA damage-inducible protein 1, putative (DDI1)	382	0	0	0	0	34																	-2.41906
PF3D7_1227700	conserved Plasmodium protein, unknown function	771	0	0	0	0	34																	-3.12133
PF3D7_0610200	conserved Plasmodium protein, unknown function	960	0	0	0	0	34																	-3.34057
PF3D7_0610900	trancription factor, putative	1280	0	0	0	0	34																	-3.62825
PF3D7_0317700	CPSF (cleavage and polyadenylation specific factor), subunit A, putative	2870	0	0	0	0	34																	-4.43571
PF3D7_0903900	60S ribosomal protein L32, putative	131	0	0	0	0	33																	-1.37869
PF3D7_0107400	conserved Plasmodium protein, unknown function	153	0	0	0	0	33																	-1.53393
PF3D7_1406700	phosphatase, putative	194	0	0	0	0	33																	-1.77135
PF3D7_0104500	conserved protein, unknown function	277	0	0	0	0	33																	-2.12751
PF3D7_1206000	shewanella-like protein phosphatase 2, putative (SHLP2)	304	0	0	0	0	33																	-2.22052
PF3D7_1322400	conserved Plasmodium protein, unknown function	370	0	0	0	0	33																	-2.417
PF3D7_1471500	conserved Plasmodium membrane protein, unknown function	443	0	0	0	0	33																	-2.59706
PF3D7_0528200	eukaryotic translation initiation factor 3, subunit 6, putative	517	0	0	0	0	33																	-2.75154
PF3D7_1366600	signal recognition particle receptor alpha subunit (SRPR-alpha)	576	0	0	0	0	33																	-2.8596
PF3D7_0507600	cell differentiation protein, putative (CAF40)	652	0	0	0	0	33																	-2.98354
PF3D7_1308900	mRNA-decapping enzyme 2, putative (DCP2)	1173	0	0	0	0	33																	-3.57081
PF3D7_1032100	mRNA-decapping enzyme subunit 1, putative (DCP1)	1190	0	0	0	0	33																	-3.5852
PF3D7_1144000	40S ribosomal protein S21e, putative	82	0	0	0	0	32																	-0.940983
PF3D7_1003100	conserved Plasmodium protein, unknown function	94	0	0	0	0	32																	-1.07756
PF3D7_1339400	conserved Plasmodium protein, unknown function	148	0	0	0	0	32																	-1.53148
PF3D7_1220900	heterochromatin protein 1 (HP1)	266	0	0	0	0	32																	-2.11776
PF3D7_0626100	oxidoreductase, short-chain dehydrogenase family, putative	383	0	0	0	0	32																	-2.4823
PF3D7_1236100	clustered-asparagine-rich protein	445	0	0	0	0	32																	-2.63234
PF3D7_0417100	mRNA-binding protein PUF2 (PUF2)	514	0	0	0	0	32																	-2.77649
PF3D7_0905400	high molecular weight rhoptry protein 3 (RhopH3)	897	0	0	0	0	32																	-3.33332
PF3D7_1213900	conserved Plasmodium protein, unknown function	1137	0	0	0	0	32																	-3.57041
PF3D7_0602100	ATP-dependent RNA helicase, putative	1350	0	0	0	0	32																	-3.74212
PF3D7_0909900	helicase with Zn-finger motif, putative	1373	0	0	0	0	32																	-3.75902
PF3D7_1344300	conserved protein, unknown function	1426	0	0	0	0	32																	-3.79689
PF3D7_1209300	zinc finger transcription factor, putative (KROX1)	1461	0	0	0	0	32																	-3.82114
PF3D7_1223400	phospholipid-transporting ATPase, putative	1618	0	0	0	0	32																	-3.92321
PF3D7_0815800	vacuolar sorting protein VPS9, putative	1833	0	0	0	0	32																	-4.04797
PF3D7_1438400	metacaspase-like protein (MCA2)	2020	0	0	0	0	32																	-4.14512
PF3D7_1019900	autophagy-related protein 8 (ATG8)	124	0	0	0	0	31																	-1.38629
PF3D7_1024300	conserved Plasmodium protein, unknown function	130	0	0	0	0	31																	-1.43355
PF3D7_0725200	mago nashi protein homolog, putative	148	0	0	0	0	31																	-1.56323
PF3D7_1324700	SNARE protein, putative (YKT6.2)	221	0	0	0	0	31																	-1.96418
PF3D7_1465000	conserved Plasmodium protein, unknown function	278	0	0	0	0	31																	-2.19363
PF3D7_0204500	aspartate aminotransferase,aspartate transaminase (AspAT)	405	0	0	0	0	31																	-2.5699
PF3D7_1206100	IMP-specific 5nucleotidase, putative,haloacid dehalogenase hydrolase, putative	444	0	0	0	0	31																	-2.66184
PF3D7_1013800	conserved Plasmodium protein, unknown function	486	0	0	0	0	31																	-2.75222
PF3D7_1025100	glucosamine-fructose-6-phosphate aminotransferase, putative	829	0	0	0	0	31																	-3.28623
PF3D7_0704400	phosphoinositide-binding protein, putative	1010	0	0	0	0	31																	-3.48372
PF3D7_0609700	conserved Plasmodium protein, unknown function	1901	0	0	0	0	31																	-4.11615
PF3D7_0707200	conserved Plasmodium protein, unknown function	2129	0	0	0	0	31																	-4.22942
PF3D7_1369400	conserved Plasmodium protein, unknown function	2868	0	0	0	0	31																	-4.52738
PF3D7_0802900	conserved Plasmodium protein, unknown function	135	0	0	0	0	30																	-1.50408
PF3D7_0913400	conserved Plasmodium protein, unknown function	168	0	0	0	0	30																	-1.72277
PF3D7_0904700	bacterial histone-like protein (HU)	189	0	0	0	0	30																	-1.84055
PF3D7_1212000	glutathione peroxidase (Trx-G1)	205	0	0	0	0	30																	-1.92181
PF3D7_1351800.1,PF3D7_1351800.2	conserved Plasmodium protein, unknown function;conserved Plasmodium protein, unknown function	230	0	0	0	0	30																	-2.03688
PF3D7_0934500	vacuolar ATP synthase subunit e, putative	235	0	0	0	0	30																	-2.05839
PF3D7_1012200	conserved Plasmodium protein, unknown function	267	0	0	0	0	30																	-2.18605
PF3D7_0905000	conserved Plasmodium protein, unknown function	281	0	0	0	0	30																	-2.23716
PF3D7_0912500	conserved Plasmodium protein, unknown function	288	0	0	0	0	30																	-2.26176
PF3D7_1328300	conserved Plasmodium protein, unknown function	332	0	0	0	0	30																	-2.40394
PF3D7_0924300	thiamine pyrophosphokinase (TPK)	400	0	0	0	0	30																	-2.59027
PF3D7_1469500	conserved Plasmodium protein, unknown function	687	0	0	0	0	30																	-3.13114
PF3D7_0219600	replication factor C subunit 1, putative	904	0	0	0	0	30																	-3.40563
PF3D7_1036900	conserved Plasmodium protein, unknown function	1681	0	0	0	0	30																	-4.02595
PF3D7_0217600	conserved Plasmodium protein, unknown function	1710	0	0	0	0	30																	-4.04305
PF3D7_1358000	patatin-like phospholipase, putative	2012	0	0	0	0	30																	-4.20569
PF3D7_0505100	conserved Plasmodium protein, unknown function	2754	0	0	0	0	30																	-4.51961
PF3D7_0704000	conserved Plasmodium membrane protein, unknown function	3268	0	0	0	0	30																	-4.69074
PF3D7_0606900	glutaredoxin-like protein (GLP2)	219	0	0	0	0	29																	-2.02178
PF3D7_0813800	GDP-mannose 4,6-dehydratase, putative	357	0	0	0	0	29																	-2.51044
PF3D7_0630400	conserved Plasmodium protein, unknown function	389	0	0	0	0	29																	-2.59628
PF3D7_1142700	conserved protein, unknown function	615	0	0	0	0	29																	-3.05433
PF3D7_0629100	nicotinate phosphoribosyltransferase, putative	665	0	0	0	0	29																	-3.13249
PF3D7_1464900	ATP-dependent protease la, putative	706	0	0	0	0	29																	-3.19232
PF3D7_1369000	glycosylphosphatidylinositol anchor attachment 1 protein, putative	795	0	0	0	0	29																	-3.31105
PF3D7_0611400	SWI/SNF-related matrix-associated actin-dependent regulator of chromatin	830	0	0	0	0	29																	-3.35413
PF3D7_1225200	conserved Plasmodium protein, unknown function	1187	0	0	0	0	29																	-3.71189
PF3D7_0617100	alpha adaptin-like protein, putative	1236	0	0	0	0	29																	-3.75234
PF3D7_0714200	conserved Plasmodium protein, unknown function	1361	0	0	0	0	29																	-3.84868
PF3D7_1219000	formin 2	2974	0	0	0	0	29																	-4.63037
PF3D7_1433400	conserved Plasmodium membrane protein, unknown function	5757	0	0	0	0	29																	-5.29088
PF3D7_1312500	unspecified product	65	0	0	0	0	28																	-0.842183
PF3D7_1202900	high mobility group protein B1 (HMGB1)	97	0	0	0	0	28																	-1.24251
PF3D7_0928000.1	cytochrome c oxidase subunit 6B, putative (COX6B)	103	0	0	0	0	28																	-1.30252
PF3D7_1209200	U6 snRNA-associated Sm-like protein LSm7, putative (LSM7)	108	0	0	0	0	28																	-1.34993
PF3D7_1243600	translation initiation factor SUI1, putative	115	0	0	0	0	28																	-1.41273
PF3D7_1107000	U6 snRNA-associated Sm-like protein LSm4, putative (LSM4)	126	0	0	0	0	28																	-1.50408
PF3D7_0505900	conserved Plasmodium protein, unknown function	126	0	0	0	0	28																	-1.50408
PF3D7_0105300	cyclase-associated protein, putative (CAP)	162	0	0	0	0	28																	-1.75539
PF3D7_0812600	ubiquitin conjugating enzyme, putative	163	0	0	0	0	28																	-1.76155
PF3D7_1417700	conserved Plasmodium protein, unknown function	231	0	0	0	0	28																	-2.11021
PF3D7_1239600	hydroxyethylthiazole kinase, putative	302	0	0	0	0	28																	-2.37822
PF3D7_1308500	conserved Plasmodium protein, unknown function	359	0	0	0	0	28																	-2.55112
PF3D7_1417500	pseudouridine synthase, putative	466	0	0	0	0	28																	-2.81198
PF3D7_0920800	inosine-5monophosphate dehydrogenase	510	0	0	0	0	28																	-2.90221
PF3D7_1322600	conserved Plasmodium protein, unknown function	512	0	0	0	0	28																	-2.90612
PF3D7_1350900	transcription factor with AP2 domain(s) (ApiAP2)	521	0	0	0	0	28																	-2.92355
PF3D7_1218600	arginine--tRNA ligase, putative	590	0	0	0	0	28																	-3.04792
PF3D7_1456700	conserved Plasmodium protein, unknown function	684	0	0	0	0	28																	-3.19575
PF3D7_0914900	BSD domain, putative	709	0	0	0	0	28																	-3.23165
PF3D7_0623100	coronin binding protein, putative	786	0	0	0	0	28																	-3.33475
PF3D7_1437200	ribonucleoside-diphosphate reductase, large subunit, putative	847	0	0	0	0	28																	-3.4095
PF3D7_1218200	conserved Plasmodium protein, unknown function	2134	0	0	0	0	28																	-4.33355
PF3D7_1125900	conserved Plasmodium protein, unknown function	93	0	0	0	0	27																	-1.23676
PF3D7_1215300	10 kDa chaperonin (CPN10)	103	0	0	0	0	27																	-1.33889
PF3D7_0825400	conserved Plasmodium protein, unknown function	119	0	0	0	0	27																	-1.48329
PF3D7_0512000	prefoldin subunit, putative	119	0	0	0	0	27																	-1.48329
PF3D7_1125500	small nuclear ribonucleoprotein D1, putative (SNRPD1)	126	0	0	0	0	27																	-1.54045
PF3D7_0934300	conserved Plasmodium protein, unknown function	145	0	0	0	0	27																	-1.6809
PF3D7_0519700	conserved Plasmodium protein, unknown function	192	0	0	0	0	27																	-1.96166
PF3D7_1409200.1,PF3D7_1409200.2	conserved Plasmodium protein, unknown function;conserved Plasmodium protein, unknown function	198	0	0	0	0	27																	-1.99243
PF3D7_0415500	nuclear cap-binding protein, putative	234	0	0	0	0	27																	-2.15948
PF3D7_0829200	prohibitin, putative	272	0	0	0	0	27																	-2.30997
PF3D7_0204200	conserved Plasmodium protein, unknown function	276	0	0	0	0	27																	-2.32456
PF3D7_1247400	FK506-binding protein (FKBP)-type peptidyl-prolyl isomerase (FKBP35)	304	0	0	0	0	27																	-2.42119
PF3D7_1469200	shewanella-like protein phosphatase 1, putative (SHLP1)	358	0	0	0	0	27																	-2.5847
PF3D7_0524400	cytosolic preribosomal GTP-binding protein, putative	365	0	0	0	0	27																	-2.60406
PF3D7_0925200	rRNA processing and telomere maintaining methyltransferase, putative	413	0	0	0	0	27																	-2.72761
PF3D7_1315400	zinc finger (CCCH type) protein, putative	419	0	0	0	0	27																	-2.74203
PF3D7_1306900	U1 small nuclear ribonucleoprotein a, putative	449	0	0	0	0	27																	-2.81119
PF3D7_1131100	serpentine receptor, putative (SR1)	773	0	0	0	0	27																	-3.35444
PF3D7_1451000	conserved Plasmodium protein, unknown function	804	0	0	0	0	27																	-3.39376
PF3D7_1420200	tetratricopeptide repeat family protein, putative	1245	0	0	0	0	27																	-3.83105
PF3D7_1012700	protein phosphatase, putative	1438	0	0	0	0	27																	-3.97517
PF3D7_0319100	ubiquitin-protein ligase, putative	107	0	0	0	0	26																	-1.41473
PF3D7_1138100	ubiquitin related modifier homologue	126	0	0	0	0	26																	-1.57819
PF3D7_0804800	peptidyl-prolyl cis-trans isomerase (CYP24)	217	0	0	0	0	26																	-2.1218
PF3D7_1460400	ubiquitin carboxyl-terminal hydrolase isozyme L3 (UCHL3)	232	0	0	0	0	26																	-2.18864
PF3D7_1238400	conserved Plasmodium protein, unknown function	232	0	0	0	0	26																	-2.18864
PF3D7_1014000	GDP-fucose synthase, putative	344	0	0	0	0	26																	-2.58255
PF3D7_0306200	activator of Hsp90 ATPase (AHA1)	349	0	0	0	0	26																	-2.59698
PF3D7_1114800	glycerol-3-phosphate dehydrogenase, putative	394	0	0	0	0	26																	-2.71825
PF3D7_1419700	conserved Plasmodium protein, unknown function	509	0	0	0	0	26																	-2.97435
PF3D7_0922600	glutamine synthetase, putative	543	0	0	0	0	26																	-3.03901
PF3D7_0813000	conserved Plasmodium protein, unknown function	599	0	0	0	0	26																	-3.13717
PF3D7_1314100	conserved Plasmodium protein, unknown function	752	0	0	0	0	26																	-3.36464
PF3D7_0308900	splicing factor 3B subunit 1, putative (SF3B1)	1386	0	0	0	0	26																	-3.97608
PF3D7_0508700	Pre-mRNA-processing ATP-dependent RNA helicase prp5, putative (PRP5)	1490	0	0	0	0	26																	-4.04843
PF3D7_0513200	conserved Plasmodium protein, unknown function	2763	0	0	0	0	26																	-4.66598
PF3D7_0217800	40S ribosomal protein S26e, putative	107	0	0	0	0	25																	-1.45395
PF3D7_0904500	prefoldin subunit, putative	129	0	0	0	0	25																	-1.64094
PF3D7_0710600	60S ribosomal protein L34a, putative	150	0	0	0	0	25																	-1.79176
PF3D7_0320700	signal peptidase complex subunit 2, putative (SPC2)	179	0	0	0	0	25																	-1.96851
PF3D7_1139900	conserved protein, unknown function	198	0	0	0	0	25																	-2.06939
PF3D7_0926900	replication termination factor, putative	225	0	0	0	0	25																	-2.19722
PF3D7_1459800	bax inhibitor 1, putative	243	0	0	0	0	25																	-2.27419
PF3D7_0623500	superoxide dismutase (SOD2)	266	0	0	0	0	25																	-2.36462
PF3D7_1459400	conserved Plasmodium protein, unknown function	340	0	0	0	0	25																	-2.61007
PF3D7_0206700	adenylosuccinate lyase (ASL)	471	0	0	0	0	25																	-2.93598
PF3D7_0923800.1,PF3D7_0923800.2	thioredoxin reductase (TRXR);thioredoxin reductase (TRXR)	617	0	0	0	0	25																	-3.20599
PF3D7_1468400	zinc finger protein, putative (D13)	862	0	0	0	0	25																	-3.54038
PF3D7_0707700	ubiquitin-protein ligase e3, putative	961	0	0	0	0	25																	-3.6491
PF3D7_1210600	conserved Plasmodium protein, unknown function	1065	0	0	0	0	25																	-3.75185
PF3D7_1230200	vacuolar transporter chaperone, putative, pseudogene	1115	0	0	0	0	25																	-3.79773
PF3D7_1364200	conserved Plasmodium protein, unknown function	1813	0	0	0	0	25																	-4.28386
PF3D7_0204100	conserved Plasmodium protein, unknown function	2295	0	0	0	0	25																	-4.51961
PF3D7_1313800	conserved Plasmodium membrane protein, unknown function	3411	0	0	0	0	25																	-4.91588
PF3D7_0821800	secretory complex protein 61 beta subunit (Sec61-beta)	80	0	0	0	0	24																	-1.20397
PF3D7_1109900	apicoplast ribosomal protein L36e precursor, putative	112	0	0	0	0	24																	-1.54045
PF3D7_0620100	conserved Plasmodium protein, unknown function	130	0	0	0	0	24																	-1.68948
PF3D7_1310000	mitochondrial ATP synthase delta subunit, putative (OSCP)	253	0	0	0	0	24																	-2.35534
PF3D7_0503300	Ser/Arg-rich splicing factor, putative	308	0	0	0	0	24																	-2.55205
PF3D7_1428800.1,PF3D7_1428800.2	transcription initiation TFIID-like, putative;transcription initiation TFIID-like, putative	367	0	0	0	0	24																	-2.72731
PF3D7_0308600	pre-mRNA-processing factor 19, putative (PRPF19)	532	0	0	0	0	24																	-3.09859
PF3D7_0512200	glutathione synthetase (GS)	655	0	0	0	0	24																	-3.30658
PF3D7_1451200	conserved Plasmodium protein, unknown function	1504	0	0	0	0	24																	-4.13783
PF3D7_1235300	CCR4-NOT transcription complex subunit 4, putative (NOT4)	1662	0	0	0	0	24																	-4.23772
PF3D7_1142300	conserved Plasmodium membrane protein, unknown function	1828	0	0	0	0	24																	-4.33292
PF3D7_0321100	conserved Plasmodium protein, unknown function	1844	0	0	0	0	24																	-4.34164
PF3D7_1452600	conserved Plasmodium protein, unknown function	3347	0	0	0	0	24																	-4.93777
PF3D7_1140100	vacuolar ATP synthase subunit f, putative	128	0	0	0	0	23																	-1.71654
PF3D7_0306900	40S ribosomal protein S23, putative	145	0	0	0	0	23																	-1.84124
PF3D7_1402500	40S ribosomal protein S31/UBI, putative	149	0	0	0	0	23																	-1.86845
PF3D7_0930900	NifU-like protein, putative	192	0	0	0	0	23																	-2.122
PF3D7_1219900	D-ribulose-5-phosphate 3-epimerase, putative	227	0	0	0	0	23																	-2.28946
PF3D7_1238100	calcyclin binding protein, putative	228	0	0	0	0	23																	-2.29385
PF3D7_0921900	conserved Plasmodium protein, unknown function	248	0	0	0	0	23																	-2.37793
PF3D7_1360200	conserved protein, unknown function	257	0	0	0	0	23																	-2.41358
PF3D7_1032800	leucine-rich repeat protein (LRR1)	309	0	0	0	0	23																	-2.59785
PF3D7_0520500	phosphomethylpyrimidine kinase, putative	310	0	0	0	0	23																	-2.60108
PF3D7_1202100.1,PF3D7_1202100.2	conserved protein, unknown function;conserved protein, unknown function	401	0	0	0	0	23																	-2.85847
PF3D7_1457500	vacuolar protein sorting-associated protein 4 (VPS4)	419	0	0	0	0	23																	-2.90238
PF3D7_1137400	UVB-resistance protein UVR8 homologue	425	0	0	0	0	23																	-2.91659
PF3D7_1008800	nucleolar protein 5, putative (NOP5)	469	0	0	0	0	23																	-3.01511
PF3D7_0530200	phosphoenolpyruvate/phosphate translocator (PPT)	524	0	0	0	0	23																	-3.126
PF3D7_1319300	N2,N2-dimethylguanosine tRNA methyltransferase, putative	804	0	0	0	0	23																	-3.55411
PF3D7_0823300	histone acetyltransferase GCN5 (GCN5)	1465	0	0	0	0	23																	-4.15412
PF3D7_0811300	CCR4-associated factor 1 (CAF1)	1774	0	0	0	0	23																	-4.3455
PF3D7_1128000.1,PF3D7_1128000.2	conserved Plasmodium protein, unknown function;conserved Plasmodium protein, unknown function	1789	0	0	0	0	23																	-4.35392
PF3D7_1211600	lysine-specific histone demethylase 1, putative (LSD1)	2961	0	0	0	0	23																	-4.85779
PF3D7_0705700	40S ribosomal protein S29, putative	54	0	0	0	0	22																	-0.897942
PF3D7_1360000	conserved Plasmodium protein, unknown function	177	0	0	0	0	22																	-2.08511
PF3D7_1402200	conserved Plasmodium protein, unknown function	188	0	0	0	0	22																	-2.1454
PF3D7_0320100	SNARE protein (SEC22)	221	0	0	0	0	22																	-2.30712
PF3D7_1243500	endosome sorting protein (SNF7 homologue), putative	226	0	0	0	0	22																	-2.32949
PF3D7_0514600	ribose 5-phosphate epimerase, putative	236	0	0	0	0	22																	-2.37279
PF3D7_0729200	1-cys peroxiredoxin (AOP)	240	0	0	0	0	22																	-2.3896
PF3D7_0813600	translation initiation factor SUI1, putative	268	0	0	0	0	22																	-2.49994
PF3D7_0314000	co-chaperone p23 (P23)	275	0	0	0	0	22																	-2.52573
PF3D7_0415000	arsenical pump-driving ATPase, putative	379	0	0	0	0	22																	-2.84649
PF3D7_1306600	vacuolar ATP synthase subunit h, putative	455	0	0	0	0	22																	-3.02925
PF3D7_1022400	pre-mRNA splicing factor, putative	538	0	0	0	0	22																	-3.19682
PF3D7_1030600	glycoprotease, putative	598	0	0	0	0	22																	-3.30255
PF3D7_1328500	alpha/beta-hydrolase, putative	1004	0	0	0	0	22																	-3.8207
PF3D7_0909400	exoribonuclease, putative	1311	0	0	0	0	22																	-4.0875
PF3D7_0904900	Cu2 -transporting ATPase, putative (CUP)	2568	0	0	0	0	22																	-4.75984
PF3D7_1126900	small nuclear ribonucleoprotein F, putative (SNRPF)	86	0	0	0	0	21																	-1.40982
PF3D7_1124900	unspecified product	124	0	0	0	0	21																	-1.77576
PF3D7_1366100	conserved Plasmodium protein, unknown function	127	0	0	0	0	21																	-1.79966
PF3D7_1147700	mitochondrial ATP synthase delta subunit, putative	154	0	0	0	0	21																	-1.99243
PF3D7_0511000	translationally-controlled tumor protein homolog (TCTP)	171	0	0	0	0	21																	-2.09714
PF3D7_1034700	ADP-ribosylation factor, putative	178	0	0	0	0	21																	-2.13726
PF3D7_0418500	Bet3 transport protein, putative (BET3p)	187	0	0	0	0	21																	-2.18659
PF3D7_0906100	developmental protein, putative	195	0	0	0	0	21																	-2.22848
PF3D7_0807300	Rab GTPase 18 (RAB18)	201	0	0	0	0	21																	-2.25878
PF3D7_0317800	proteasome regulatory protein, putative	225	0	0	0	0	21																	-2.37158
PF3D7_1458400	aminotransferase, putative	316	0	0	0	0	21																	-2.71122
PF3D7_1430100	phosphotyrosyl phosphatase activator, putative	319	0	0	0	0	21																	-2.72067
PF3D7_0204900	ubiE/COQ5 methyltransferase, putative	354	0	0	0	0	21																	-2.82477
PF3D7_1361500.1	conserved Plasmodium protein, unknown function	366	0	0	0	0	21																	-2.85811
PF3D7_1312000	malonyl CoA-acyl carrier protein transacylase precursor (MCAT)	403	0	0	0	0	21																	-2.95441
PF3D7_0908000	P1 nuclease, putative	416	0	0	0	0	21																	-2.98616
PF3D7_1452200	aminomethyltransferase, putative	524	0	0	0	0	21																	-3.21697
PF3D7_1233900	sentrin-specific protease 1 (SENP1)	1026	0	0	0	0	21																	-3.8889
PF3D7_1359300	mitotic control protein dis3 homologue, putative (RRP44)	1073	0	0	0	0	21																	-3.93369
PF3D7_1421100	conserved Plasmodium protein, unknown function	1253	0	0	0	0	21																	-4.08877
PF3D7_1349300	serine/threonine protein kinase (TKL3)	1807	0	0	0	0	21																	-4.4549
PF3D7_1359700	conserved Plasmodium protein, unknown function	3698	0	0	0	0	21																	-5.17102
PF3D7_0821700	60S ribosomal protein L22, putative	139	0	0	0	0	20																	-1.93874
PF3D7_1330000.2	thioredoxin, putative	195	0	0	0	0	20																	-2.27727
PF3D7_0208800	conserved Plasmodium protein, unknown function	235	0	0	0	0	20																	-2.46385
PF3D7_0914400	conserved Plasmodium protein, unknown function	249	0	0	0	0	20																	-2.52172
PF3D7_1404900	conserved Plasmodium protein, unknown function	297	0	0	0	0	20																	-2.698
PF3D7_0111500	UMP-CMP kinase, putative	371	0	0	0	0	20																	-2.92047
PF3D7_1412800	N-myristoyltransferase (NMT)	410	0	0	0	0	20																	-3.02042
PF3D7_1140200	conserved Plasmodium protein, unknown function	447	0	0	0	0	20																	-3.10683
PF3D7_1441600	acid cluster protein 33 homologue, putative	569	0	0	0	0	20																	-3.34815
PF3D7_0410900	conserved Plasmodium protein, unknown function	977	0	0	0	0	20																	-3.88875
PF3D7_1106700	dna2/nam7 helicase family member, putative	1024	0	0	0	0	20																	-3.93574
PF3D7_1415500	conserved Plasmodium membrane protein, unknown function	1148	0	0	0	0	20																	-4.05004
PF3D7_1237900	conserved Plasmodium protein, unknown function	1188	0	0	0	0	20																	-4.08429
PF3D7_1348300	elongation factor Tu, putative	1394	0	0	0	0	20																	-4.2442
PF3D7_0626000	conserved Plasmodium protein, unknown function	1751	0	0	0	0	20																	-4.47221
PF3D7_0505000	conserved Plasmodium membrane protein, unknown function	2975	0	0	0	0	20																	-5.00227
PF3D7_1368600	mitochondrial import inner membrane translocase subunit Tim9, putative (TIM9)	92	0	0	0	0	19																	-1.57735
PF3D7_0608400	conserved Plasmodium protein, unknown function	106	0	0	0	0	19																	-1.719
PF3D7_1417900	unspecified product	144	0	0	0	0	19																	-2.02537
PF3D7_0522800	G10 protein, putative	147	0	0	0	0	19																	-2.04599
PF3D7_0415400	nonclathrin coat protein zeta2-cop-related protein, putative	208	0	0	0	0	19																	-2.3931
PF3D7_0211200	Rab GTPase 5a (RAB5a)	235	0	0	0	0	19																	-2.51515
PF3D7_0406400	cytosolic glyoxalase II (cGloII)	263	0	0	0	0	19																	-2.62772
PF3D7_1313700	septum formation protein MAF homologue, putative	264	0	0	0	0	19																	-2.63151
PF3D7_1328800	transcriptional regulatory protein sir2a (SIR2A)	273	0	0	0	0	19																	-2.66503
PF3D7_0210900	conserved Plasmodium protein, unknown function	284	0	0	0	0	19																	-2.70454
PF3D7_1315700	1-methyladenosine tRNA methyltransferase subunit, putative	316	0	0	0	0	19																	-2.8113
PF3D7_1358900	GTP binding protein, putative	367	0	0	0	0	19																	-2.96092
PF3D7_1216200	glycerol-3-phosphate dehydrogenase, putative	367	0	0	0	0	19																	-2.96092
PF3D7_1419600	conserved Plasmodium protein, unknown function	459	0	0	0	0	19																	-3.18461
PF3D7_1323500	plasmepsin V (PMV)	590	0	0	0	0	19																	-3.43568
PF3D7_1332600	apurinic/apyrimidinic endonuclease Apn1, putative (APN1)	597	0	0	0	0	19																	-3.44748
PF3D7_1471200	inorganic anion exchanger, inorganic anion antiporter (SulP)	664	0	0	0	0	19																	-3.55384
PF3D7_0524800	ubiquitin fusion degradation protein UFD1, putative	700	0	0	0	0	19																	-3.60664
PF3D7_1216900	DNA-binding chaperone, putative	939	0	0	0	0	19																	-3.90038
PF3D7_0405100	Sec24 subunit b (SEC24b)	1350	0	0	0	0	19																	-4.26342
PF3D7_0420300	transcription factor with AP2 domain(s) (ApiAP2)	3473	0	0	0	0	19																	-5.20834
PF3D7_1025600	cytochrome c oxidase copper chaperone, putative (COX17)	67	0	0	0	0	18																	-1.31432
PF3D7_0515800	BolA-like protein, putative	84	0	0	0	0	18																	-1.54045
PF3D7_0503800	60S ribosomal protein L31, putative	120	0	0	0	0	18																	-1.89712
PF3D7_0523300	conserved Plasmodium protein, unknown function	130	0	0	0	0	18																	-1.97716
PF3D7_0909300	apoptosis-related protein (ARP)	131	0	0	0	0	18																	-1.98483
PF3D7_0709500	conserved Plasmodium protein, unknown function	135	0	0	0	0	18																	-2.0149
PF3D7_0310700	sybindin-like protein, putative	145	0	0	0	0	18																	-2.08636
PF3D7_1369700	unspecified product	175	0	0	0	0	18																	-2.27441
PF3D7_0810500	protein phosphatase, putative	303	0	0	0	0	18																	-2.82336
PF3D7_1205600	conserved Plasmodium protein, unknown function	333	0	0	0	0	18																	-2.91777
PF3D7_1421800	conserved Plasmodium protein, unknown function	371	0	0	0	0	18																	-3.02583
PF3D7_0316300.1,PF3D7_0316300.2	inorganic pyrophosphatase, putative;inorganic pyrophosphatase, putative	380	0	0	0	0	18																	-3.0498
PF3D7_1408100	plasmepsin III,histo-aspartic protease (HAP)	451	0	0	0	0	18																	-3.2211
PF3D7_1129100	parasitophorous vacuolar protein 1 (PV1)	452	0	0	0	0	18																	-3.22331
PF3D7_1314700	conserved Plasmodium protein, unknown function	554	0	0	0	0	18																	-3.42679
PF3D7_1317000	U4/U6.U5 tri-snRNP-associated protein 2, putative (USP39)	640	0	0	0	0	18																	-3.5711
PF3D7_1474500	splicing factor 3A subunit 1, putative (SF3A1)	701	0	0	0	0	18																	-3.66214
PF3D7_1227100	DNA helicase 60 (DH60)	742	0	0	0	0	18																	-3.71898
PF3D7_1110100	conserved Plasmodium protein, unknown function	850	0	0	0	0	18																	-3.85486
PF3D7_1363100	conserved Plasmodium protein, unknown function	1024	0	0	0	0	18																	-4.0411
PF3D7_1007800	conserved Plasmodium protein, unknown function	1039	0	0	0	0	18																	-4.05564
PF3D7_1212900	bromodomain protein, putative	1088	0	0	0	0	18																	-4.10172
PF3D7_0418100	conserved Plasmodium protein, unknown function	1215	0	0	0	0	18																	-4.21213
PF3D7_0526500	conserved Plasmodium protein, unknown function	1384	0	0	0	0	18																	-4.34236
PF3D7_1309700	conserved Plasmodium protein, unknown function	1672	0	0	0	0	18																	-4.5314
PF3D7_0615600	conserved Plasmodium protein, unknown function	2528	0	0	0	0	18																	-4.94481
PF3D7_0105700	asparagine-rich antigen Pfa35-2	3063	0	0	0	0	18																	-5.13678
PF3D7_0729000	signal recognition particle SRP9 (SRP9)	103	0	0	0	0	17																	-1.80152
PF3D7_1442100	replication factor A protein 3, putative	109	0	0	0	0	17																	-1.85813
PF3D7_0801600	conserved Plasmodium protein, unknown function	125	0	0	0	0	17																	-1.9951
PF3D7_1213700	RNA polymerase subunit 8c, putative	145	0	0	0	0	17																	-2.14352
PF3D7_1456900	conserved protein, unknown function	147	0	0	0	0	17																	-2.15722
PF3D7_1341300	60S ribosomal protein L18-2, putative	187	0	0	0	0	17																	-2.3979
PF3D7_0314100.1	vesicle transport v-SNARE protein, putative	198	0	0	0	0	17																	-2.45505
PF3D7_1356300	ubiquitin conjugating enzyme, putative	202	0	0	0	0	17																	-2.47505
PF3D7_0722000	conserved Plasmodium protein, unknown function	245	0	0	0	0	17																	-2.66804
PF3D7_0602200	MYND finger protein, putative	252	0	0	0	0	17																	-2.69622
PF3D7_0629900	sec14-like cytosolic factor or phosphatidylinositol/phosphatidylcholine transfer protein, putative	328	0	0	0	0	17																	-2.9598
PF3D7_1244800	cytoplasmic translation machinery associated protein, putative	335	0	0	0	0	17																	-2.98092
PF3D7_1463200	replication factor C3 (RFC3)	344	0	0	0	0	17																	-3.00743
PF3D7_1425200	enoyl-CoA hydratase, putative	406	0	0	0	0	17																	-3.17314
PF3D7_1334200	chaperone binding protein, putative	524	0	0	0	0	17																	-3.42828
PF3D7_1322000	adenosine-diphosphatase, putative	565	0	0	0	0	17																	-3.50361
PF3D7_0912800	tRNA 1-methyladenosine methyltransferase subunit, putative	616	0	0	0	0	17																	-3.59003
PF3D7_0815900	lipoamide dehydrogenase (aLipDH)	666	0	0	0	0	17																	-3.66808
PF3D7_0917600	pre-mRNA-splicing factor ATP-dependent RNA helicase PRP43, putative (PRP43)	820	0	0	0	0	17																	-3.87609
PF3D7_1031600	conserved Plasmodium protein, unknown function (GEXP15)	904	0	0	0	0	17																	-3.97362
PF3D7_1033600	myb2 transcription factor, putative (Myb2)	915	0	0	0	0	17																	-3.98571
PF3D7_1307700	conserved Plasmodium protein, unknown function	1235	0	0	0	0	17																	-4.28561
PF3D7_0613500	adapter-related protein, putative	1363	0	0	0	0	17																	-4.38423
PF3D7_1335700	conserved Plasmodium protein, unknown function	1609	0	0	0	0	17																	-4.55015
PF3D7_1107900	mechanosensitive ion channel protein	1812	0	0	0	0	17																	-4.66897
PF3D7_0203000	conserved Plasmodium protein, unknown function	1979	0	0	0	0	17																	-4.75713
PF3D7_1139800	conserved Plasmodium protein, unknown function	2213	0	0	0	0	17																	-4.86889
PF3D7_1434500	dynein-related AAA-type ATPase, putative	8105	0	0	0	0	17																	-6.16702
PF3D7_1020100	unspecified product	101	0	0	0	0	16																	-1.84253
PF3D7_1421500	mitochondrial import inner membrane translocase subunit TIM8, putative (TIM8)	113	0	0	0	0	16																	-1.9548
PF3D7_0423200	BSD domain, putative	136	0	0	0	0	16																	-2.14007
PF3D7_1367000	suppressor of kinetochore protein 1, putative	162	0	0	0	0	16																	-2.31501
PF3D7_1439600	conserved Plasmodium protein, unknown function	180	0	0	0	0	16																	-2.42037
PF3D7_1012300	ubiquinol-cytochrome c reductase complex subunit, putative	192	0	0	0	0	16																	-2.48491
PF3D7_0916600	methyltransferase, putative	219	0	0	0	0	16																	-2.61648
PF3D7_0419800	60S ribosomal protein L7ae/L30e, putative	236	0	0	0	0	16																	-2.69124
PF3D7_1447700	conserved Plasmodium protein, unknown function	342	0	0	0	0	16																	-3.06222
PF3D7_1143000	alpha/beta hydrolase, putative	382	0	0	0	0	16																	-3.17283
PF3D7_0422700	eukaryotic initiation factor, putative	390	0	0	0	0	16																	-3.19356
PF3D7_1323600	conserved Plasmodium protein, unknown function	418	0	0	0	0	16																	-3.26289
PF3D7_0522600	inner membrane complex protein	483	0	0	0	0	16																	-3.40743
PF3D7_0616000	pyridoxine kinase (PdxK)	497	0	0	0	0	16																	-3.436
PF3D7_1206700	eukaryotic translation initiation factor 5, putative	565	0	0	0	0	16																	-3.56424
PF3D7_1453100	dynactin subunit 4, putative	630	0	0	0	0	16																	-3.67313
PF3D7_0707400	AAA family ATPase, putative	663	0	0	0	0	16																	-3.72419
PF3D7_0323700	U4/U6.U5 tri-snRNP-associated protein 1, putative (SART1)	693	0	0	0	0	16																	-3.76844
PF3D7_1218900	conserved Plasmodium protein, unknown function	717	0	0	0	0	16																	-3.80249
PF3D7_1248600	conserved Plasmodium protein, unknown function	746	0	0	0	0	16																	-3.84214
PF3D7_1115200	SET domain protein, putative (SET7)	793	0	0	0	0	16																	-3.90323
PF3D7_1433100	conserved Plasmodium membrane protein, unknown function	1123	0	0	0	0	16																	-4.25117
PF3D7_0207100	conserved Plasmodium protein, unknown function	1745	0	0	0	0	16																	-4.69192
PF3D7_0619000.1,PF3D7_0619000.2	conserved Plasmodium protein, unknown function;conserved Plasmodium protein, unknown function	1796	0	0	0	0	16																	-4.72073
PF3D7_0921200	conserved Plasmodium membrane protein, unknown function	2302	0	0	0	0	16																	-4.96894
PF3D7_1004200	conserved Plasmodium membrane protein, unknown function	3013	0	0	0	0	16																	-5.2381
PF3D7_0210000	secretory complex protein 61 gamma subunit (Sec61-gamma)	81	0	0	0	0	15																	-1.6864
PF3D7_1426900	ubiquinol-cytochrome c reductase hinge protein, putative	88	0	0	0	0	15																	-1.76929
PF3D7_0520300	U6 snRNA-associated sm-like protein lsm2, putative (LSM2)	103	0	0	0	0	15																	-1.92668
PF3D7_0509300	conserved Plasmodium protein, unknown function	115	0	0	0	0	15																	-2.03688
PF3D7_1216300	signal recognition particle SRP19 (SRP19)	152	0	0	0	0	15																	-2.31583
PF3D7_1118100	clathrin assembly protein AP19, putative	155	0	0	0	0	15																	-2.33537
PF3D7_0606200	ubiquitin conjugating enzyme E2, putative	155	0	0	0	0	15																	-2.33537
PF3D7_1232300	cytochrome b5, putative	157	0	0	0	0	15																	-2.3482
PF3D7_1250700	conserved Plasmodium protein, unknown function	177	0	0	0	0	15																	-2.4681
PF3D7_0812700	RNA-binding protein (U1 snRNP-like), putative	235	0	0	0	0	15																	-2.75154
PF3D7_0911800	conserved Plasmodium protein, unknown function	276	0	0	0	0	15																	-2.91235
PF3D7_0413500	phosphoglucomutase-2 (PGM2)	295	0	0	0	0	15																	-2.97893
PF3D7_0916500	apicoplast Ufd1 precursor (UFD1)	296	0	0	0	0	15																	-2.98231
PF3D7_1412900.1	non-canonical ubiquitin conjugating enzyme, putative	299	0	0	0	0	15																	-2.99239
PF3D7_0822800	U5 snrnp-specific protein, putative	324	0	0	0	0	15																	-3.07269
PF3D7_1119000	acyl-CoA-binding protein, putative	371	0	0	0	0	15																	-3.20815
PF3D7_0318100	stomatin-like protein	374	0	0	0	0	15																	-3.21621
PF3D7_0607300	uroporphyrinogen III decarboxylase (UROD)	413	0	0	0	0	15																	-3.3154
PF3D7_1368900	conserved Plasmodium protein, unknown function	450	0	0	0	0	15																	-3.4012
PF3D7_1471400	diacylglycerol kinase, putative	499	0	0	0	0	15																	-3.50456
PF3D7_1450100	signal recognition particle SRP54 (SRP54)	500	0	0	0	0	15																	-3.50656
PF3D7_0821000	conserved Plasmodium protein, unknown function	514	0	0	0	0	15																	-3.53417
PF3D7_0915000	type II NADH:ubiquinone oxidoreductase (NDH2)	533	0	0	0	0	15																	-3.57047
PF3D7_0403700	CGI-201 protein, short form	780	0	0	0	0	15																	-3.95124
PF3D7_1233000	elongation factor G (EF-G)	803	0	0	0	0	15																	-3.9803
PF3D7_0817600	conserved Plasmodium protein, unknown function	962	0	0	0	0	15																	-4.16096
PF3D7_1146600	CCAAT-box DNA binding protein subunit B (NFYB)	1301	0	0	0	0	15																	-4.46284
PF3D7_1310800	conserved Plasmodium protein, unknown function	1385	0	0	0	0	15																	-4.52541
PF3D7_1143100	transcription factor with AP2 domain(s) (AP2-O)	1604	0	0	0	0	15																	-4.67221
PF3D7_0806300	ferlin like protein, putative	1704	0	0	0	0	15																	-4.73268
PF3D7_1129300	conserved Plasmodium protein, unknown function	1846	0	0	0	0	15																	-4.81273
PF3D7_0518700	mRNA-binding protein PUF1 (PUF1)	1894	0	0	0	0	15																	-4.8384
PF3D7_0310500	DEAD box helicase, putative	2269	0	0	0	0	15																	-5.01904
PF3D7_1014600	transcriptional coactivator ADA2 (ADA2)	2578	0	0	0	0	15																	-5.14672
PF3D7_1417200	NOT family protein, putative	4466	0	0	0	0	15																	-5.6962
PF3D7_1461300	40S ribosomal protein S28e, putative	67	0	0	0	0	14																	-1.56564
PF3D7_1345300	unspecified product	84	0	0	0	0	14																	-1.79176
PF3D7_0610700	conserved Plasmodium protein, unknown function	87	0	0	0	0	14																	-1.82685
PF3D7_0819900	U6 snRNA-associated Sm-like protein LSm3, putative (LSM3)	91	0	0	0	0	14																	-1.8718
PF3D7_1037700	enhancer of rudimentary homolog, putative (ERH)	105	0	0	0	0	14																	-2.0149
PF3D7_0720500	conserved Plasmodium protein, unknown function	134	0	0	0	0	14																	-2.25878
PF3D7_1108200	D-tyrosyl-tRNA(Tyr) deacylase (DTD)	164	0	0	0	0	14																	-2.46081
PF3D7_0907500	conserved Plasmodium protein, unknown function	167	0	0	0	0	14																	-2.47894
PF3D7_0904400	signal peptidase complex subunit 3, putative (SPC3)	185	0	0	0	0	14																	-2.5813
PF3D7_1314500	cop-coated vesicle membrane protein p24 precursor, putative	206	0	0	0	0	14																	-2.68882
PF3D7_1361700	cytochrome c oxidase subunit 2, putative	228	0	0	0	0	14																	-2.79029
PF3D7_0310600.1,PF3D7_0310600.2	SAC3/GNAP family-related protein, putative;SAC3/GNAP family-related protein, putative	235	0	0	0	0	14																	-2.82053
PF3D7_1310300	zinc finger protein, putative	247	0	0	0	0	14																	-2.87033
PF3D7_0103000	vacuolar protein sorting-associated protein VTA1, putative	259	0	0	0	0	14																	-2.91777
PF3D7_1115900	DHHC-type zinc finger protein, putative	293	0	0	0	0	14																	-3.04112
PF3D7_0602300	liver merozoite formation protein, putative (PALM)	314	0	0	0	0	14																	-3.11034
PF3D7_1460100	zinc finger protein, putative	325	0	0	0	0	14																	-3.14477
PF3D7_1446400	pyruvate dehydrogenase E1 beta subunit (pdhB)	415	0	0	0	0	14																	-3.38922
PF3D7_1245800	clathrin coat assembly protein AP180, putative	431	0	0	0	0	14																	-3.42705
PF3D7_1441700	metalloprotease, putative	458	0	0	0	0	14																	-3.48781
PF3D7_1245500	conserved Plasmodium protein, unknown function	460	0	0	0	0	14																	-3.49217
PF3D7_1412600	deoxyhypusine synthase (DHS)	496	0	0	0	0	14																	-3.56752
PF3D7_0726900	mitochondrial inner membrane translocase subunit tim50, putative (TIM50)	519	0	0	0	0	14																	-3.61285
PF3D7_1124300	conserved Plasmodium protein, unknown function	525	0	0	0	0	14																	-3.62434
PF3D7_1212100	peripheral plastid protein 1, putative (PPP1)	558	0	0	0	0	14																	-3.6853
PF3D7_1347700	ethanolamine-phosphate cytidylyltransferase (ECT)	573	0	0	0	0	14																	-3.71183
PF3D7_1235500	mRNA methyltransferase, putative	646	0	0	0	0	14																	-3.83174
PF3D7_1135100	protein phosphatase, putative	689	0	0	0	0	14																	-3.89618
PF3D7_1449500	transcription factor with AP2 domain(s), putative (ApiAP2)	715	0	0	0	0	14																	-3.93323
PF3D7_0519600	zinc finger protein, putative	755	0	0	0	0	14																	-3.98766
PF3D7_1122400	conserved Plasmodium protein, unknown function	851	0	0	0	0	14																	-4.10735
PF3D7_0821100	protein kinase 1 (PK1)	918	0	0	0	0	14																	-4.18314
PF3D7_0822700	conserved Plasmodium protein, unknown function	924	0	0	0	0	14																	-4.18965
PF3D7_1209500.1,PF3D7_1209500.2	cGMP-specific phosphodiesterase (PDE1);cGMP-specific phosphodiesterase (PDE1)	954	0	0	0	0	14																	-4.22161
PF3D7_0909000	conserved Plasmodium protein, unknown function	1012	0	0	0	0	14																	-4.28063
PF3D7_0911100	conserved Plasmodium protein, unknown function	1165	0	0	0	0	14																	-4.42142
PF3D7_0723900	conserved Plasmodium protein, unknown function	1222	0	0	0	0	14																	-4.46919
PF3D7_1122800	calcium-dependent protein kinase 6 (CDPK6)	1617	0	0	0	0	14																	-4.74927
PF3D7_1119900	conserved Plasmodium protein, unknown function	1749	0	0	0	0	14																	-4.82774
PF3D7_1470100	conserved Plasmodium protein, unknown function	2454	0	0	0	0	14																	-5.16642
PF3D7_0719900	conserved Plasmodium membrane protein, unknown function	3401	0	0	0	0	14																	-5.49277
PF3D7_0203400	conserved Plasmodium protein, unknown function	91	0	0	0	0	13																	-1.94591
PF3D7_0902900	conserved Plasmodium protein, unknown function	102	0	0	0	0	13																	-2.06002
PF3D7_1203200	signal recognition particle SRP14 (SRP14)	104	0	0	0	0	13																	-2.07944
PF3D7_0711300	conserved Plasmodium protein, unknown function	119	0	0	0	0	13																	-2.21417
PF3D7_0207200	iron-sulfur assembly protein, putative	160	0	0	0	0	13																	-2.51022
PF3D7_0511700	kinase binding protein CGI-121, putative	179	0	0	0	0	13																	-2.62244
PF3D7_0915700	conserved Plasmodium protein, unknown function	189	0	0	0	0	13																	-2.6768
PF3D7_1435400	conserved protein, unknown function	190	0	0	0	0	13																	-2.68207
PF3D7_0910600	SNARE protein (YKT6.1)	199	0	0	0	0	13																	-2.72836
PF3D7_1309500	small nucleolar ribonucleoprotein, putative	209	0	0	0	0	13																	-2.77738
PF3D7_1111900	conserved Plasmodium protein, unknown function	236	0	0	0	0	13																	-2.89888
PF3D7_1125200	conserved Plasmodium protein, unknown function	238	0	0	0	0	13																	-2.90732
PF3D7_1448600	SNARE protein, putative (VTI1)	253	0	0	0	0	13																	-2.96844
PF3D7_0414900	armadillo-domain containing rhoptry protein (ARO)	275	0	0	0	0	13																	-3.05182
PF3D7_1010100	conserved Plasmodium protein, unknown function	298	0	0	0	0	13																	-3.13214
PF3D7_0414400	conserved Plasmodium protein, unknown function	330	0	0	0	0	13																	-3.23414
PF3D7_0416500	repressor of RNA polymerase III transcription MAF1, putative	389	0	0	0	0	13																	-3.39863
PF3D7_0630500	microtubule-associated protein ytm1 homologue, putative	498	0	0	0	0	13																	-3.64565
PF3D7_1437000	N-acetyltransferase, putative	544	0	0	0	0	13																	-3.734
PF3D7_0105200	conserved Plasmodium protein, unknown function	568	0	0	0	0	13																	-3.77717
PF3D7_1017300.1,PF3D7_1017300.2	golgi re-assembly stacking protein 2 (GRASP);golgi re-assembly stacking protein 2 (GRASP)	573	0	0	0	0	13																	-3.78594
PF3D7_0519800	conserved protein, unknown function	668	0	0	0	0	13																	-3.93934
PF3D7_1107200	conserved Plasmodium protein, unknown function	713	0	0	0	0	13																	-4.00453
PF3D7_0933000	mRNA processing protein, putative	761	0	0	0	0	13																	-4.06968
PF3D7_0503600	myosin B (MyoB)	801	0	0	0	0	13																	-4.12091
PF3D7_1438500	cleavage and polyadenylation specifity factor, putative	876	0	0	0	0	13																	-4.21042
PF3D7_0309300	N2227-like protein, putative	955	0	0	0	0	13																	-4.29676
PF3D7_1130500	conserved Plasmodium protein, unknown function	985	0	0	0	0	13																	-4.32769
PF3D7_0801800	mannose-6-phosphate isomerase, putative	1011	0	0	0	0	13																	-4.35375
PF3D7_1422700	conserved Plasmodium protein, unknown function	1190	0	0	0	0	13																	-4.51676
PF3D7_0929400	high molecular weight rhoptry protein 2 (RhopH2)	1378	0	0	0	0	13																	-4.66344
PF3D7_0423600	conserved Plasmodium protein, unknown function	1612	0	0	0	0	13																	-4.82028
PF3D7_1138700	conserved Plasmodium protein, unknown function	1870	0	0	0	0	13																	-4.96874
PF3D7_0110500	bromodomain protein, putative	2285	0	0	0	0	13																	-5.16917
PF3D7_0613100	conserved Plasmodium protein, unknown function	78	0	0	0	0	12																	-1.8718
PF3D7_1125600	unspecified product	83	0	0	0	0	12																	-1.93393
PF3D7_0416700	unspecified product	89	0	0	0	0	12																	-2.00373
PF3D7_1467800	conserved Plasmodium protein, unknown function	90	0	0	0	0	12																	-2.0149
PF3D7_0706400	ribosomal protein, L37e, putative	92	0	0	0	0	12																	-2.03688
PF3D7_0622600	unspecified product	96	0	0	0	0	12																	-2.07944
PF3D7_1351100	conserved Plasmodium protein, unknown function	156	0	0	0	0	12																	-2.56495
PF3D7_0106400	pre-rRNA-processing protein TSR2, putative	156	0	0	0	0	12																	-2.56495
PF3D7_0718500	prefoldin subunit 3, putative	192	0	0	0	0	12																	-2.77259
PF3D7_1317400	conserved Plasmodium protein, unknown function	205	0	0	0	0	12																	-2.8381
PF3D7_1419300	glutathione S-transferase (GST)	211	0	0	0	0	12																	-2.86695
PF3D7_1346600	conserved Plasmodium protein, unknown function	221	0	0	0	0	12																	-2.91326
PF3D7_0208700.2	conserved Plasmodium protein, unknown function	222	0	0	0	0	12																	-2.91777
PF3D7_1331600	protein tyrosine phosphatase, putative	228	0	0	0	0	12																	-2.94444
PF3D7_0708300	O-sialoglycoprotein endopeptidase, putative	229	0	0	0	0	12																	-2.94882
PF3D7_1418000	ubiquitin fusion degradation protein UFD1, putative (UFD1)	282	0	0	0	0	12																	-3.157
PF3D7_0723000	tRNAHis guanylyltransferase, putative	299	0	0	0	0	12																	-3.21554
PF3D7_1210100	syntaxin, Qa-SNARE family (SYN2)	310	0	0	0	0	12																	-3.25167
PF3D7_1023200	orotidine monophosphate decarboxylase (OMPDC)	323	0	0	0	0	12																	-3.29275
PF3D7_1206400	rhodanese like protein, putative	346	0	0	0	0	12																	-3.36153
PF3D7_1405600	ribonucleotide reductase small subunit (RNR)	349	0	0	0	0	12																	-3.37017
PF3D7_0110800	transcription initiation factor TFIIB, putative	367	0	0	0	0	12																	-3.42046
PF3D7_0910800	nucleotide binding protein, putative	447	0	0	0	0	12																	-3.61765
PF3D7_1447200	conserved Plasmodium protein, unknown function	529	0	0	0	0	12																	-3.78608
PF3D7_1458000	cysteine proteinase falcipain 1 (FP1)	569	0	0	0	0	12																	-3.85897
PF3D7_0603300	dihydroorotate dehydrogenase, mitochondrial precursor (DHODH)	569	0	0	0	0	12																	-3.85897
PF3D7_1107100	nucleic acid binding protein, putative	588	0	0	0	0	12																	-3.89182
PF3D7_0811400	conserved protein, unknown function	608	0	0	0	0	12																	-3.92527
PF3D7_0619700	conserved Plasmodium protein, unknown function	633	0	0	0	0	12																	-3.96556
PF3D7_1215900	serpentine receptor, putative (SR10)	655	0	0	0	0	12																	-3.99973
PF3D7_0109900.1	phosphatidate cytidylyltransferase, putative	761	0	0	0	0	12																	-4.14973
PF3D7_1035000	U2 snRNA/tRNA pseudouridine synthase, putative	993	0	0	0	0	12																	-4.41582
PF3D7_0914100	conserved Plasmodium protein, unknown function	1166	0	0	0	0	12																	-4.57643
PF3D7_1134500	alpha/beta hydrolase, putative	1744	0	0	0	0	12																	-4.97903
PF3D7_1359000	conserved Plasmodium protein, unknown function	3281	0	0	0	0	12																	-5.611
PF3D7_1349500	conserved Plasmodium protein, unknown function	3381	0	0	0	0	12																	-5.64102
PF3D7_0522400	conserved Plasmodium protein, unknown function	9307	0	0	0	0	12																	-6.65362
PF3D7_1237800	ubiquitin-like protein, putative	73	0	0	0	0	11																	-1.89256
PF3D7_1313000	ubiquitin-like protein nedd8 homologue, putative (Nedd8)	76	0	0	0	0	11																	-1.93284
PF3D7_0502900	mitochondrial inner membrane TIM10 associated protein, putative	82	0	0	0	0	11																	-2.00882
PF3D7_0306600	conserved Plasmodium protein, unknown function	85	0	0	0	0	11																	-2.04476
PF3D7_0810000	acyl-CoA binding protein, putative	90	0	0	0	0	11																	-2.10191
PF3D7_0805200	conserved Plasmodium protein, unknown function	93	0	0	0	0	11																	-2.1347
PF3D7_0530000	conserved Plasmodium protein, unknown function	97	0	0	0	0	11																	-2.17682
PF3D7_0219400.1	ribosome associated membrane protein RAMP4, putative	101	0	0	0	0	11																	-2.21723
PF3D7_0932000	conserved Plasmodium protein, unknown function	102	0	0	0	0	11																	-2.22708
PF3D7_1322800	conserved Plasmodium protein, unknown function	115	0	0	0	0	11																	-2.34704
PF3D7_1033300	conserved Plasmodium protein, unknown function	122	0	0	0	0	11																	-2.40613
PF3D7_0610500	conserved protein, unknown function	123	0	0	0	0	11																	-2.41429
PF3D7_1358400	conserved Plasmodium protein, unknown function	139	0	0	0	0	11																	-2.53658
PF3D7_1003300	N-acetyltransferase, putative	152	0	0	0	0	11																	-2.62599
PF3D7_1119800	alternative splicing factor ASF-1, putative (ASF1)	200	0	0	0	0	11																	-2.90042
PF3D7_1333300	transmembrane protein Tmp21 homologue, putative	211	0	0	0	0	11																	-2.95396
PF3D7_0723500	dynactin subunit 5, putative	226	0	0	0	0	11																	-3.02264
PF3D7_1017400	phosphomannomutase, putative	244	0	0	0	0	11																	-3.09927
PF3D7_0931400	conserved Plasmodium protein, unknown function	310	0	0	0	0	11																	-3.33868
PF3D7_0412200	conserved Plasmodium protein, unknown function	332	0	0	0	0	11																	-3.40724
PF3D7_0602500	geranylgeranyltransferase, putative	379	0	0	0	0	11																	-3.53964
PF3D7_0622500	RNA methyltransferase, putative	434	0	0	0	0	11																	-3.67515
PF3D7_0717900	thioredoxin-like protein	449	0	0	0	0	11																	-3.70913
PF3D7_1409000	conserved Plasmodium protein, unknown function	566	0	0	0	0	11																	-3.9407
PF3D7_0416000	RNA binding protein, putative	579	0	0	0	0	11																	-3.96341
PF3D7_1430200	plasmepsin IX	627	0	0	0	0	11																	-4.04305
PF3D7_0620500	cleavage stimulation factor subunit 1-like protein, putative	650	0	0	0	0	11																	-4.07908
PF3D7_1033500	WD-repeat protein, putative	709	0	0	0	0	11																	-4.16596
PF3D7_1475600	bromodomain protein, putative	729	0	0	0	0	11																	-4.19378
PF3D7_0820500	C-13 antigen	852	0	0	0	0	11																	-4.34969
PF3D7_0730300	transcription factor with AP2 domain(s) (AP2-L)	1331	0	0	0	0	11																	-4.79579
PF3D7_0808100	conserved Plasmodium protein, unknown function	1609	0	0	0	0	11																	-4.98547
PF3D7_1130700	structural maintenance of chromosome protein, putative	1818	0	0	0	0	11																	-5.1076
PF3D7_0705500	inositol-phosphate phosphatase, putative	2814	0	0	0	0	11																	-5.54447
PF3D7_1138400	guanylyl cyclase (GCalpha)	4226	0	0	0	0	11																	-5.95112
PF3D7_1229700	unspecified product	82	0	0	0	0	10																	-2.10413
PF3D7_0306700	membrane magnesium transporter, putative	116	0	0	0	0	10																	-2.45101
PF3D7_0205500	DNA-directed RNA polymerase II 16 kDa subunit, putative	132	0	0	0	0	10																	-2.58022
PF3D7_1332300	sedlin, putative	163	0	0	0	0	10																	-2.79117
PF3D7_1418200	conserved Plasmodium protein, unknown function	166	0	0	0	0	10																	-2.8094
PF3D7_1116300	peptidyl-prolyl cis-trans isomerase (CYP19C)	167	0	0	0	0	10																	-2.81541
PF3D7_1437800	41-2 protein antigen precursor,transport protein particle (TRAPP) component, Bet3	184	0	0	0	0	10																	-2.91235
PF3D7_0933200	calcyclin binding protein, putative	200	0	0	0	0	10																	-2.99573
PF3D7_1304300	conserved Plasmodium protein, unknown function	213	0	0	0	0	10																	-3.05871
PF3D7_0808300	ubiquitin regulatory protein, putative	238	0	0	0	0	10																	-3.16969
PF3D7_1447400	conserved Plasmodium protein, unknown function	253	0	0	0	0	10																	-3.2308
PF3D7_1224500	histone chaperone ASF1, putative (ASF1)	273	0	0	0	0	10																	-3.30689
PF3D7_1223700	integral membrane protein, putative	273	0	0	0	0	10																	-3.30689
PF3D7_1009000	diphthine synthase	274	0	0	0	0	10																	-3.31054
PF3D7_1438600	conserved protein, unknown function	277	0	0	0	0	10																	-3.32143
PF3D7_0623900	ribonuclease H2 subunit A, putative	288	0	0	0	0	10																	-3.36038
PF3D7_1413500	FeS assembly ATPase SufC (SufC)	347	0	0	0	0	10																	-3.54674
PF3D7_1314600	lipoate protein ligase a type 1 (LplA1)	408	0	0	0	0	10																	-3.70868
PF3D7_1401800	choline kinase (CK)	440	0	0	0	0	10																	-3.78419
PF3D7_1408000	plasmepsin II	453	0	0	0	0	10																	-3.81331
PF3D7_0608310	sorting assembly machinery 50 kDa subunit, putative (SAM50)	453	0	0	0	0	10																	-3.81331
PF3D7_0804900	GTPase activator, putative	491	0	0	0	0	10																	-3.89386
PF3D7_1422800	actin-related protein, putative (ARP4a)	522	0	0	0	0	10																	-3.95508
PF3D7_0104400	4-hydroxy-3-methylbut-2-enyl diphosphate reductase (LytB)	535	0	0	0	0	10																	-3.97968
PF3D7_0810300	protein phosphatase, putative	550	0	0	0	0	10																	-4.00733
PF3D7_1124500	pyruvate dehydrogenase E1 alpha subunit (pdhA)	608	0	0	0	0	10																	-4.10759
PF3D7_1338700	conserved Plasmodium protein, unknown function	622	0	0	0	0	10																	-4.13035
PF3D7_1139600	conserved Plasmodium protein, unknown function	629	0	0	0	0	10																	-4.14155
PF3D7_1129400	RNA methyltransferase, putative	634	0	0	0	0	10																	-4.14946
PF3D7_0920000	long chain fatty acid elongation enzyme, putative	642	0	0	0	0	10																	-4.162
PF3D7_0520200	conserved Plasmodium protein, unknown function	697	0	0	0	0	10																	-4.2442
PF3D7_0715600	GTP-binding translation elongation factor tu family protein, putative	754	0	0	0	0	10																	-4.32281
PF3D7_1141300	conserved Plasmodium protein, unknown function	1012	0	0	0	0	10																	-4.6171
PF3D7_0704800	conserved Plasmodium protein, unknown function	1297	0	0	0	0	10																	-4.86522
PF3D7_1320700	conserved Plasmodium protein, unknown function	1442	0	0	0	0	10																	-4.9712
PF3D7_1211200	conserved Plasmodium protein, unknown function	1831	0	0	0	0	10																	-5.21003
PF3D7_0525200	conserved Plasmodium protein, unknown function	1849	0	0	0	0	10																	-5.21982
PF3D7_0829000	conserved Plasmodium membrane protein, unknown function	1907	0	0	0	0	10																	-5.2507
PF3D7_1138800	conserved Plasmodium protein, unknown function	1920	0	0	0	0	10																	-5.2575
PF3D7_1227200	potassium channel protein (K1)	1966	0	0	0	0	10																	-5.28117
PF3D7_0709300	Cg2 protein (CG2)	2729	0	0	0	0	10																	-5.60911
PF3D7_1475400	cysteine repeat modular protein 4 (CRMP4)	5906	0	0	0	0	10																	-6.38114
PF3D7_0629700	SET domain protein, putative (SET1)	6753	0	0	0	0	10																	-6.51516
PF3D7_1325000	U6 snRNA-associated Sm-like protein LSm6, putative (LSM6)	77	0	0	0	0	9																	-2.14658
PF3D7_1355800	splicing factor 3B subunit 5, putative (SF3B5)	86	0	0	0	0	9																	-2.25712
PF3D7_0404000	conserved Plasmodium protein, unknown function	99	0	0	0	0	9																	-2.3979
PF3D7_0702900	centrin, putative	107	0	0	0	0	9																	-2.4756
PF3D7_1022900	PfMNL-3 mitoNEET-like iron-sulfur protein, putative	118	0	0	0	0	9																	-2.57346
PF3D7_1314400	conserved Plasmodium protein, unknown function	122	0	0	0	0	9																	-2.6068
PF3D7_0213200	conserved Plasmodium protein, unknown function	126	0	0	0	0	9																	-2.63906
PF3D7_0105400.2	conserved Plasmodium protein, unknown function	133	0	0	0	0	9																	-2.69312
PF3D7_1356200	mitochondrial import inner membrane translocase subunit TIM23, putative (TIM23)	167	0	0	0	0	9																	-2.92077
PF3D7_1333700	histone H3 variant (CenH3)	170	0	0	0	0	9																	-2.93857
PF3D7_1113100	protein tyrosine phosphatase (PRL)	218	0	0	0	0	9																	-3.18727
PF3D7_0927800	cytochrome c oxidase subunit 5B, putative (COX5B)	273	0	0	0	0	9																	-3.41225
PF3D7_1407200	conserved Plasmodium protein, unknown function	289	0	0	0	0	9																	-3.4692
PF3D7_1223800	mitochondrial carrier protein, putative	308	0	0	0	0	9																	-3.53288
PF3D7_0210700	syntaxin, Qa-SNARE family (SYN17)	314	0	0	0	0	9																	-3.55217
PF3D7_1146500	leucine-rich repeat protein (LRR10)	317	0	0	0	0	9																	-3.56168
PF3D7_0923000	DNA-directed RNA polymerase II, putative	335	0	0	0	0	9																	-3.61691
PF3D7_1366800	phosphatidylserine synthase I, putative	357	0	0	0	0	9																	-3.68051
PF3D7_0212900	Leu/Phe-tRNA protein transferase, putative	365	0	0	0	0	9																	-3.70267
PF3D7_0422100	transmembrane emp24 domain-containing protein, putative	385	0	0	0	0	9																	-3.75602
PF3D7_1117400	conserved Plasmodium protein, unknown function	397	0	0	0	0	9																	-3.78671
PF3D7_0107300	probable protein, unknown function	399	0	0	0	0	9																	-3.79174
PF3D7_1127500	protein disulfide isomerase, putative	424	0	0	0	0	9																	-3.85251
PF3D7_0319800	conserved Plasmodium protein, unknown function	477	0	0	0	0	9																	-3.97029
PF3D7_1115400	cysteine proteinase falcipain 3 (FP3)	492	0	0	0	0	9																	-4.00125
PF3D7_1122100	conserved Plasmodium protein, unknown function	514	0	0	0	0	9																	-4.045
PF3D7_0818100	zinc finger protein, putative	538	0	0	0	0	9																	-4.09063
PF3D7_0321600	ATP-dependent RNA helicase, putative	735	0	0	0	0	9																	-4.40265
PF3D7_1022600	kelch protein, putative	891	0	0	0	0	9																	-4.59512
PF3D7_0918900	gamma-glutamylcysteine synthetase (gammaGCS)	1063	0	0	0	0	9																	-4.77163
PF3D7_1458600	conserved Plasmodium protein, unknown function	1163	0	0	0	0	9																	-4.86153
PF3D7_0809200	asparagine-rich antigen Pfa55-14 (pfa55-14)	1316	0	0	0	0	9																	-4.98513
PF3D7_0625300	DNA polymerase 1, putative	1444	0	0	0	0	9																	-5.07795
PF3D7_1358200	conserved Plasmodium protein, unknown function	1596	0	0	0	0	9																	-5.17803
PF3D7_1116100	serine esterase, putative	1830	0	0	0	0	9																	-5.31485
PF3D7_0515300	phosphatidylinositol 3-kinase (PI3K)	2133	0	0	0	0	9																	-5.46806
PF3D7_1240600	erythrocyte membrane protein 1, PfEMP1 (VAR)	2359	0	0	0	0	9																	-5.56877
PF3D7_1123000	conserved Plasmodium protein, unknown function	2467	0	0	0	0	9																	-5.61353
PF3D7_1464500	conserved Plasmodium membrane protein, unknown function	3251	0	0	0	0	9																	-5.88949
PF3D7_1023100	dynein heavy chain, putative	5687	0	0	0	0	9																	-6.44871
PF3D7_0715500	mitochondrial ATP synthase F1, epsilon subunit, putative	71	0	0	0	0	8																	-2.18324
PF3D7_1235100	conserved Plasmodium protein, unknown function	71	0	0	0	0	8																	-2.18324
PF3D7_1208600	mitochondrial import inner membrane translocase subunit tim10, putative (TIM10)	75	0	0	0	0	8																	-2.23805
PF3D7_0111900	conserved Plasmodium protein, unknown function	81	0	0	0	0	8																	-2.31501
PF3D7_1406000	RNA binding protein, putative	107	0	0	0	0	8																	-2.59339
PF3D7_1141200	conserved Plasmodium protein, unknown function	111	0	0	0	0	8																	-2.63009
PF3D7_0706300	conserved Plasmodium protein, unknown function	118	0	0	0	0	8																	-2.69124
PF3D7_1030000	transcription factor, putative	133	0	0	0	0	8																	-2.81091
PF3D7_1208300	mitochondrial ACP precursor, putative	157	0	0	0	0	8																	-2.9768
PF3D7_0504900	conserved protein, unknown function	172	0	0	0	0	8																	-3.06805
PF3D7_0716400	conserved Plasmodium protein, unknown function	174	0	0	0	0	8																	-3.07961
PF3D7_1442000	ADP-ribosylation factor, putative	183	0	0	0	0	8																	-3.13004
PF3D7_0929900	conserved Plasmodium protein, unknown function	191	0	0	0	0	8																	-3.17283
PF3D7_1364800	DNA-directed RNA polymerase 2, putative	205	0	0	0	0	8																	-3.24357
PF3D7_1310600	secretory complex protein 61 alpha,Rab GTPase 5b (Sec61-alpha)	207	0	0	0	0	8																	-3.25328
PF3D7_0823100	RWD domain-containing protein, putative	229	0	0	0	0	8																	-3.35428
PF3D7_1332800	translation initiation factor 6, putative	247	0	0	0	0	8																	-3.42995
PF3D7_1469100	conserved Plasmodium protein, unknown function	260	0	0	0	0	8																	-3.48124
PF3D7_1007000	conserved membrane protein, unknown function	260	0	0	0	0	8																	-3.48124
PF3D7_0309800	YTH domain-containing protein, putative	280	0	0	0	0	8																	-3.55535
PF3D7_1111300	SNARE protein, putative (GS27)	289	0	0	0	0	8																	-3.58699
PF3D7_1118400	haloacid dehalogenase-like hydrolase, putative	306	0	0	0	0	8																	-3.64414
PF3D7_1144600	transcription initiation factor IIF subunit beta, putative (TFG2)	317	0	0	0	0	8																	-3.67946
PF3D7_0508300	triose phosphate transporter (TPT)	342	0	0	0	0	8																	-3.75537
PF3D7_0305000	elongation factor Ts (EF-Ts)	390	0	0	0	0	8																	-3.88671
PF3D7_0714500	transcription elongation factor s-II, putative	403	0	0	0	0	8																	-3.9195
PF3D7_0906500	arginase	411	0	0	0	0	8																	-3.93915
PF3D7_1407800	plasmepsin IV (PM4)	449	0	0	0	0	8																	-4.02758
PF3D7_0925700	histone deacetylase (HDAC1)	449	0	0	0	0	8																	-4.02758
PF3D7_1315300	conserved Plasmodium protein, unknown function	477	0	0	0	0	8																	-4.08807
PF3D7_1420000	splicing factor 3B subunit 4, putative (SF3B4)	484	0	0	0	0	8																	-4.10264
PF3D7_1240000	3-hydroxyisobutyryl-coenzyme A hydrolase, putative	541	0	0	0	0	8																	-4.21398
PF3D7_0104800	novel putative transporter 1 (NPT1)	577	0	0	0	0	8																	-4.2784
PF3D7_0906200	conserved Plasmodium protein, unknown function	578	0	0	0	0	8																	-4.28013
PF3D7_1470700	conserved Plasmodium protein, unknown function	580	0	0	0	0	8																	-4.28359
PF3D7_0924700	splicing factor 3A subunit 3, putative (SF3A3)	589	0	0	0	0	8																	-4.29898
PF3D7_1111200	conserved Plasmodium protein, unknown function	594	0	0	0	0	8																	-4.30744
PF3D7_0302000	golgi organization and biogenesis factor, putative	600	0	0	0	0	8																	-4.31749
PF3D7_0826200	alpha/beta hydrolase, putative	602	0	0	0	0	8																	-4.32082
PF3D7_1128900	conserved Plasmodium protein, unknown function	622	0	0	0	0	8																	-4.3535
PF3D7_0821600	clp1-related protein, putative	674	0	0	0	0	8																	-4.43379
PF3D7_0814400	phospholipase DDHD1, putative	679	0	0	0	0	8																	-4.44118
PF3D7_0209100	phospholipase A2, putative	679	0	0	0	0	8																	-4.44118
PF3D7_1442500	protein prenyltransferase alpha subunit, putative	724	0	0	0	0	8																	-4.50535
PF3D7_1249600	leucine-rich repeat protein (LRR12)	848	0	0	0	0	8																	-4.66344
PF3D7_1352800	vacuolar fusion protein MON1, putative	884	0	0	0	0	8																	-4.70502
PF3D7_1307900	tripartite motif protein, putative	886	0	0	0	0	8																	-4.70728
PF3D7_1337300	exoribonuclease, putative	903	0	0	0	0	8																	-4.72628
PF3D7_0907400	ATP-dependent protease ATPase subunit ClpY (ClpY)	922	0	0	0	0	8																	-4.7471
PF3D7_0506800	transcription factor 25, putative (TCF25)	929	0	0	0	0	8																	-4.75467
PF3D7_0110100	selenocysteine-specific elongation factor selB homologue, putative	934	0	0	0	0	8																	-4.76003
PF3D7_0323800	conserved Plasmodium protein, unknown function	977	0	0	0	0	8																	-4.80505
PF3D7_0724100	conserved Plasmodium protein, unknown function	1003	0	0	0	0	8																	-4.83131
PF3D7_0815300	FAD-dependent monooxygenase, putative	1182	0	0	0	0	8																	-4.99552
PF3D7_0211500	GAF domain-related protein, putative	1245	0	0	0	0	8																	-5.04745
PF3D7_1355700	protein phosphatase, putative	1288	0	0	0	0	8																	-5.0814
PF3D7_1462100	conserved Plasmodium protein, unknown function	1334	0	0	0	0	8																	-5.1165
PF3D7_0930500	diacylglycerol kinase, putative (DGK1)	1360	0	0	0	0	8																	-5.1358
PF3D7_1214100	phosphatidylinositol-glycan biosynthesis class O protein, putative	1373	0	0	0	0	8																	-5.14531
PF3D7_1450500	conserved Plasmodium protein, unknown function	1653	0	0	0	0	8																	-5.33091
PF3D7_1467900	rab GTPase activator, putative	1656	0	0	0	0	8																	-5.33272
PF3D7_1237500	conserved Plasmodium protein, unknown function	1681	0	0	0	0	8																	-5.3477
PF3D7_0627100	ankyrin-repeat protein, putative	1712	0	0	0	0	8																	-5.36598
PF3D7_1429400	rRNA (adenosine-2O-)-methyltransferase, putative	2779	0	0	0	0	8																	-5.8504
PF3D7_1448500	conserved Plasmodium protein, unknown function	3704	0	0	0	0	8																	-6.13773
PF3D7_0611700	60S ribosomal protein L39, putative	51	0	0	0	0	7																	-1.98592
PF3D7_0219200	40S ribosomal protein S30, putative	58	0	0	0	0	7																	-2.11453
PF3D7_1443300	U6 snRNA-associated Sm-like protein LSm5, putative (LSM5)	101	0	0	0	0	7																	-2.66921
PF3D7_1016900	early transcribed membrane protein 10.3 (ETRAMP10.3)	108	0	0	0	0	7																	-2.73622
PF3D7_1214400	conserved protein, unknown function	120	0	0	0	0	7																	-2.84158
PF3D7_0524500	conserved Plasmodium protein, unknown function	123	0	0	0	0	7																	-2.86627
PF3D7_1470400	mitochondrial pyruvate carrier protein 2, putative (MPC2)	129	0	0	0	0	7																	-2.9139
PF3D7_1234900	conserved Plasmodium protein, unknown function	151	0	0	0	0	7																	-3.07137
PF3D7_1345100	thioredoxin 2 (TRX2)	157	0	0	0	0	7																	-3.11034
PF3D7_0213000	conserved Plasmodium protein, unknown function	166	0	0	0	0	7																	-3.16608
PF3D7_0110900	adenylate kinase-like protein 1 (AKLP1)	186	0	0	0	0	7																	-3.27984
PF3D7_0618200	conserved Plasmodium protein, unknown function	199	0	0	0	0	7																	-3.34739
PF3D7_0109200	mRNA cleavage factor-like protein, putative	232	0	0	0	0	7																	-3.50083
PF3D7_0920100	chaperone, putative	249	0	0	0	0	7																	-3.57154
PF3D7_0513100	conserved Plasmodium protein, unknown function	251	0	0	0	0	7																	-3.57954
PF3D7_0206900.1,PF3D7_0206900.2	merozoite surface protein 5 (MSP5);merozoite surface protein 5 (MSP5)	272	0	0	0	0	7																	-3.65989
PF3D7_0609800	zinc finger protein, putative	284	0	0	0	0	7																	-3.70306
PF3D7_0517600	f-actin capping protein beta subunit, putative (CP)	292	0	0	0	0	7																	-3.73084
PF3D7_1349600	conserved Plasmodium protein, unknown function	307	0	0	0	0	7																	-3.78094
PF3D7_1241700	replication factor C subunit 4, putative	336	0	0	0	0	7																	-3.8712
PF3D7_0307400	ATP-dependent Clp protease proteolytic subunit (ClpP)	370	0	0	0	0	7																	-3.96759
PF3D7_1236900	conserved Plasmodium protein, unknown function	372	0	0	0	0	7																	-3.97298
PF3D7_1336000	conserved Plasmodium protein, unknown function	399	0	0	0	0	7																	-4.04305
PFC10_API0028	elongation factor (tufA)	410	0	0	0	0	7																	-4.07025
PF3D7_1311400	clathrin-adaptor medium chain, putative	437	0	0	0	0	7																	-4.13402
PF3D7_0710100	conserved Plasmodium protein, unknown function	459	0	0	0	0	7																	-4.18314
PF3D7_1326400	translation initiation factor EIF-2B gamma subunit, putative	473	0	0	0	0	7																	-4.21319
PF3D7_1105700	conserved protein, unknown function	506	0	0	0	0	7																	-4.28063
PF3D7_0909600	conserved Plasmodium protein, unknown function	604	0	0	0	0	7																	-4.45766
PF3D7_1461600	splicing factor 3B subunit 2, putative (SF3B2)	677	0	0	0	0	7																	-4.57176
PF3D7_1140800	conserved Plasmodium protein, unknown function	803	0	0	0	0	7																	-4.74244
PF3D7_1226400	conserved Plasmodium protein, unknown function	856	0	0	0	0	7																	-4.80636
PF3D7_0730200	adapter-related protein, putative	858	0	0	0	0	7																	-4.80869
PF3D7_0909700	FHA domain protein, putative	1036	0	0	0	0	7																	-4.99721
PF3D7_1205900	conserved protein, unknown function	1082	0	0	0	0	7																	-5.04066
PF3D7_1227300	conserved Plasmodium protein, unknown function	1162	0	0	0	0	7																	-5.11199
PF3D7_0809800	conserved Plasmodium protein, unknown function	1297	0	0	0	0	7																	-5.2219
PF3D7_0415300	cdc2-related protein kinase 3 (CRK3)	1339	0	0	0	0	7																	-5.25377
PF3D7_1456000	transcription factor with AP2 domain(s) (ApiAP2)	1374	0	0	0	0	7																	-5.27957
PF3D7_0723400	conserved Plasmodium protein, unknown function	1422	0	0	0	0	7																	-5.31391
PF3D7_1359900	conserved Plasmodium membrane protein, unknown function	2126	0	0	0	0	7																	-5.71609
PF3D7_1302500	conserved Plasmodium protein, unknown function	2743	0	0	0	0	7																	-5.9709
PF3D7_0323000	translation machinery-associated protein 7, putative (TMA7)	54	0	0	0	0	6																	-2.19722
PF3D7_1458100	conserved Plasmodium protein, unknown function	58	0	0	0	0	6																	-2.26868
PF3D7_0822300	small nuclear ribonucleoprotein G, putative (SNRPG)	83	0	0	0	0	6																	-2.62708
PF3D7_1242900	mitochondrial import inner membrane translocase subunit TIM13, putative (TIM13)	95	0	0	0	0	6																	-2.76212
PF3D7_1433600	microsomal signal peptidase protein, putative (SPC1)	101	0	0	0	0	6																	-2.82336
PF3D7_1108300	pterin-4a-carbinolamine dehydratase (PCD)	107	0	0	0	0	6																	-2.88107
PF3D7_0627000	conserved Plasmodium protein, unknown function	110	0	0	0	0	6																	-2.90872
PF3D7_0414300	Rab5-interacting protein, putative	112	0	0	0	0	6																	-2.92674
PF3D7_0925500	thioredoxin-like protein 2 (TLP2)	128	0	0	0	0	6																	-3.06027
PF3D7_0723600	conserved Plasmodium protein, unknown function	149	0	0	0	0	6																	-3.21219
PF3D7_1108800	conserved Plasmodium protein, unknown function	155	0	0	0	0	6																	-3.25167
PF3D7_1249500	cutA, putative	159	0	0	0	0	6																	-3.27714
PF3D7_0921000.1,PF3D7_0921000.2	ubiquitin conjugating enzyme, putative;ubiquitin conjugating enzyme, putative	163	0	0	0	0	6																	-3.30199
PF3D7_1027400	DNA-directed RNA polymerase II, putative	177	0	0	0	0	6																	-3.38439
PF3D7_0916100	thioredoxin 3 (TRX3)	180	0	0	0	0	6																	-3.4012
PF3D7_0935000	small nuclear ribonucleoprotein (snRNP), putative	193	0	0	0	0	6																	-3.47093
PF3D7_0720000	35' exoribonuclease Csl4 homolog, putative	195	0	0	0	0	6																	-3.48124
PF3D7_0928900	guanylate kinase (GK)	199	0	0	0	0	6																	-3.50155
PF3D7_1469700	mediator of RNA polymerase II transcription subunit 6, putative	205	0	0	0	0	6																	-3.53125
PF3D7_0511600	conserved Plasmodium protein, unknown function	208	0	0	0	0	6																	-3.54578
PF3D7_0530100	SNARE protein, putative (SYN6)	225	0	0	0	0	6																	-3.62434
PF3D7_1441100	conserved Plasmodium protein, unknown function	227	0	0	0	0	6																	-3.63319
PF3D7_1316400	conserved Plasmodium protein, unknown function	228	0	0	0	0	6																	-3.63759
PF3D7_1135000.1,PF3D7_1135000.2,PF3D7_1135000.3	conserved Plasmodium protein, unknown function;conserved Plasmodium protein, unknown function;conserved Plasmodium protein, unknown function	233	0	0	0	0	6																	-3.65928
PF3D7_0721100	conserved Plasmodium protein, unknown function	244	0	0	0	0	6																	-3.70541
PF3D7_0524600	50S ribosomal protein L12, apicoplast, putative	257	0	0	0	0	6																	-3.75732
PF3D7_1141600	dolichol phosphate mannose synthase (DPM1)	259	0	0	0	0	6																	-3.76507
PF3D7_0509000	SNAP protein (soluble N-ethylmaleimide-sensitive factor Attachment Protein), putative	298	0	0	0	0	6																	-3.90533
PF3D7_1010800	50S ribosomal protein L22, mitochondrial, putative	299	0	0	0	0	6																	-3.90868
PF3D7_0314400	serine/threonine protein phosphatase, putative	308	0	0	0	0	6																	-3.93834
PF3D7_0323500	survival of motor neuron (SMN)-like protein	315	0	0	0	0	6																	-3.96081
PF3D7_0218000	replication factor C, subunit 2, putative	330	0	0	0	0	6																	-4.00733
PF3D7_1144500	ubiquitin activating enzyme (E1) subunit Aos1, putative (AOS1)	338	0	0	0	0	6																	-4.03129
PF3D7_0810900.1	conserved Plasmodium protein, unknown function	345	0	0	0	0	6																	-4.05178
PF3D7_1104100	syntaxin, Qa-SNARE family (SYN13)	347	0	0	0	0	6																	-4.05757
PF3D7_1011700	DNA repair protein RAD23, putative	389	0	0	0	0	6																	-4.17182
PF3D7_0418900	conserved Plasmodium protein, unknown function	396	0	0	0	0	6																	-4.18965
PF3D7_0607200	RING zinc finger protein, putative	429	0	0	0	0	6																	-4.2697
PF3D7_0320500	conserved Plasmodium protein, unknown function	429	0	0	0	0	6																	-4.2697
PF3D7_1237400	conserved Plasmodium protein, unknown function	438	0	0	0	0	6																	-4.29046
PF3D7_0728200	actin-like protein, putative (ALP3)	552	0	0	0	0	6																	-4.52179
PF3D7_0309000	dual specificity phosphatase (YVH1)	575	0	0	0	0	6																	-4.56261
PF3D7_1445600	RNA binding protein, putative	596	0	0	0	0	6																	-4.59848
PF3D7_0403100	regulator of chromosome condensation, putative	626	0	0	0	0	6																	-4.64759
PF3D7_0404300	conserved Plasmodium protein, unknown function	631	0	0	0	0	6																	-4.65555
PF3D7_1220800	conserved Plasmodium protein, unknown function	671	0	0	0	0	6																	-4.71701
PF3D7_0516300	tRNA pseudouridine synthase, putative	681	0	0	0	0	6																	-4.7318
PF3D7_1114700	serine/threonine protein kinase, putative (CLK3)	699	0	0	0	0	6																	-4.75789
PF3D7_1113800	conserved Plasmodium membrane protein, unknown function	702	0	0	0	0	6																	-4.76217
PF3D7_1309300	U4/U6 small nuclear ribonucleoprotein PRP3, putative (PRPF3)	728	0	0	0	0	6																	-4.79854
PF3D7_0522100	conserved Plasmodium protein, unknown function	763	0	0	0	0	6																	-4.8455
PF3D7_1410400	rhoptry-associated protein 1 (RAP1)	782	0	0	0	0	6																	-4.8701
PF3D7_1005600	DnaJ protein, putative	796	0	0	0	0	6																	-4.88784
PF3D7_0322400	regulator of initiation factor 2 (eIF2)	867	0	0	0	0	6																	-4.97328
PF3D7_0931000	elongation factor Tu, putative	911	0	0	0	0	6																	-5.02278
PF3D7_0811500	histone-arginine methyltransferase, putative (CARM1)	912	0	0	0	0	6																	-5.02388
PF3D7_1303400	conserved Plasmodium protein, unknown function	1022	0	0	0	0	6																	-5.13776
PF3D7_0716000	RNA binding protein, putative	1125	0	0	0	0	6																	-5.23378
PF3D7_1008500	conserved Plasmodium membrane protein, unknown function	1296	0	0	0	0	6																	-5.37528
PF3D7_0530300	conserved Plasmodium membrane protein, unknown function	1446	0	0	0	0	6																	-5.4848
PF3D7_0805700	serine/threonine protein kinase, FIKK family (FIKK8)	1457	0	0	0	0	6																	-5.49238
PF3D7_1103400	iron-sulfur assembly protein, sufD, putative	1462	0	0	0	0	6																	-5.4958
PF3D7_0615900	conserved Plasmodium protein, unknown function	1806	0	0	0	0	6																	-5.70711
PF3D7_1238500	conserved Plasmodium protein, unknown function	1812	0	0	0	0	6																	-5.71043
PF3D7_1010200	DNA2/NAM7 helicase, putative	1839	0	0	0	0	6																	-5.72522
PF3D7_1455600	ferlin, putative	1904	0	0	0	0	6																	-5.75995
PF3D7_0724000	Rab GTPase activator and protein kinase, putative	1936	0	0	0	0	6																	-5.77662
PF3D7_1205800	high mobility group protein B3, putative (HMGB3)	2284	0	0	0	0	6																	-5.94192
PF3D7_0409000	conserved Plasmodium protein, unknown function	2567	0	0	0	0	6																	-6.05873
PF3D7_0530900	formin 1	2675	0	0	0	0	6																	-6.09995
PF3D7_1136000	conserved Plasmodium protein, unknown function	3468	0	0	0	0	6																	-6.35957
PF3D7_0722700	conserved Plasmodium protein, unknown function	79	0	0	0	0	5																	-2.76001
PF3D7_0829300	U6 snRNA-associated Sm-like protein LSm8, putative (LSM8)	95	0	0	0	0	5																	-2.94444
PF3D7_1340800	mitochondrial pyruvate carrier protein 1, putative (MPC1)	106	0	0	0	0	5																	-3.054
PF3D7_0606300	conserved Plasmodium protein, unknown function	122	0	0	0	0	5																	-3.19458
PF3D7_0810700	conserved Plasmodium protein, unknown function	141	0	0	0	0	5																	-3.33932
PF3D7_0423100	clathrin assembly protein, putative	146	0	0	0	0	5																	-3.37417
PF3D7_1214700	conserved Plasmodium protein, unknown function	154	0	0	0	0	5																	-3.42751
PF3D7_1311700	cytochrome c2 precursor, putative	159	0	0	0	0	5																	-3.45947
PF3D7_0915100	ubiquitin conjugating enzyme, putative	159	0	0	0	0	5																	-3.45947
PF3D7_0829600	early transcribed membrane protein 8 (ETRAMP8)	170	0	0	0	0	5																	-3.52636
PF3D7_1315500	conserved Plasmodium protein, unknown function	183	0	0	0	0	5																	-3.60005
PF3D7_0816100	flavoprotein, putative	185	0	0	0	0	5																	-3.61092
PF3D7_0720800	Ham1-like protein, putative	198	0	0	0	0	5																	-3.67883
PF3D7_1147900	conserved Plasmodium protein, unknown function	217	0	0	0	0	5																	-3.77046
PF3D7_1307000	PNAS-3 related protein, putative	245	0	0	0	0	5																	-3.89182
PF3D7_1435500	conserved Plasmodium protein, unknown function	254	0	0	0	0	5																	-3.9279
PF3D7_1122700	conserved Plasmodium protein, unknown function	254	0	0	0	0	5																	-3.9279
PF3D7_0614400	conserved protein, unknown function	255	0	0	0	0	5																	-3.93183
PF3D7_0907300	conserved Plasmodium protein, unknown function	258	0	0	0	0	5																	-3.94352
PF3D7_0906910	tubulin-specific chaperone, putative	262	0	0	0	0	5																	-3.95891
PF3D7_0824600	anamorsin related protein, putative	266	0	0	0	0	5																	-3.97406
PF3D7_1213200	conserved Plasmodium protein, unknown function	278	0	0	0	0	5																	-4.01818
PF3D7_0202100	Plasmodium exported protein (PHISTc), unknown function,liver stage associated protein 2 (LSAP2)	302	0	0	0	0	5																	-4.10099
PF3D7_0604700	glyoxalase I (GILP)	307	0	0	0	0	5																	-4.11741
PF3D7_0915200	ribonuclease H2 subunit C, putative	322	0	0	0	0	5																	-4.16511
PF3D7_0213400	protein kinase 7 (PK7)	343	0	0	0	0	5																	-4.22829
PF3D7_1425700	conserved Plasmodium protein, unknown function	359	0	0	0	0	5																	-4.27388
PF3D7_1403700	translocation associated membrane protein, putative (TRAM)	359	0	0	0	0	5																	-4.27388
PF3D7_1367500	NADH-cytochrome b5 reductase, putative	362	0	0	0	0	5																	-4.28221
PF3D7_1026000	conserved Plasmodium protein, unknown function	363	0	0	0	0	5																	-4.28496
PF3D7_1031200	MORN repeat-containing protein 1 (MORN1)	364	0	0	0	0	5																	-4.28772
PF3D7_0211400	beta-ketoacyl-ACP synthase III (KASIII)	371	0	0	0	0	5																	-4.30676
PF3D7_1141800	phd finger protein, putative	394	0	0	0	0	5																	-4.36691
PF3D7_1328900	conserved Plasmodium protein, unknown function	397	0	0	0	0	5																	-4.3745
PF3D7_0403500	ubiquitin specific protease, putative	400	0	0	0	0	5																	-4.38203
PF3D7_0932400	peptide release factor, putative	404	0	0	0	0	5																	-4.39198
PF3D7_0603100	conserved Plasmodium protein, unknown function	452	0	0	0	0	5																	-4.50424
PF3D7_0525400	G-protein coupled receptor, putative	467	0	0	0	0	5																	-4.53689
PF3D7_1142400	coproporphyrinogen III oxidase (CPO)	470	0	0	0	0	5																	-4.54329
PF3D7_0914700	transporter, putative	516	0	0	0	0	5																	-4.63667
PF3D7_1032700	conserved Plasmodium protein, unknown function	553	0	0	0	0	5																	-4.70592
PF3D7_0624400	conserved Plasmodium protein, unknown function	607	0	0	0	0	5																	-4.79909
PF3D7_1434600	methionine aminopeptidase 2 (MetAP2)	628	0	0	0	0	5																	-4.8331
PF3D7_1409900	cytidine diphosphate-diacylglycerol synthase (CDS)	667	0	0	0	0	5																	-4.89335
PF3D7_0529000	conserved Plasmodium protein, unknown function	719	0	0	0	0	5																	-4.96842
PF3D7_0216400	vacuolar protein-sorting protein VPS45, putative	722	0	0	0	0	5																	-4.97259
PF3D7_0918700	conserved Plasmodium protein, unknown function	737	0	0	0	0	5																	-4.99315
PF3D7_0504400	ATP-dependent helicase, putative	755	0	0	0	0	5																	-5.01728
PF3D7_0218200	conserved Plasmodium protein, unknown function	807	0	0	0	0	5																	-5.08389
PF3D7_0708000	cytoskeleton associated protein, putative	868	0	0	0	0	5																	-5.15675
PF3D7_1316600	choline-phosphate cytidylyltransferase (CCT)	896	0	0	0	0	5																	-5.1885
PF3D7_1443900	heat shock protein 90, putative (HSP90)	927	0	0	0	0	5																	-5.22252
PF3D7_0602400	elongation factor G (EF-G)	937	0	0	0	0	5																	-5.23325
PF3D7_1332200	conserved Plasmodium protein, unknown function	1001	0	0	0	0	5																	-5.29932
PF3D7_0606000	conserved Plasmodium protein, unknown function	1063	0	0	0	0	5																	-5.35941
PF3D7_1439500	CCAAT-binding transcription factor, putative	1074	0	0	0	0	5																	-5.36971
PF3D7_0704200	tRNA m5C-methyltransferase, putative	1193	0	0	0	0	5																	-5.47479
PF3D7_1327000	conserved Plasmodium protein, unknown function	1214	0	0	0	0	5																	-5.49224
PF3D7_0819000	conserved Plasmodium protein, unknown function	1313	0	0	0	0	5																	-5.57063
PF3D7_1034500	conserved Plasmodium protein, unknown function	1511	0	0	0	0	5																	-5.71109
PF3D7_0509800	phosphatidylinositol 4-kinase	1559	0	0	0	0	5																	-5.74236
PF3D7_1131800	oxysterol-binding protein-related protein 2	1576	0	0	0	0	5																	-5.75321
PF3D7_1432200	conserved Plasmodium protein, unknown function	1670	0	0	0	0	5																	-5.81114
PF3D7_0727900	conserved Plasmodium protein, unknown function	1923	0	0	0	0	5																	-5.9522
PF3D7_1419400	conserved Plasmodium membrane protein, unknown function	2201	0	0	0	0	5																	-6.08723
PF3D7_1008000	inositol polyphosphate kinase, putative (IPK1)	2379	0	0	0	0	5																	-6.165
PF3D7_0628200	protein kinase PK4 (PK4)	3072	0	0	0	0	5																	-6.42065
PF3D7_1228800	conserved Plasmodium protein, unknown function	3209	0	0	0	0	5																	-6.46428
PF3D7_1234100	conserved Plasmodium protein, unknown function	3896	0	0	0	0	5																	-6.65827
PF3D7_0930800	conserved Plasmodium membrane protein, unknown function	4568	0	0	0	0	5																	-6.81739
PF3D7_1308400	conserved Plasmodium protein, unknown function	6147	0	0	0	0	5																	-7.11428
PF3D7_0708100	DNA-directed RNA polymerase 2 8.2 kDa polypeptide, putative	69	0	0	0	0	4																	-2.84781
PF3D7_1448900	conserved Plasmodium protein, unknown function	75	0	0	0	0	4																	-2.93119
PF3D7_0913800	conserved Plasmodium protein, unknown function	86	0	0	0	0	4																	-3.06805
PF3D7_0304400	60S ribosomal protein L44, putative	104	0	0	0	0	4																	-3.2581
PF3D7_1224900	splicing factor 3b subunit, putative (SF3B14)	106	0	0	0	0	4																	-3.27714
PF3D7_1011200.1,PF3D7_1011200.2	conserved Plasmodium protein, unknown function;conserved Plasmodium protein, unknown function	114	0	0	0	0	4																	-3.3499
PF3D7_0306000	conserved Plasmodium protein, unknown function	137	0	0	0	0	4																	-3.53369
PF3D7_1347400	conserved Plasmodium protein, unknown function	139	0	0	0	0	4																	-3.54818
PF3D7_1250500	adaptor-related protein complex 3, sigma 2 subunit, putative	157	0	0	0	0	4																	-3.66995
PF3D7_1437100	conserved Plasmodium protein, unknown function	158	0	0	0	0	4																	-3.6763
PF3D7_0408000	conserved Plasmodium protein, unknown function	171	0	0	0	0	4																	-3.75537
PF3D7_1118000	conserved Plasmodium protein, unknown function	200	0	0	0	0	4																	-3.91202
PF3D7_1209700	conserved Plasmodium protein, unknown function	214	0	0	0	0	4																	-3.97968
PF3D7_1469800	conserved Plasmodium protein, unknown function	215	0	0	0	0	4																	-3.98434
PF3D7_0829100	conserved protein, unknown function	216	0	0	0	0	4																	-3.98898
PF3D7_1363600	conserved Plasmodium protein, unknown function	227	0	0	0	0	4																	-4.03866
PF3D7_0919700	pyridoxal 5phosphate dependent enzyme class III, putative	242	0	0	0	0	4																	-4.10264
PF3D7_0707600	conserved Plasmodium protein, unknown function	244	0	0	0	0	4																	-4.11087
PF3D7_0921400	Fe-S-cluster redox enzyme, putative (NifU)	247	0	0	0	0	4																	-4.12309
PF3D7_0110400	DNA-directed RNA polymerase 2, putative	249	0	0	0	0	4																	-4.13116
PF3D7_0933900	conserved Plasmodium protein, unknown function	250	0	0	0	0	4																	-4.13517
PF3D7_1329600	conserved Plasmodium protein, unknown function	301	0	0	0	0	4																	-4.32082
PF3D7_1327400	conserved Plasmodium protein, unknown function	302	0	0	0	0	4																	-4.32413
PF3D7_1475800	conserved Plasmodium protein, unknown function	309	0	0	0	0	4																	-4.34705
PF3D7_1226100	hydrolase/phosphatase, putative	316	0	0	0	0	4																	-4.36945
PF3D7_1326100	conserved Plasmodium protein, unknown function	336	0	0	0	0	4																	-4.43082
PF3D7_0917300	conserved Plasmodium membrane protein, unknown function	339	0	0	0	0	4																	-4.43971
PF3D7_1323900	conserved Plasmodium protein, unknown function	376	0	0	0	0	4																	-4.54329
PF3D7_0404900	6-cysteine protein (P41)	378	0	0	0	0	4																	-4.5486
PF3D7_0501600	rhoptry-associated protein 2 (RAP2)	398	0	0	0	0	4																	-4.60016
PF3D7_1450900	acetyl-CoA acetyltransferase, putative	398	0	0	0	0	4																	-4.60016
PF3D7_0722100	PelOta protein homologue, putative	403	0	0	0	0	4																	-4.61264
PF3D7_0302800	conserved Plasmodium protein, unknown function	419	0	0	0	0	4																	-4.65158
PF3D7_1103600	actin-like protein, putative (ALP2a)	499	0	0	0	0	4																	-4.82631
PF3D7_1327800	ribose-phosphate pyrophosphokinase, putative	560	0	0	0	0	4																	-4.94164
PF3D7_1233700	homocysteine S-methyltransferase, putative	581	0	0	0	0	4																	-4.97846
PF3D7_0502400	ring-stage membrane protein 1,merozoite surface protein 8 (MSP8)	597	0	0	0	0	4																	-5.00562
PF3D7_1305400	AAR2 protein, putative	609	0	0	0	0	4																	-5.02552
PF3D7_1317600	conserved Plasmodium protein, unknown function	620	0	0	0	0	4																	-5.04343
PF3D7_0510500	topoisomerase I	839	0	0	0	0	4																	-5.34592
PF3D7_0515000	RNA binding protein, putative	848	0	0	0	0	4																	-5.35659
PF3D7_1246300	conserved Plasmodium protein, unknown function	888	0	0	0	0	4																	-5.40268
PF3D7_1316500	conserved Plasmodium protein, unknown function	906	0	0	0	0	4																	-5.42274
PF3D7_0511200	stearoyl-CoA desaturase (SCD)	949	0	0	0	0	4																	-5.46911
PF3D7_1038100	GDP dissociation inhibitor domain containing protein	980	0	0	0	0	4																	-5.50126
PF3D7_0934100	DNA excision-repair helicase, putative	1056	0	0	0	0	4																	-5.57595
PF3D7_0603400	trophozoite exported protein 1 (TEX1)	1103	0	0	0	0	4																	-5.61949
PF3D7_0615800	conserved Plasmodium protein, unknown function	1185	0	0	0	0	4																	-5.6912
PF3D7_0811600	conserved Plasmodium protein, unknown function	1210	0	0	0	0	4																	-5.71208
PF3D7_1412700	AAA family ATPase, putative	1219	0	0	0	0	4																	-5.71949
PF3D7_1203400	transporter, putative	1250	0	0	0	0	4																	-5.7446
PF3D7_1440400	conserved Plasmodium protein, unknown function	1280	0	0	0	0	4																	-5.76832
PF3D7_1126100	autophagy-related protein 7, putative (ATG7)	1316	0	0	0	0	4																	-5.79606
PF3D7_1136900	subtilisin-like protease 2 (SUB2)	1341	0	0	0	0	4																	-5.81488
PF3D7_1423800	conserved Plasmodium protein, unknown function	1468	0	0	0	0	4																	-5.90536
PF3D7_1117900	conserved Plasmodium protein, unknown function	1471	0	0	0	0	4																	-5.9074
PF3D7_0921600	tetratricopeptide repeat family protein, putative	1650	0	0	0	0	4																	-6.02224
PF3D7_1351000	phosphatidylinositol transfer protein, putative	1860	0	0	0	0	4																	-6.14204
PF3D7_0418600	regulator of chromosome condensation, putative	2011	0	0	0	0	4																	-6.22009
PF3D7_1411400	plastid replication-repair enzyme (PREX)	2016	0	0	0	0	4																	-6.22258
PF3D7_0519500	carbon catabolite repressor protein 4, putative (CCR4)	2488	0	0	0	0	4																	-6.43294
PF3D7_0926200	conserved Plasmodium protein, unknown function	51	0	0	0	0	3																	-2.83321
PF3D7_1025800	unspecified product	67	0	0	0	0	3																	-3.10608
PF3D7_1460300	unspecified product	67	0	0	0	0	3																	-3.10608
PF3D7_1112000	conserved Plasmodium protein, unknown function	72	0	0	0	0	3																	-3.17805
PF3D7_1311000	conserved Plasmodium protein, unknown function	87	0	0	0	0	3																	-3.3673
PF3D7_0721800	conserved Plasmodium protein, unknown function	106	0	0	0	0	3																	-3.56483
PF3D7_1320900	RNA-binding protein, putative	125	0	0	0	0	3																	-3.7297
PF3D7_1248300	conserved Plasmodium membrane protein, unknown function	137	0	0	0	0	3																	-3.82137
PF3D7_1231500	DIM1 protein homolog, putative	139	0	0	0	0	3																	-3.83586
PF3D7_0816700	conserved Plasmodium protein, unknown function	143	0	0	0	0	3																	-3.86423
PF3D7_0626600	conserved Plasmodium protein, unknown function	145	0	0	0	0	3																	-3.87812
PF3D7_1124400	U6 snRNA-associated Sm-like protein LSm1, putative (LSM1)	147	0	0	0	0	3																	-3.89182
PF3D7_1434700	mitochondrial import inner membrane translocase subunit TIM17, putative (TIM17)	162	0	0	0	0	3																	-3.98898
PF3D7_1131000	RNA-binding protein s1, putative	170	0	0	0	0	3																	-4.03719
PF3D7_1247200	conserved Plasmodium protein, unknown function	174	0	0	0	0	3																	-4.06044
PF3D7_1224100	conserved Plasmodium protein, unknown function	192	0	0	0	0	3																	-4.15888
PF3D7_1405200	sybindin-like protein, putative	192	0	0	0	0	3																	-4.15888
PF3D7_1116200.1,PF3D7_1116200.2	pyridoxine biosynthesis protein PDX2 (PDX2);pyridoxine biosynthesis protein PDX2 (PDX2)	219	0	0	0	0	3																	-4.29046
PF3D7_1244700	conserved Plasmodium protein, unknown function	222	0	0	0	0	3																	-4.30407
PF3D7_1432700	protein-L-isoaspartate O-methyltransferase beta-aspartate methyltransferase, putative	224	0	0	0	0	3																	-4.31303
PF3D7_0532200	Plasmodium exported protein (PHISTc), unknown function	226	0	0	0	0	3																	-4.32192
PF3D7_0619900	splicing factor 3A subunit 2, putative (SF3A2)	233	0	0	0	0	3																	-4.35243
PF3D7_0907900	peptide deformylase (PDF)	241	0	0	0	0	3																	-4.38618
PF3D7_1436800	ATP-dependent Clp protease proteolytic subunit (ClpR)	244	0	0	0	0	3																	-4.39856
PF3D7_1214900	conserved Plasmodium membrane protein, unknown function	245	0	0	0	0	3																	-4.40265
PF3D7_1016100	conserved Plasmodium protein, unknown function	257	0	0	0	0	3																	-4.45046
PF3D7_1112500	conserved Plasmodium protein, unknown function	278	0	0	0	0	3																	-4.52901
PF3D7_0618700	transport protein particle (TRAPP) component, putative	284	0	0	0	0	3																	-4.55036
PF3D7_1356900	protein kinase 5 (PK5)	288	0	0	0	0	3																	-4.56435
PF3D7_1316800	sec20 homolog, putative	290	0	0	0	0	3																	-4.57127
PF3D7_1317300	conserved Plasmodium protein, unknown function	296	0	0	0	0	3																	-4.59175
PF3D7_1337100	protein kinase 6 (PK6)	305	0	0	0	0	3																	-4.6217
PF3D7_1368400	conserved Plasmodium protein, unknown function	320	0	0	0	0	3																	-4.66971
PF3D7_1303300	conserved Plasmodium protein, unknown function	320	0	0	0	0	3																	-4.66971
PF3D7_1364900	ferrochelatase (FC)	350	0	0	0	0	3																	-4.75932
PF3D7_1445700	conserved Plasmodium protein, unknown function	351	0	0	0	0	3																	-4.76217
PF3D7_1323300	acetyltransferase, GNAT family, putative	352	0	0	0	0	3																	-4.76502
PF3D7_1435100	ribonuclease H2 subunit B, putative	359	0	0	0	0	3																	-4.78471
PF3D7_1009400	zinc finger protein, putative	362	0	0	0	0	3																	-4.79303
PF3D7_0815700	ubiquitin (Ub)	373	0	0	0	0	3																	-4.82297
mal_mito_3	apocytochrome b (cyb)	376	0	0	0	0	3																	-4.83098
PF3D7_0717300	transcription initiation factor IIE, alpha subunit, putative	392	0	0	0	0	3																	-4.87265
PF3D7_1442800	conserved Plasmodium protein, unknown function	402	0	0	0	0	3																	-4.89784
PF3D7_0626200	conserved Plasmodium protein, unknown function	418	0	0	0	0	3																	-4.93687
PF3D7_1413200	conserved Plasmodium protein, unknown function	418	0	0	0	0	3																	-4.93687
PF3D7_0103200	nucleoside transporter 4 (NT4)	434	0	0	0	0	3																	-4.97443
PF3D7_0301300	alpha/beta hydrolase, putative	437	0	0	0	0	3																	-4.98132
PF3D7_0210600	conserved Plasmodium protein, unknown function	446	0	0	0	0	3																	-5.00171
PF3D7_0112000	TatD-like deoxyribonuclease, putative	447	0	0	0	0	3																	-5.00395
PF3D7_1116500	folate transporter 2 (FT2)	455	0	0	0	0	3																	-5.02169
PF3D7_0527600	conserved Plasmodium protein, unknown function	455	0	0	0	0	3																	-5.02169
PF3D7_0213500	conserved Plasmodium protein, unknown function	460	0	0	0	0	3																	-5.03261
PF3D7_1364500	exosome complex exonuclease, putative	477	0	0	0	0	3																	-5.0689
PF3D7_1427600	CorA-like Mg2 transporter protein, putative	478	0	0	0	0	3																	-5.071
PF3D7_1142900	conserved Plasmodium protein, unknown function	507	0	0	0	0	3																	-5.1299
PF3D7_0919400	protein disulfide isomerase (PDI9)	515	0	0	0	0	3																	-5.14555
PF3D7_1015300	methionine aminopeptidase 1b, putative (MetAP1b)	517	0	0	0	0	3																	-5.14943
PF3D7_0519900	conserved Plasmodium protein, unknown function	525	0	0	0	0	3																	-5.16479
PF3D7_1311200	alternative splicing regulator, putative	527	0	0	0	0	3																	-5.16859
PF3D7_0623000	chorismate synthase (CS)	527	0	0	0	0	3																	-5.16859
PF3D7_1326700	conserved Plasmodium protein, unknown function	542	0	0	0	0	3																	-5.19665
PF3D7_1411300	conserved Plasmodium protein, unknown function	568	0	0	0	0	3																	-5.24351
PF3D7_1405500	COBW domain-containing protein 1, putative (CBWD1)	575	0	0	0	0	3																	-5.25576
PF3D7_1121400	WD domain, G-beta repeat-containing protein	582	0	0	0	0	3																	-5.26786
PF3D7_1215400	conserved Plasmodium protein, unknown function	616	0	0	0	0	3																	-5.32463
PF3D7_0510200	peptidyl-prolyl cis-trans isomerase (CYP87)	747	0	0	0	0	3																	-5.51745
PF3D7_1344100	krox-like protein. putative	805	0	0	0	0	3																	-5.59223
PF3D7_1452400	conserved Plasmodium protein, unknown function	900	0	0	0	0	3																	-5.70378
PF3D7_1435700.1,PF3D7_1435700.2	ataxin-2 like protein, putative;ataxin-2 like protein, putative	908	0	0	0	0	3																	-5.71263
PF3D7_1304100	DNA ligase I (LigI)	912	0	0	0	0	3																	-5.71703
PF3D7_0914000	pseudouridylate synthase, putative	955	0	0	0	0	3																	-5.7631
PF3D7_1239500	DNA gyrase subunit B (GyrB)	1006	0	0	0	0	3																	-5.81513
PF3D7_1235900	pre-mRNA-splicing factor SYF1, putative (XAB2)	1031	0	0	0	0	3																	-5.83967
PF3D7_1017000	DNA polymerase delta catalytic subunit	1094	0	0	0	0	3																	-5.89898
PF3D7_0408100	conserved Plasmodium protein, unknown function	1121	0	0	0	0	3																	-5.92336
PF3D7_0935200	sec-1 family protein	1147	0	0	0	0	3																	-5.94629
PF3D7_1223300	DNA gyrase subunit A (GyrA)	1222	0	0	0	0	3																	-6.00963
PF3D7_1344700	conserved Plasmodium protein, unknown function	1244	0	0	0	0	3																	-6.02747
PF3D7_0502000	conserved Plasmodium protein, unknown function	1272	0	0	0	0	3																	-6.04973
PF3D7_0602600	conserved Plasmodium protein, unknown function	1297	0	0	0	0	3																	-6.0692
PF3D7_0302100	serine/threonine protein kinase (SRPK1)	1338	0	0	0	0	3																	-6.10032
PF3D7_0302200	cytoadherence linked asexual protein 3.2 (CLAG3.2)	1416	0	0	0	0	3																	-6.15698
PF3D7_0511300	MORN repeat protein, putative	1417	0	0	0	0	3																	-6.15768
PF3D7_1127800	conserved Plasmodium protein, unknown function	1420	0	0	0	0	3																	-6.1598
PF3D7_0514100	ATP-dependent DNA helicase UvrD (UvrD)	1441	0	0	0	0	3																	-6.17448
PF3D7_1344900	conserved Plasmodium protein, unknown function	1488	0	0	0	0	3																	-6.20658
PF3D7_0706100	conserved Plasmodium protein, unknown function	1529	0	0	0	0	3																	-6.23376
PF3D7_0407700	conserved Plasmodium protein, unknown function	1629	0	0	0	0	3																	-6.29711
PF3D7_1124100	neutral-sphingomyelinase activation factor protein, putative	1653	0	0	0	0	3																	-6.31173
PF3D7_0719400	conserved Plasmodium protein, unknown function	1731	0	0	0	0	3																	-6.35784
PF3D7_1439300	conserved Plasmodium protein, unknown function	1803	0	0	0	0	3																	-6.39859
PF3D7_0319000	P-type ATPase, putative (ATPase7)	1864	0	0	0	0	3																	-6.43187
PF3D7_0504000	cation transporting P-ATPase (ATPase3)	2393	0	0	0	0	3																	-6.68169
PF3D7_1131600	conserved Plasmodium protein, unknown function	2763	0	0	0	0	3																	-6.82546
PF3D7_0730500	conserved Plasmodium protein, unknown function	2773	0	0	0	0	3																	-6.82907
PF3D7_0104300	ubiquitin carboxyl-terminal hydrolase 1, putative (UBP1)	3499	0	0	0	0	3																	-7.06162
PF3D7_1417400	cyclic nucleotide-binding protein, putative, pseudogene (cNBP)	3567	0	0	0	0	3																	-7.08087
PF3D7_0506500	conserved Plasmodium protein, unknown function	3980	0	0	0	0	3																	-7.19042
PF3D7_1110000	conserved Plasmodium protein, unknown function	82	0	0	0	0	2																	-3.71357
PF3D7_1307500	conserved Plasmodium protein, unknown function	88	0	0	0	0	2																	-3.78419
PF3D7_1403600	selenoprotein (Sel1)	116	0	0	0	0	2																	-4.06044
PF3D7_1028800	conserved Plasmodium protein, unknown function	117	0	0	0	0	2																	-4.06903
PF3D7_1304900	DNA-directed RNA polymerase 2, putative	126	0	0	0	0	2																	-4.14313
PF3D7_0208500	acyl carrier protein (ACP)	137	0	0	0	0	2																	-4.22683
PF3D7_1361600	conserved Plasmodium protein, unknown function	137	0	0	0	0	2																	-4.22683
PF3D7_0406200	sexual stage-specific protein precursor (Pfs16)	157	0	0	0	0	2																	-4.3631
PF3D7_1146200	conserved Plasmodium protein, unknown function	165	0	0	0	0	2																	-4.4128
PF3D7_1353700	conserved Plasmodium protein, unknown function	168	0	0	0	0	2																	-4.43082
PF3D7_0303600	plasmoredoxin (Plrx)	179	0	0	0	0	2																	-4.49424
PF3D7_1013700	conserved Plasmodium protein, unknown function	191	0	0	0	0	2																	-4.55913
PF3D7_0523900	conserved Plasmodium membrane protein, unknown function	203	0	0	0	0	2																	-4.62006
PF3D7_1452500	SNARE protein, putative (BET1)	211	0	0	0	0	2																	-4.65871
PF3D7_0212200	mitochondrial ribosomal protein L12 precursor, putative	255	0	0	0	0	2																	-4.84812
PF3D7_0512900	conserved Plasmodium protein, unknown function	265	0	0	0	0	2																	-4.88658
PF3D7_0420400	ribosome recycling factor, putative	266	0	0	0	0	2																	-4.89035
PF3D7_1448800	Appr-1-p processing domain protein	272	0	0	0	0	2																	-4.91265
PF3D7_1028200	zinc finger, C3HC4 type, putative	274	0	0	0	0	2																	-4.91998
PF3D7_0315900	conserved Plasmodium protein, unknown function	277	0	0	0	0	2																	-4.93087
PF3D7_0529300	apicoplast TIC22 protein (TIC22)	279	0	0	0	0	2																	-4.93806
PF3D7_1119300	U2 snRNP auxiliary factor, small subunit, putative	294	0	0	0	0	2																	-4.99043
PF3D7_0106600	conserved Plasmodium protein, unknown function	299	0	0	0	0	2																	-5.0073
PF3D7_0908300.1,PF3D7_0908300.2	conserved Plasmodium membrane protein, unknown function;conserved Plasmodium membrane protein, unknown function	305	0	0	0	0	2																	-5.02716
PF3D7_1205700	targeted glyoxalase II (tGloII)	322	0	0	0	0	2																	-5.0814
PF3D7_0516400	phosducin-like protein, putative (PhLP3)	335	0	0	0	0	2																	-5.12098
PF3D7_1015800	ribonucleotide reductase small subunit, putative	335	0	0	0	0	2																	-5.12098
PF3D7_1449900	conserved Plasmodium protein, unknown function	340	0	0	0	0	2																	-5.1358
PF3D7_0510700	conserved Plasmodium protein, unknown function	347	0	0	0	0	2																	-5.15618
PF3D7_1111100	replication factor C subunit 5, putative (RFC5)	349	0	0	0	0	2																	-5.16192
PF3D7_1472900	dihydroorotase, putative	358	0	0	0	0	2																	-5.18739
PF3D7_0315800	zinc finger protein, putative	365	0	0	0	0	2																	-5.20675
PF3D7_1425900	conserved Plasmodium protein, unknown function	368	0	0	0	0	2																	-5.21494
PF3D7_0622700	conserved Plasmodium membrane protein, unknown function	381	0	0	0	0	2																	-5.24965
PF3D7_0322500	iron-sulfur cluster assembly accessory protein, putative	404	0	0	0	0	2																	-5.30827
PF3D7_0528400	cell cycle regulator with zn-finger domain, putative	406	0	0	0	0	2																	-5.31321
PF3D7_1136700.1,PF3D7_1136700.2	conserved Plasmodium protein, unknown function;conserved Plasmodium protein, unknown function	421	0	0	0	0	2																	-5.34949
PF3D7_1031800	conserved Plasmodium protein, unknown function	425	0	0	0	0	2																	-5.35894
PF3D7_1433300	chromatin assembly factor 1 P55 subunit, putative	428	0	0	0	0	2																	-5.36598
PF3D7_0829400	prolyl 4-hydroxylase alpha subunit 1, putative	441	0	0	0	0	2																	-5.3959
PF3D7_1438700	small subunit DNA primase	452	0	0	0	0	2																	-5.42053
PF3D7_0415700	conserved Plasmodium protein, unknown function	461	0	0	0	0	2																	-5.44025
PF3D7_1128700	GPI8p transamidase	493	0	0	0	0	2																	-5.50736
PF3D7_1201500	XPA binding protein 1, putative	497	0	0	0	0	2																	-5.51544
PF3D7_0308000	DNA polymerase epsilon subunit b, putative	498	0	0	0	0	2																	-5.51745
PF3D7_0715300	calcium/calmodulin-dependent protein kinase, putative	517	0	0	0	0	2																	-5.5549
PF3D7_1220400	debranching enzyme-associated ribonuclease, putative (DRN1)	519	0	0	0	0	2																	-5.55876
PF3D7_1420600	pantothenate kinase, putative (PANK)	519	0	0	0	0	2																	-5.55876
PF3D7_0412300	phosphopantothenoylcysteine synthetase, putative	540	0	0	0	0	2																	-5.59842
PF3D7_1128600	CCR4-NOT transcription complex subunit 2, putative (NOT2)	559	0	0	0	0	2																	-5.633
PF3D7_1024000	conserved Plasmodium protein, unknown function	566	0	0	0	0	2																	-5.64545
PF3D7_1108000	IWS1-like protein, putative	568	0	0	0	0	2																	-5.64897
PF3D7_1415700	serine C-palmitoyltransferase, putative	572	0	0	0	0	2																	-5.65599
[truncated: 143 more rows]
